# Supplementary material for: Pleural mesothelioma risk in the construction industry: a case–control study in Italy, 2000–2018
Source: PubMed Central journal article supplement — BMJ Open. 2023 Aug 11;13(8):e073480. doi: 10.1136/bmjopen-2023-073480 (PMC10423786; doi:10.1136/bmjopen-2023-073480), 2023-08-11

**Supplementary Figure 1** Diagram showing numbers of male pleural mesothelioma cases and controls across the years and their main characteristics, Italy, 2002-2004 and 2012-2016. Cases selected from the **same periods** of controls (**analysis A2**). In the primary approach subjects ever employed in non-construction blue collar occupations for >5 years were excluded; in the secondary approach all subjects (also those ever employed in non-construction blue collar occupations for >5 years) were included.

| Period                        | Year | N. cases<br>Primary/<br>secondary<br>approach | Case source                                                                                                                                             | Control source                                                                                                                                                                           |
|-------------------------------|------|-----------------------------------------------|---------------------------------------------------------------------------------------------------------------------------------------------------------|------------------------------------------------------------------------------------------------------------------------------------------------------------------------------------------|
| 2002-2004<br>and<br>2012-2016 | 2002 | 214/760                                       | <b>NATIONAL<br/>MESOTHELIOMA<br/>REGISTRY</b><br>Living in any Region<br>ReNaM questionnaire<br><b>Primary/secondary<br/>approach:<br/>N. 2156/6910</b> | <b>EAGLE</b> Living in 216 municipalities in five Lombardy Provinces (Milan, Monza, Brescia, Pavia, Varese)<br>EAGLE questionnaire<br><b>Primary/secondary approach:<br/>N. 778/1617</b> |
|                               | 2003 | 238/758                                       |                                                                                                                                                         |                                                                                                                                                                                          |
|                               | 2004 | 246/768                                       |                                                                                                                                                         |                                                                                                                                                                                          |
|                               | 2012 | 288/886                                       |                                                                                                                                                         | <b>MISEM</b> Living in five Regions (Apulia, Lombardy, Piedmont, Tuscany, Veneto)<br>ReNaM questionnaire<br><b>Primary/secondary approach: N. 250/490</b>                                |
|                               | 2013 | 304/979                                       |                                                                                                                                                         |                                                                                                                                                                                          |
|                               | 2014 | 289/928                                       |                                                                                                                                                         |                                                                                                                                                                                          |
|                               | 2015 | 283/921                                       |                                                                                                                                                         |                                                                                                                                                                                          |
|                               | 2016 | 294/910                                       |                                                                                                                                                         |                                                                                                                                                                                          |

CARA, Cholangiocarcinoma Aetiology: Role of Asbestos; EAGLE, Environment And Genetics in Lung cancer Etiology; MISEM, Multicentre Italian Study on the Etiology of Mesothelioma; ReNaM, Registro Nazionale Mesoteliomi

**Supplementary Figure 2** Diagram showing numbers of male pleural mesothelioma cases and controls across the years and their main characteristics, Italy, 2000–2018. Cases selected from the **same areas** of controls (**analysis A3**). In the primary approach subjects ever employed in non-construction blue collar occupations for >5 years were excluded; in the secondary approach all subjects (also those ever employed in non-construction blue collar occupations for >5 years) were included.

| Period    | Year   | N. cases<br>Primary/<br>secondary<br>approach | Case source                                                                                                                                                                                                                                           | Control source                                                                                                                                                                                                                                                                                     |
|-----------|--------|-----------------------------------------------|-------------------------------------------------------------------------------------------------------------------------------------------------------------------------------------------------------------------------------------------------------|----------------------------------------------------------------------------------------------------------------------------------------------------------------------------------------------------------------------------------------------------------------------------------------------------|
| 2000-2018 | 2000   | 134/389                                       | <b>LOMBARDY<br/>MESOTHELIOMA<br/>REGISTRY</b><br>Living in six Regions<br>(Lombardy, Piedmont,<br>Veneto, Tuscany, Apulia,<br>Emilia-Romagna)<br>ReNaM questionnaire<br><b>Primary/secondary<br/>           approach:<br/>           N. 2690/8933</b> | <b>EAGLE</b> Living in 216 municipalities in five<br>Lombardy Provinces<br>(Milan, Monza, Brescia, Pavia, Varese)<br>EAGLE questionnaire<br><b>Primary/secondary approach:<br/>           N. 778/1617</b>                                                                                          |
|           | 2001   | 117/399                                       |                                                                                                                                                                                                                                                       |                                                                                                                                                                                                                                                                                                    |
|           | 2002   | 114/405                                       |                                                                                                                                                                                                                                                       |                                                                                                                                                                                                                                                                                                    |
|           | 2003   | 142/444                                       |                                                                                                                                                                                                                                                       |                                                                                                                                                                                                                                                                                                    |
|           | 2004   | 134/443                                       |                                                                                                                                                                                                                                                       |                                                                                                                                                                                                                                                                                                    |
|           | 2005   | 135/481                                       |                                                                                                                                                                                                                                                       |                                                                                                                                                                                                                                                                                                    |
|           | 2006   | 125/419                                       |                                                                                                                                                                                                                                                       |                                                                                                                                                                                                                                                                                                    |
|           | 2007   | 121/471                                       |                                                                                                                                                                                                                                                       |                                                                                                                                                                                                                                                                                                    |
|           | 2008   | 129/469                                       |                                                                                                                                                                                                                                                       |                                                                                                                                                                                                                                                                                                    |
|           | 2009   | 156/507                                       |                                                                                                                                                                                                                                                       | <b>MISEM</b> Living in five Regions<br>(Apulia, Lombardy, Piedmont,<br>Tuscany, Veneto)<br>ReNaM questionnaire<br><b>Primary/secondary approach: N. 250/490</b><br><br><b>CARA</b> Living in one Region<br>(Emilia-Romagna)<br>ReNaM questionnaire<br><b>Primary/secondary approach: N. 57/103</b> |
|           | 2010   | 142/482                                       |                                                                                                                                                                                                                                                       |                                                                                                                                                                                                                                                                                                    |
|           | 2011   | 156/540                                       |                                                                                                                                                                                                                                                       |                                                                                                                                                                                                                                                                                                    |
|           | 2012   | 176/532                                       |                                                                                                                                                                                                                                                       |                                                                                                                                                                                                                                                                                                    |
|           | 2013   | 176/604                                       |                                                                                                                                                                                                                                                       |                                                                                                                                                                                                                                                                                                    |
|           | 2014   | 146/505                                       |                                                                                                                                                                                                                                                       |                                                                                                                                                                                                                                                                                                    |
|           | 2015   | 161/526                                       |                                                                                                                                                                                                                                                       |                                                                                                                                                                                                                                                                                                    |
|           | 2016   | 188/592                                       |                                                                                                                                                                                                                                                       |                                                                                                                                                                                                                                                                                                    |
|           | 2017   | 179/536                                       |                                                                                                                                                                                                                                                       |                                                                                                                                                                                                                                                                                                    |
| 2018      | 59/189 |                                               |                                                                                                                                                                                                                                                       |                                                                                                                                                                                                                                                                                                    |

CARA, Cholangiocarcinoma Aetiology: Role of Asbestos; EAGLE, Environment And Genetics in Lung cancer Etiology; MISEM, Multicentre Italian Study on the Etiology of Mesothelioma; ReNaM, Registro Nazionale Mesoteliomi

**Supplementary Figure 3** Diagram showing numbers of male pleural mesothelioma cases and controls across the years and their main characteristics, Italy, 2002-2004 and 2012-2016. Cases selected from the **same periods and areas** of controls (**analysis A4**). In the primary approach subjects ever employed in non-construction blue collar occupations for >5 years were excluded; in the secondary approach all subjects (also those ever employed in non-construction blue collar occupations for >5 years) were included.

| Period                        | Year | N. cases<br>Primary/<br>secondary<br>approach | Case source                                                                                                                                                                                                                                           | Control source                                                                                                                                                                                            |
|-------------------------------|------|-----------------------------------------------|-------------------------------------------------------------------------------------------------------------------------------------------------------------------------------------------------------------------------------------------------------|-----------------------------------------------------------------------------------------------------------------------------------------------------------------------------------------------------------|
| 2002-2004<br>and<br>2012-2016 | 2002 | 114/405                                       | <b>NATIONAL<br/>MESOTHELIOMA<br/>REGISTRY</b><br>Living in six Regions<br>(Lombardy, Piedmont,<br>Veneto, Tuscany, Apulia,<br>Emilia-Romagna)<br>ReNaM questionnaire<br><b>Primary/secondary<br/>           approach:<br/>           N. 1237/4051</b> | <b>EAGLE</b> Living in 216 municipalities in five<br>Lombardy Provinces<br>(Milan, Monza, Brescia, Pavia, Varese)<br>EAGLE questionnaire<br><b>Primary/secondary approach:<br/>           N. 778/1617</b> |
|                               | 2003 | 142/444                                       |                                                                                                                                                                                                                                                       |                                                                                                                                                                                                           |
|                               | 2004 | 134/443                                       |                                                                                                                                                                                                                                                       |                                                                                                                                                                                                           |
|                               | 2012 | 176/532                                       |                                                                                                                                                                                                                                                       | <b>MISEM</b> Living in five Regions<br>(Apulia, Lombardy, Piedmont,<br>Tuscany, Veneto)<br>ReNaM questionnaire<br><b>Primary/secondary approach: N. 250/490</b>                                           |
|                               | 2013 | 176/605                                       |                                                                                                                                                                                                                                                       |                                                                                                                                                                                                           |
|                               | 2014 | 146/504                                       |                                                                                                                                                                                                                                                       |                                                                                                                                                                                                           |
|                               | 2015 | 161/526                                       |                                                                                                                                                                                                                                                       |                                                                                                                                                                                                           |
|                               | 2016 | 188/592                                       |                                                                                                                                                                                                                                                       |                                                                                                                                                                                                           |

CARA, Cholangiocarcinoma Aetiology: Role of Asbestos; EAGLE, Environment And Genetics in Lung cancer Etiology; MISEM, Multicentre Italian Study on the Etiology of Mesothelioma; ReNaM, Registro Nazionale Mesoteliomi

**Supplementary Table 1** Pleural mesothelioma odds ratios (OR) and 90% confidence intervals (CI) by length of employment for selected occupations in men in the construction industry (ISIC-71 code 5000), Italy, 2000–2018. Results of the **primary approach** (subjects ever employed in non-construction blue collar occupations for >5 years excluded), **analysis A1**

| Occupation (ISCO-68 code)                                    | Cases | Controls | OR <sup>a</sup> | 90% CI    |
|--------------------------------------------------------------|-------|----------|-----------------|-----------|
| Never employed in construction                               | 2616  | 878      | 1.00            | Reference |
| Length of employment (years)                                 |       |          |                 |           |
| Bricklayers, stonemasons and other construction workers (95) |       |          |                 |           |
| 0.5-19                                                       | 370   | 33       | 3.98            | 2.92-5.43 |
| 20+                                                          | 971   | 45       | 7.11            | 5.47-9.24 |
| <i>P</i> -value for trend                                    |       |          | <0.001          |           |
| <i>P</i> -value for trend, reference category excluded       |       |          | 0.02            |           |
| Bricklayers, stonemasons and tile setters (951)              |       |          |                 |           |
| 0.5-19                                                       | 246   | 14       | 6.72            | 4.24-10.7 |
| 20+                                                          | 788   | 34       | 7.61            | 5.64-10.3 |
| <i>P</i> -value for trend                                    |       |          | <0.001          |           |
| <i>P</i> -value for trend, reference category excluded       |       |          | 0.79            |           |
| Bricklayers (95120)                                          |       |          |                 |           |
| 0.5-19                                                       | 233   | 14       | 6.27            | 3.95-9.96 |
| 20+                                                          | 735   | 29       | 8.25            | 5.98-11.4 |
| <i>P</i> -value for trend                                    |       |          | <0.001          |           |
| <i>P</i> -value for trend, reference category excluded       |       |          | 0.44            |           |
| Construction workers not elsewhere classified (959)          |       |          |                 |           |
| 0.5-19                                                       | 224   | 16       | 4.48            | 2.90-6.93 |
| 20+                                                          | 90    | 6        | 4.78            | 2.36-9.68 |
| <i>P</i> -value for trend                                    |       |          | <0.001          |           |
| <i>P</i> -value for trend, reference category excluded       |       |          | 0.59            |           |
| Electrical wiremen (855)                                     |       |          |                 |           |
| 0.5-19                                                       | 42    | 7        | 2.39            | 1.20-4.75 |
| 20+                                                          | 55    | 9        | 2.30            | 1.25-4.21 |
| <i>P</i> -value for trend                                    |       |          | 0.004           |           |
| <i>P</i> -value for trend, reference category excluded       |       |          | 0.61            |           |
| Plumbers and pipe fitters (871)                              |       |          |                 |           |
| 0.5-19                                                       | 90    | 6        | 5.48            | 2.71-11.1 |
| 20+                                                          | 213   | 6        | 12.56           | 6.31-25.0 |
| <i>P</i> -value for trend                                    |       |          | <0.001          |           |
| <i>P</i> -value for trend, reference category excluded       |       |          | 0.20            |           |
| Painters (931)                                               |       |          |                 |           |
| 0.5-19                                                       | 37    | 7        | 2.33            | 1.16-4.67 |
| 20+                                                          | 64    | 10       | 2.11            | 1.18-3.76 |
| <i>P</i> -value for trend                                    |       |          | 0.007           |           |
| <i>P</i> -value for trend, reference category excluded       |       |          | 0.65            |           |

ISCO, International Standard Classification of Occupations (1968); ISIC, International Standard Industry Classification (1971)

<sup>a</sup>OR calculated with unconditional logistic regression models adjusted for age (categorical) and period

**Supplementary Table 2** Pleural mesothelioma odds ratios (OR) and 90% confidence intervals (CI) for selected occupations in men in the construction industry (ISIC-71 code 5000), Italy, 2000–2018. Results of the **secondary approach** (all subjects included, also those ever employed in non-construction blue collar occupations for >5 years), **analysis A1**

| Occupation (ISCO-68 code)                                          | Cases  | Controls | OR*  | 90% CI    |
|--------------------------------------------------------------------|--------|----------|------|-----------|
| Total                                                              | 15 592 | 2210     |      |           |
| Never employed in construction                                     | 10 863 | 1808     | 1.00 | Reference |
| Ever employed in construction                                      | 4729   | 402      | 2.00 | 1.82-2.21 |
| Blue collars (55, 56, 581, 628, 631, 7-9)                          | 4506   | 342      | 2.24 | 2.02-2.48 |
| Bricklayers, carpenters, and other construction workers (95)       | 2877   | 183      | 2.60 | 2.28-2.98 |
| Bricklayers, stonemasons and tile setters (951)                    | 1921   | 127      | 2.48 | 2.12-2.91 |
| Bricklayers (95120)                                                | 1778   | 118      | 2.44 | 2.07-2.87 |
| Reinforced concreters, cement finishers and terrazzo workers (952) | 35     | 0        | NC   |           |
| Roofers (953)                                                      | 66     | 3        | 4.55 | 1.71-12.1 |
| Carpenters, joiners and parquetry workers (954)                    | 161    | 9        | 3.19 | 1.80-5.65 |
| Plasterers (955)                                                   | 20     | 2        | 1.66 | 0.48-5.81 |
| Insulators (956)                                                   | 122    | 4        | 6.16 | 2.66-14.3 |
| Glaziers (957)                                                     | 1      | 12       | NC   |           |
| Construction workers NEC (959)                                     | 873    | 39       | 3.49 | 2.65-4.60 |
| Other blue collar occupations                                      |        |          |      |           |
| Electrical wiremen (855)                                           | 298    | 40       | 1.38 | 1.03-1.83 |
| Electrical linemen and cable jointers (857)                        | 119    | 8        | 2.64 | 1.44-4.85 |
| Plumbers and pipe fitters (871)                                    | 608    | 31       | 3.54 | 2.60-4.82 |
| Welders and flame-cutters (872)                                    | 18     | 0        | NC   |           |
| Sheet-metal workers (873)                                          | 33     | 1        | 7.06 | 1.32-37.8 |
| Structural metal preparers and erectors (874)                      | 121    | 3        | 7.37 | 2.81-19.4 |
| Painters, construction (931)                                       | 241    | 33       | 1.25 | 0.91-1.71 |
| Crane and hoist operators (973)                                    | 49     | 4        | 2.39 | 1.01-5.67 |
| Earth-moving and related machinery operators (974)                 | 100    | 23       | 0.69 | 0.47-1.03 |
| Motor-vehicle drivers (985)                                        | 70     | 11       | 1.08 | 0.63-1.88 |
| Labourers NEC (999)                                                | 101    | 5        | 3.21 | 1.50-6.88 |

ISCO, International Standard Classification of Occupations (1968); ISIC, International Standard Industry Classification (1971); NC, not calculable; NEC, not elsewhere classified.

\*OR calculated with unconditional logistic regression models adjusted for age (categorical) and period.

**Supplementary Figure 4** Pleural mesothelioma odds ratios (OR) and 90% confidence intervals (CI) for selected occupations in men in the construction industry (ISIC-71 code 5000) in four analyses, Italy, 2000–2018. Results of the **secondary approach** (all subjects included, also those ever employed in non-construction blue collar occupations for >5 years): ever employed in construction, blue collars, and three-digits ISCO-68 unit groups within minor group 95 “Bricklayers, carpenters and other construction workers”. A1: overall analysis using all Italian cases, 2000-2018; A2: analysis with cases selected from the same periods of controls; A3: analysis with cases selected from the same areas of controls; A4: analysis with cases selected from the same periods and areas of controls. In parentheses the International Standard Classification of Occupations (ISCO, 1968) codes.

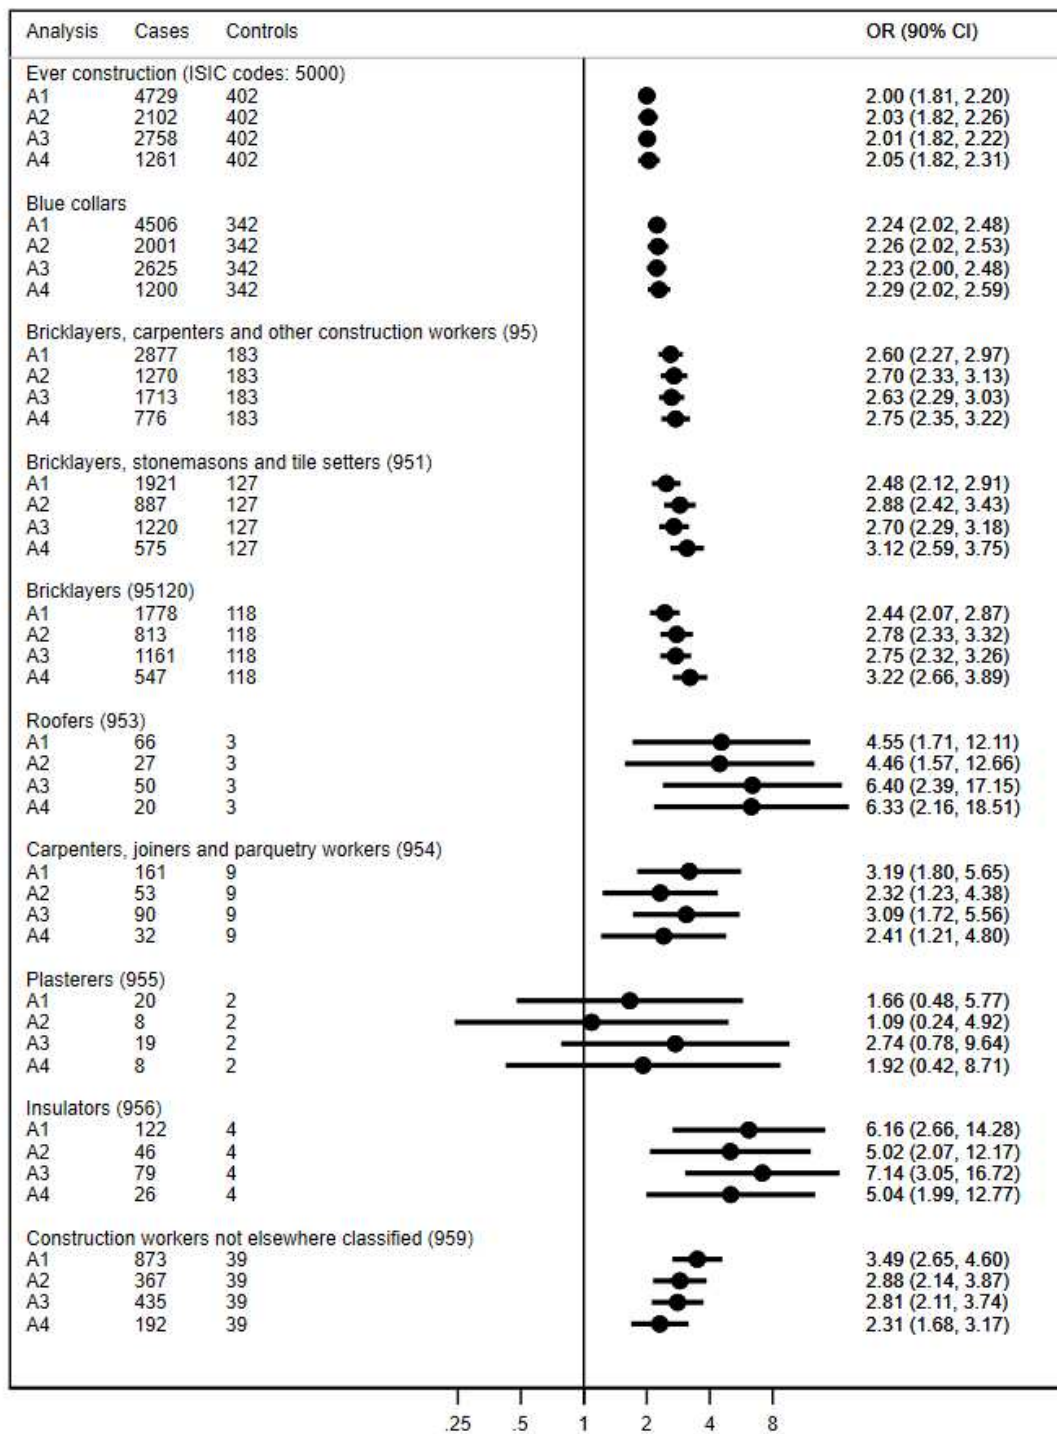

**Supplementary Figure 5** Pleural mesothelioma odds ratios (OR) and 90% confidence intervals (CI) for selected occupations in men in the construction industry (ISIC-71 code 5000) in four analyses, Italy, 2000–2018. Results of the **secondary approach** (all subjects included, also those ever employed in non-construction blue collar occupations for >5 years): other three-digit ISCO-68 unit groups. A1: overall analysis using all Italian cases, 2000-2018; A2: analysis with cases selected from the same periods of controls; A3: analysis with cases selected from the same areas of controls; A4: analysis with cases selected from the same periods and areas of controls. In parentheses the International Standard Classification of Occupations (ISCO, 1968) codes.

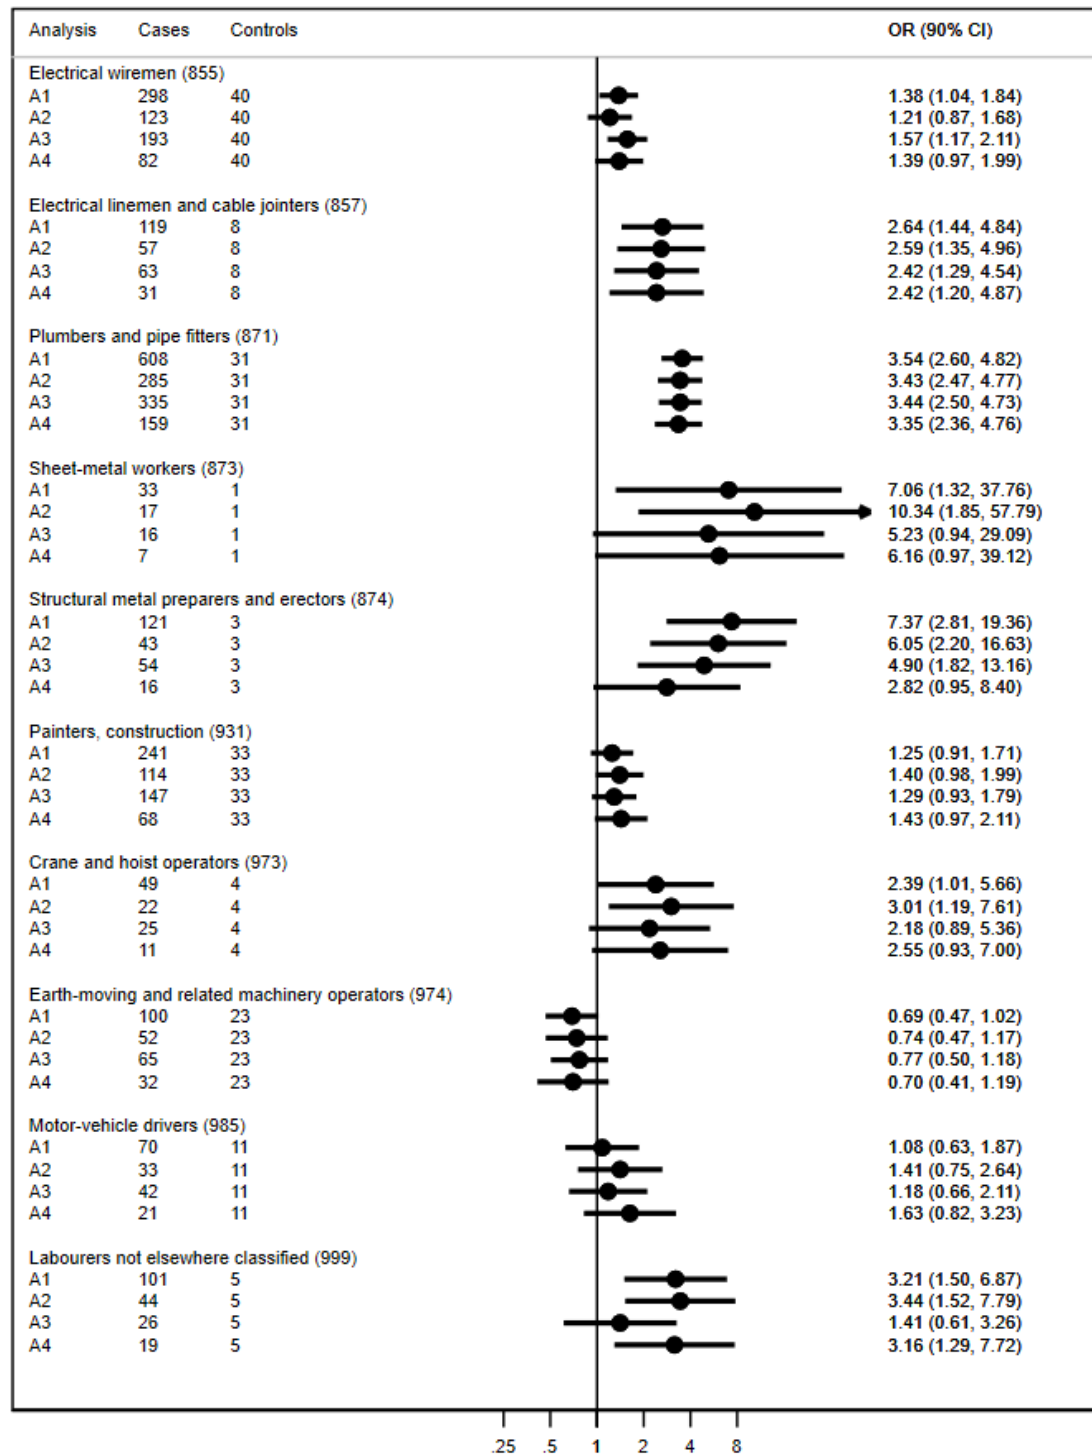

Supplement: bmjopen-2023-073480supp001.pdf [file bmjopen-2023-073480supp001.pdf]
