# Supplementary material for: Pleural mesothelioma risk in the construction industry: a case–control study in Italy, 2000–2018
Source: PubMed Central journal article supplement — BMJ Open. 2023 Aug 11;13(8):e073480. doi: 10.1136/bmjopen-2023-073480 (PMC10423786; doi:10.1136/bmjopen-2023-073480), 2023-08-11
Supplement: bmjopen-2023-073480.draft_revisions.pdf [file bmjopen-2023-073480.draft_revisions.pdf]

# BMJ Open

BMJ Open is committed to open peer review. As part of this commitment we make the peer review history of every article we publish publicly available.

When an article is published we post the peer reviewers' comments and the authors' responses online. We also post the versions of the paper that were used during peer review. These are the versions that the peer review comments apply to.

The versions of the paper that follow are the versions that were submitted during the peer review process. They are not the versions of record or the final published versions. They should not be cited or distributed as the published version of this manuscript.

BMJ Open is an open access journal and the full, final, typeset and author-corrected version of record of the manuscript is available on our site with no access controls, subscription charges or pay-per-view fees (<http://bmjopen.bmj.com>).

If you have any questions on BMJ Open's open peer review process please email [info.bmjopen@bmj.com](mailto:info.bmjopen@bmj.com)

# BMJ Open

## Pleural mesothelioma risk in the construction industry: a case-control study in Italy, 2000-2018

|                               |                                                                                                                                                                                                                                                                                                                                                                                                                                                                                                                                                                                                                                                                                                                                                                                                                                                                                                                                                                                                                                                                                                                                                                                                                                                                                                                                                                                                                                                                                                                                                                                                                                                                                                                                                                                                                                                                                                                                                                                                                                                                                                                                                                                                                                                    |
|-------------------------------|----------------------------------------------------------------------------------------------------------------------------------------------------------------------------------------------------------------------------------------------------------------------------------------------------------------------------------------------------------------------------------------------------------------------------------------------------------------------------------------------------------------------------------------------------------------------------------------------------------------------------------------------------------------------------------------------------------------------------------------------------------------------------------------------------------------------------------------------------------------------------------------------------------------------------------------------------------------------------------------------------------------------------------------------------------------------------------------------------------------------------------------------------------------------------------------------------------------------------------------------------------------------------------------------------------------------------------------------------------------------------------------------------------------------------------------------------------------------------------------------------------------------------------------------------------------------------------------------------------------------------------------------------------------------------------------------------------------------------------------------------------------------------------------------------------------------------------------------------------------------------------------------------------------------------------------------------------------------------------------------------------------------------------------------------------------------------------------------------------------------------------------------------------------------------------------------------------------------------------------------------|
| Journal:                      | <i>BMJ Open</i>                                                                                                                                                                                                                                                                                                                                                                                                                                                                                                                                                                                                                                                                                                                                                                                                                                                                                                                                                                                                                                                                                                                                                                                                                                                                                                                                                                                                                                                                                                                                                                                                                                                                                                                                                                                                                                                                                                                                                                                                                                                                                                                                                                                                                                    |
| Manuscript ID                 | bmjopen-2023-073480                                                                                                                                                                                                                                                                                                                                                                                                                                                                                                                                                                                                                                                                                                                                                                                                                                                                                                                                                                                                                                                                                                                                                                                                                                                                                                                                                                                                                                                                                                                                                                                                                                                                                                                                                                                                                                                                                                                                                                                                                                                                                                                                                                                                                                |
| Article Type:                 | Original research                                                                                                                                                                                                                                                                                                                                                                                                                                                                                                                                                                                                                                                                                                                                                                                                                                                                                                                                                                                                                                                                                                                                                                                                                                                                                                                                                                                                                                                                                                                                                                                                                                                                                                                                                                                                                                                                                                                                                                                                                                                                                                                                                                                                                                  |
| Date Submitted by the Author: | 06-Mar-2023                                                                                                                                                                                                                                                                                                                                                                                                                                                                                                                                                                                                                                                                                                                                                                                                                                                                                                                                                                                                                                                                                                                                                                                                                                                                                                                                                                                                                                                                                                                                                                                                                                                                                                                                                                                                                                                                                                                                                                                                                                                                                                                                                                                                                                        |
| Complete List of Authors:     | <p>Stella, Simona; Fondazione IRCCS Ca' Granda Ospedale Maggiore Policlinico, Occupational Health Unit, Regional Operating Center of Lombardy (COR Lombardia)</p> <p>Consonni, Dario; Fondazione IRCCS Ca' Granda Ospedale Maggiore Policlinico, Occupational Health Unit, Regional Operating Center of Lombardy (COR Lombardia)</p> <p>Migliore, E; CPO and University of Turin, COR Piemonte, Cancer Epidemiology Unit</p> <p>Stura, Antonella; CPO and University of Turin, COR Piemonte, Cancer Epidemiology Unit</p> <p>Cavone, Domenica; University of Bari Aldo Moro, COR Puglia, Section of Occupational Medicine "B. Ramazzini", Department of Interdisciplinary Medicine</p> <p>Vimercati, Luigi; University of Bari Aldo Moro, COR Puglia, Section of Occupational Medicine "B. Ramazzini", Department of Interdisciplinary Medicine</p> <p>Miligi, Lucia; Institute for Cancer Research, Prevention and Clinical Network, COR Toscana, Unit of Environmental and Occupational Epidemiology</p> <p>Piro, Sara; Institute for Cancer Research, Prevention and Clinical Network, COR Toscana, Unit of Environmental and Occupational Epidemiology</p> <p>Landi, Maria Teresa; National Cancer Institute, Division of Cancer Epidemiology and Genetics</p> <p>Caporaso, Neil E. ; National Cancer Institute, Division of Cancer Epidemiology and Genetics</p> <p>Curti, Stefania; University of Bologna, Department of Medical and Surgical Sciences</p> <p>mattioli, stefano; University of Ferrara, Department of Environmental and Prevention Sciences</p> <p>Brandi, Giovanni; University of Bologna, Department of Medical and Surgical Sciences; IRCCS Azienda Ospedaliero-Universitaria di Bologna, Oncology Unit</p> <p>Gioscia, Carmela; Valle d'Aosta Health Local Unit, COR Valle d'Aosta</p> <p>Eccher, Silvia; Provincial Unit of Health, Hygiene and Occupational Medicine, COR Province of Trento</p> <p>Murano, Stefano; Alto Adige Health Local Unit, COR Province of Bolzano</p> <p>Casotto, Veronica; Azienda Zero, COR Veneto, Epidemiological Department</p> <p>Comiati, Vera; Azienda Zero, COR Veneto, Epidemiological Department</p> <p>Negro, Corrado; University of Trieste - Trieste General Hospitals, COR</p> |

|           |                                                                                                                                                                                                                                                                                                                                                                                                                                                                                                                                                                                                                                                                                                                                                                                                                                                                                                                                                                                                                                                                                                                                                                                                                                                                                                                                                                                                                                                                                                                                                                                                                                                                                                                                                                                                                                                                                                                                                                                                                                                                          |
|-----------|--------------------------------------------------------------------------------------------------------------------------------------------------------------------------------------------------------------------------------------------------------------------------------------------------------------------------------------------------------------------------------------------------------------------------------------------------------------------------------------------------------------------------------------------------------------------------------------------------------------------------------------------------------------------------------------------------------------------------------------------------------------------------------------------------------------------------------------------------------------------------------------------------------------------------------------------------------------------------------------------------------------------------------------------------------------------------------------------------------------------------------------------------------------------------------------------------------------------------------------------------------------------------------------------------------------------------------------------------------------------------------------------------------------------------------------------------------------------------------------------------------------------------------------------------------------------------------------------------------------------------------------------------------------------------------------------------------------------------------------------------------------------------------------------------------------------------------------------------------------------------------------------------------------------------------------------------------------------------------------------------------------------------------------------------------------------------|
|           | <p>Friuli-Venezia Giulia, Clinical Unit of Occupational Medicine<br/> D'Agostin, Flavia; University of Trieste - Trieste General Hospitals, COR<br/> Friuli-Venezia Giulia, Clinical Unit of Occupational Medicine<br/> Genova, Carlo; IRCCS Ospedale Policlinico San Martino, UO Clinica di<br/> Oncologia Medica; Università degli Studi di Genova, Dipartimento di<br/> Medicina Interna e Specialità Mediche<br/> Benfatto, Lucia; IRCCS Ospedale Policlinico San Martino, COR Liguria, UO<br/> Epidemiologia Clinica<br/> Romanelli, Antonio; Health Local Unit, COR Emilia-Romagna, Public<br/> Health Department<br/> Grappasonni, Iolanda; University of Camerino, COR Marche, School of<br/> Medicinal and Health Products Sciences<br/> Madeo, Gabriella; Regione Umbria, COR Umbria, Servizio Prevenzione,<br/> Sanità Veterinaria e Sicurezza Alimentare<br/> Cozzi, Ilaria; Lazio Regional Health Service, ASL Roma 1, COR Lazio,<br/> Department of Epidemiology<br/> Romeo, Elisa; Lazio Regional Health Service, ASL Roma 1, COR Lazio,<br/> Department of Epidemiology<br/> Tommaso, Staniscia ; Abruzzo Regional Health Agency (ASR), COR<br/> Abruzzo<br/> Carrozza, Francesco; Registri Tumori Regione Molise, COR Molise<br/> Labianca, Michele; Epidemiologic Regional Center, COR Basilicata<br/> Tallarigo, Federico; Public Health Unit, COR Calabria<br/> Cascone, Giuseppe; Cancer Registry ASP Ragusa and Sicily Regional<br/> Epidemiological Observatory, COR Sicilia<br/> Melis, Massimo; Regional Epidemiological Center, COR Sardegna<br/> Marinaccio, Alessandro; Italian Workers' Compensation Authority<br/> (INAIL), Occupational and Environmental Medicine, Epidemiology and<br/> Hygiene Department<br/> Binazzi, Alessandra; Italian Workers' Compensation Authority (INAIL),<br/> Occupational and Environmental Medicine, Epidemiology and Hygiene<br/> Department<br/> Mensi, Carolina; Fondazione IRCCS Ca' Granda Ospedale Maggiore<br/> Policlinico, Epidemiology Unit<br/> ReNaM, Working Group; ReNaM Working Group</p> |
| Keywords: | OCCUPATIONAL & INDUSTRIAL MEDICINE, Epidemiology < ONCOLOGY,<br>Respiratory tract tumours < ONCOLOGY, EPIDEMIOLOGIC STUDIES                                                                                                                                                                                                                                                                                                                                                                                                                                                                                                                                                                                                                                                                                                                                                                                                                                                                                                                                                                                                                                                                                                                                                                                                                                                                                                                                                                                                                                                                                                                                                                                                                                                                                                                                                                                                                                                                                                                                              |
|           |                                                                                                                                                                                                                                                                                                                                                                                                                                                                                                                                                                                                                                                                                                                                                                                                                                                                                                                                                                                                                                                                                                                                                                                                                                                                                                                                                                                                                                                                                                                                                                                                                                                                                                                                                                                                                                                                                                                                                                                                                                                                          |

SCHOLARONE™  
Manuscripts

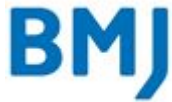

I, the Submitting Author has the right to grant and does grant on behalf of all authors of the Work (as defined in the below author licence), an exclusive licence and/or a non-exclusive licence for contributions from authors who are: i) UK Crown employees; ii) where BMJ has agreed a CC-BY licence shall apply, and/or iii) in accordance with the terms applicable for US Federal Government officers or employees acting as part of their official duties; on a worldwide, perpetual, irrevocable, royalty-free basis to BMJ Publishing Group Ltd ("BMJ") its licensees and where the relevant Journal is co-owned by BMJ to the co-owners of the Journal, to publish the Work in this journal and any other BMJ products and to exploit all rights, as set out in our [licence](#).

The Submitting Author accepts and understands that any supply made under these terms is made by BMJ to the Submitting Author unless you are acting as an employee on behalf of your employer or a postgraduate student of an affiliated institution which is paying any applicable article publishing charge ("APC") for Open Access articles. Where the Submitting Author wishes to make the Work available on an Open Access basis (and intends to pay the relevant APC), the terms of reuse of such Open Access shall be governed by a Creative Commons licence – details of these licences and which [Creative Commons](#) licence will apply to this Work are set out in our licence referred to above.

Other than as permitted in any relevant BMJ Author's Self Archiving Policies, I confirm this Work has not been accepted for publication elsewhere, is not being considered for publication elsewhere and does not duplicate material already published. I confirm all authors consent to publication of this Work and authorise the granting of this licence.

## **Pleural mesothelioma risk in the construction industry: a case-control study in Italy, 2000-2018**

Simona Stella,<sup>1\*</sup> Dario Consonni,<sup>1\*</sup> Enrica Migliore,<sup>2</sup> Antonella Stura,<sup>2</sup> Domenica Cavone,<sup>3</sup> Luigi Vimercati,<sup>3</sup> Lucia Miligi,<sup>4</sup> Sara Piro,<sup>4</sup> Maria Teresa Landi,<sup>5</sup> Neil E Caporaso,<sup>5</sup> Stefania Curti,<sup>6</sup> Stefano Mattioli,<sup>7</sup> Giovanni Brandi,<sup>6,8</sup> Carmela Gioscia,<sup>9</sup> Silvia Eccher,<sup>10</sup> Stefano Murano,<sup>11</sup> Veronica Casotto,<sup>12</sup> Vera Comiati,<sup>12</sup> Corrado Negro,<sup>13</sup> Flavia D'Agostin,<sup>13</sup> Carlo Genova,<sup>14,15</sup> Lucia Benfatto,<sup>16</sup> Antonio Romanelli,<sup>17</sup> Iolanda Grappasonni,<sup>18</sup> Gabriella Madeo,<sup>19</sup> Iliaria Cozzi,<sup>20</sup> Elisa Romeo,<sup>20</sup> Tommaso Staniscia,<sup>21</sup> Francesco Carrozza,<sup>22</sup> Michele Labianca,<sup>23</sup> Federico Tallarigo,<sup>24</sup> Giuseppe Cascone,<sup>25</sup> Massimo Melis,<sup>26</sup> Alessandro Marinaccio,<sup>27</sup> Alessandra Binazzi,<sup>27</sup> Carolina Mensi,<sup>1</sup> RenaM Working Group\*\*

\*Contributed equally to this work

<sup>1</sup>Occupational Health Unit, Regional Operating Center of Lombardy (COR Lombardia), Fondazione IRCCS Ca' Granda Ospedale Maggiore Policlinico, Milan, Italy

<sup>2</sup>COR Piemonte, Cancer Epidemiology Unit, CPO and University of Turin, Turin, Italy

<sup>3</sup>COR Puglia, Section of Occupational Medicine "B. Ramazzini", Department of Interdisciplinary Medicine, University of Bari Aldo Moro, Bari, Italy

<sup>4</sup>COR Toscana, Unit of Environmental and Occupational Epidemiology, Institute for Cancer Research, Prevention and Clinical Network, Firenze, Italy

<sup>5</sup>Division of Cancer Epidemiology and Genetics, National Cancer Institute, Bethesda, MD, USA

<sup>6</sup>Department of Medical and Surgical Sciences, University of Bologna, Italy

<sup>7</sup>Department of Environmental and Prevention Sciences, University of Ferrara, Italy

<sup>8</sup>Oncology Unit, IRCCS Azienda Ospedaliero-Universitaria di Bologna, Italy

<sup>9</sup>COR Valle d'Aosta, Valle d'Aosta Health Local Unit, Aosta, Italy

<sup>10</sup>COR Province of Trento, Provincial Unit of Health, Hygiene and Occupational Medicine, Trento, Italy

<sup>11</sup>COR Province of Bolzano, Alto Adige Health Local Unit, Bolzano, Italy

<sup>12</sup>COR Veneto, Epidemiological Department, Azienda Zero, Veneto Region, Padova, Italy

<sup>13</sup>COR Friuli-Venezia Giulia, Clinical Unit of Occupational Medicine, University of Trieste - Trieste General Hospitals, Trieste, Italy

<sup>14</sup>UO Clinica di Oncologia Medica, IRCCS Ospedale Policlinico San Martino, Genova, Italy

<sup>15</sup>Dipartimento di Medicina Interna e Specialità Mediche, Università degli Studi di Genova, Italy

<sup>16</sup>COR Liguria, UO Epidemiologia Clinica, IRCCS Ospedale Policlinico San Martino, Genova, Italy

<sup>17</sup>COR Emilia-Romagna, Public Health Department, Health Local Unit, Reggio Emilia, Italy

1  
2 <sup>18</sup>COR Marche, School of Medicinal and Health Products Sciences, University of Camerino, Camerino,  
3 Italy

4  
5 <sup>19</sup>COR Umbria, Servizio Prevenzione, Sanità Veterinaria e Sicurezza Alimentare, Regione Umbria,  
6 Perugia, Italy

7  
8 <sup>20</sup>COR Lazio, Department of Epidemiology, Lazio Regional Health Service, ASL Roma 1, Rome, Italy

9  
10 <sup>21</sup>COR Abruzzo, Abruzzo Regional Health Agency (ASR), Pescara, Italy

11  
12 <sup>22</sup>COR Molise, Registri Tumori Regione Molise, Campobasso, Italy

13  
14 <sup>23</sup>COR Basilicata, Epidemiologic Regional Center, Potenza, Italy

15  
16 <sup>24</sup>COR Calabria, Public Health Unit, Crotone, Italy

17  
18 <sup>25</sup>COR Sicilia, Cancer Registry ASP Ragusa and Sicily Regional Epidemiological Observatory, Ragusa,  
19 Italy

20  
21 <sup>26</sup>COR Sardegna. Regional Epidemiological Center, Cagliari, Italy

22  
23 <sup>27</sup>Occupational and Environmental Medicine, Epidemiology and Hygiene Department, Italian Workers'  
24 Compensation Authority (INAIL), Rome, Italy

25  
26  
27  
28 **\*\*ReNaM Working Group members:**

29 Di Marzio D<sup>27</sup> (ReNaM);

30 Richiardi L,<sup>2</sup> Gangemi M,<sup>2</sup> Brentisci C,<sup>2</sup> Gilardetti M,<sup>2</sup> Mirabelli D<sup>2</sup> (COR Piemonte);

31 Bonzini M,<sup>1</sup> Dallari B,<sup>1</sup> Pesatori AC,<sup>1</sup> Rugarli S<sup>1</sup> (COR Lombardia);

32 Fedeli U<sup>12</sup> (COR Veneto);

33 De Michieli P<sup>13</sup> (COR Friuli-Venezia Giulia);

34 Mangone L,<sup>17</sup> Storchi C,<sup>17</sup> Sala O<sup>17</sup> (COR Emilia-Romagna);

35 Cacciarini V,<sup>4</sup> Giovannetti L,<sup>4</sup> Martini A,<sup>4</sup> Elisabetta Chellini<sup>4</sup> (COR Toscana);

36 Pascucci C<sup>18</sup> (COR Marche);

37 Michelozzi P,<sup>20</sup> Davoli M,<sup>20</sup> Ancona L<sup>20</sup>, Balestri A<sup>20</sup> (COR Lazio);

38 Serio G,<sup>3</sup> De Maria L,<sup>3</sup> Caputi A,<sup>3</sup> Delfino MC,<sup>3</sup> Pentimone F<sup>3</sup> (COR Puglia);

39 Lio SG<sup>24</sup> (COR Calabria);

40 Frasca G,<sup>25</sup> Giurdanella MC,<sup>25</sup> Martorana C,<sup>25</sup> Rollo P,<sup>25</sup> Spata E,<sup>25</sup> Dardanoni G,<sup>25</sup> Scondotto S<sup>25</sup> (COR  
41 Sicilia);

42 Nieddu V,<sup>26</sup> Pergola M,<sup>26</sup> Stecchi S<sup>26</sup> (COR Sardegna).

43  
44  
45  
46  
47  
48  
49  
50  
51  
52  
53  
54  
55 **Correspondence to**

56 Dr Dario Consonni, Epidemiology Unit, Fondazione IRCCS Ca' Granda Ospedale Maggiore Policlinico,  
57 Milan, Italy; dario.consonni@unimi.it; dario.consonni@policlinico.mi.it

1  
2 **Key words:** case-control study, asbestos, pleural cancer; mesothelioma, construction industry,  
3  
4 occupations  
5

6  
7 **Word counts:** abstract 242; text: 3095  
8  
9

10  
11  
12  
13  
14  
15  
16  
17  
18  
19  
20  
21  
22  
23  
24  
25  
26  
27  
28  
29  
30  
31  
32  
33  
34  
35  
36  
37  
38  
39  
40  
41  
42  
43  
44  
45  
46  
47  
48  
49  
50  
51  
52  
53  
54  
55  
56  
57  
58  
59  
60

For peer review only

## ABSTRACT

**Objectives** Workers in the construction industry have been exposed to asbestos in various occupations. In Italy, a national mesothelioma registry has been implemented more than 20 years ago. Using a case-control design based on cases from this registry, we estimated relative risks for pleural mesothelioma (PM) among construction workers.

**Methods** We selected male PM incident cases diagnosed in 2000-2018. Population controls were taken from three studies performed in six Italian regions within two periods (2002-2004 and 2012-2016). Age- and period-adjusted unconditional logistic regression models were fitted to estimate odds ratios (ORs) and 90% confidence intervals (CIs) for occupations in the construction industry. The main analysis included all cases. Given the incomplete overlap of cases and controls, we performed three time, space, and time-space restricted sensitivity analyses.

**Results** We included 15,592 incident PM cases and 2,210 controls. OR for blue collar occupations was 2.24 (4,506 cases), mostly bricklayers, stonemasons, and tile setters (1,921 cases, OR 2.48). ORs >2 were found for electrical linemen and cable jointers; plumbers and pipe fitters; structural metal preparers and erectors; roofers; carpenters, joiners and parquetry workers; insulators; general construction workers; crane and hoist operators, and labourers. Moderate increased risks (<2) were estimated for electrical wiremen, painters, and plasterers. Sensitivity analyses yielded similar findings, with few exceptions.

**Conclusions** We found increased pleural mesothelioma risks for most occupations in the construction industry. These findings are relevant for compensation of subjects affected with mesothelioma employed as blue collars in the construction industry.

### What is already known about this subject?

According to the Italian Mesothelioma Registry, the largest mesothelioma burden (16%) occurs in the construction industry. However, relative risks of mesothelioma in this sector has never been investigated at a country-wide level.

### What are the new findings?

Using a case-control design with incomplete overlap of cases and controls (cases diagnosed in Italy in 2000-2018, controls enrolled in six regions in 2002-2004 and 2012-2016), we found elevated risks for most blue collar occupations in construction. Validity of this approach was verified in sensitivity analyses.

### How might this impact on policy or clinical practice in the foreseeable future?

These results are relevant for compensation of mesothelioma patients employed in the construction sector, either with direct or indirect asbestos exposure.



## INTRODUCTION

Asbestos is the generic commercial designation for a group of naturally occurring mineral silicate fibers of the serpentine and amphibole series. These include the serpentine mineral chrysotile (“white asbestos”), and the five amphibole minerals actinolite, amosite (“brown asbestos”), anthophyllite, crocidolite (“blue asbestos”), and tremolite. All forms of asbestos are carcinogenic, causing mesothelioma (any site) and cancer of the lung, larynx, and ovary.<sup>1</sup> Malignant mesothelioma (MM) is a rare and aggressive neoplasm arising from pleura (>90%), peritoneum (<10%), pericardium (<1%), and tunica vaginalis testis (<1%). Notwithstanding the asbestos ban in about 70 countries, due to the long latency between exposure and MM occurrence, the number of MM deaths caused by asbestos in recent years is in the order of 25-38 thousands per year.<sup>2-4</sup>

Italy produced and consumed large quantities of asbestos until the ban in 1992. For this reason, it is among the countries with the highest MM death rates<sup>5 6</sup> and with a high burden of asbestos-related diseases in general.<sup>7</sup> Pleural mesothelioma (PM) incidence and mortality are expected to remain high in the next decades.<sup>8 9</sup> In Italy (decree 308/2002) a national MM registry (Registro Nazionale Mesoteliomi, ReNaM) has been formally established (although some regions had already started registration in the 1990s). ReNaM recorded more than 30,000 MM cases in the period 1993-2018.<sup>10</sup> Construction is among the industries with the largest asbestos use in the past and which is paying the largest toll: out of 17,191 with occupational exposure, 3,574 MM cases (20.8%), almost all men, had been exposed in the construction industry.<sup>10</sup>

Recently, a case-control study in Italy showed elevated PM risks for workers of various industries with a large use of asbestos. For male workers ever employed in the construction industry an odds ratio (OR) of 1.94 was found (119 cases, 77 controls), to which contributed several blue collar occupations.<sup>11</sup>

In this work, we performed a “control-initiated case-control study”<sup>12</sup> to examine more in depth the PM relative risks in male construction workers by exploiting three existing datasets of controls: 1) Controls from the Environment And Genetics in Lung cancer Etiology (EAGLE) study,<sup>13</sup> a large population-based case-control study performed in the Lombardy region in the period 2002-2005 (controls enrolled in 2002-2004), used for PM cases diagnosed in 2000-2009; 2) Controls from the “Multicentre Italian Study on the Etiology of Mesothelioma” MISEM study (quoted in the previous paragraph),<sup>11</sup> a population-based case-control study performed in five Italian regions in the period 2012-2014, used for PM cases diagnosed in 2010-2018; 3) Controls from the “Cholangiocarcinoma Aetiology: Role of Asbestos” (CARA) study (unpublished), a hospital-based case-control study performed in the Emilia-Romagna region in the period 2014-2016, used for PM cases diagnosed in 2010-2018.

We analyzed PM risk for various occupations in the construction sector. In the main analysis we exploited all PM cases recorded in the whole country (60 million people) by the national registry in the period 2000-2018. In this way, we could strengthen and possibly expand MISEM results by covering

1  
2 the whole nation and a wider study period with a larger sample size. In order to verify the reliability of  
3 results, we then performed three sensitivity analyses by applying time, space, and time-space restrictions  
4 to cases in order to more closely match the study base of which controls are a sample. We previously  
5 used a similar approach in two case-control studies on mesothelioma of peritoneum<sup>14</sup> and of pericardium  
6 and tunica vaginalis testis,<sup>15</sup> in which findings using all cases were remarkably similar to those obtained  
7 by applying time and space restrictions.  
8  
9  
10  
11  
12

## 13 14 **METHODS**

### 15 16 **The National Mesothelioma Registry (ReNaM)**

17 The National Mesothelioma Registry (ReNaM) is an epidemiological surveillance programme organized  
18 as a network of regional operating centers (Centri Operativi Regionali, COR). It was formally established  
19 by law 277/1991 in 2002 (although some Italian regions had started in the early 1990s). Report of MM  
20 cases to CORs is compulsory (law 277/1991 and 81/2008). However, since reporting is far from  
21 complete, CORs actively search newly diagnosed cases by exploiting several information sources,  
22 including databases of hospital admissions and mortality, archives of pathology reports, and reports of  
23 occupational diseases. Based on the clinical information, confirmed cases are classified as “definite”  
24 (histological diagnosis, usually with immunohistochemical confirmation), “probable” (usually,  
25 cytological diagnosis and confirmation by positive imaging) or “possible” (positive imaging).  
26  
27  
28  
29  
30  
31  
32

33 MM patients or their next-of-kin are then interviewed (mostly face-to-face) by qualified personnel  
34 using a standardized ReNaM questionnaire which investigates lifetime job history: in particular,  
35 information about industry, occupation, tasks, and the working environment are collected for each job.  
36 Industries and occupations are coded respectively using the Italian classifications of industries (ATECO,  
37 1991) and of occupations (CIP, 1991). The questionnaire also collects lifetime residential histories and  
38 occupational histories of family members.  
39  
40  
41  
42

43 According to ReNaM guidelines, lifetime asbestos exposure is evaluated by experts and classified as  
44 occupational (definite, probable, possible) and (only for non-occupationally exposed cases), extra-  
45 occupational. Subjects with no evidence of asbestos exposure at interview are considered as non-  
46 exposed. This information was not exploited in this paper because the focus is on occupations  
47 (independently from asbestos exposure collected at interview).  
48  
49  
50  
51

### 52 **Controls**

53 We used three sets of controls enrolled in different geographical areas and periods (Figure 1).  
54

55  
56  
57  
58  
59  
60  
Figure 1 here

The first set of controls was taken from the EAGLE study.<sup>13</sup> Controls had been randomly sampled in  
2002-2004 among 1.6 million residents aged 35-79 years in 261 out of 725 municipalities in five  
Lombardy (Northern Italy) provinces (Milan, Monza, Brescia, Pavia and Varese, (3.5 million residents).

1  
2 Subjects underwent a computer assisted personal interview using a questionnaire (available on website  
3 <https://eagle.cancer.gov/questionnaires.html>) which collected information on lifetime occupational  
4 history (industry, occupation, and years of start/stop) for each job carried out for more than six months.  
5

6  
7 The second set of controls came from the MISEM study, conducted in five regions (Lombardy,  
8 Piedmont, and Veneto in Northern Italy, Tuscany in Central Italy, and Apulia in Southern Italy).<sup>11</sup> In  
9 Piedmont the population was limited to residents of the province of Turin and the local health district of  
10 Casale Monferrato. In Veneto the population from the provinces of Padua and Venice was included.  
11 Controls were randomly sampled from residents aged 31-92 years in 2012-2014. Subjects were  
12 interviewed with the ReNaM questionnaire.  
13

14  
15 The third set of controls was taken from the CARA study performed in Emilia-Romagna (Northern  
16 Italy). Subjects were interviewed with a detailed questionnaire including sections taken from the ReNaM  
17 questionnaire.  
18

19  
20 Since CARA controls were few and were enrolled in a period overlapping with MISEM, in statistical  
21 analyses CARA and MISEM controls were pooled together.  
22

## 23 **Cases**

24 From the ReNaM database, we extracted all PM cases diagnosed in the period 2000-2018 with any level  
25 of diagnostic certainty (certain, probable, possible). We divided cases in two main periods of incidence  
26 (2000-2009 and 2010-2018). We subsequently performed three sensitivity analyses by applying time,  
27 space, and time-space restrictions to cases in order to more closely match the study base of controls (see  
28 below).  
29

## 30 **Coding of industries and occupations**

31 The information used for this work consisted simply of industries and occupations and was collected in  
32 a similar way across cases/controls series. Although different persons performed coding, there was some  
33 overlap: for cases and MISEM/CARA controls the coders were the same within participating regions;  
34 in Lombardy, EAGLE controls and MISEM cases and controls were coded by the same person.  
35

36 With regard to controls in all three studies, industries and occupations had been coded following the  
37 International Standard Industrial Classification of All Economic Activities (ISIC, 1971) and the  
38 International Standard Classification of Occupations (ISCO, 1968),<sup>16</sup> respectively. Work histories of  
39 controls in the MISEM study had been coded using both Italian and International classifications of  
40 industries (ATECO-91 and ISIC-71) and occupations (CIP-91 and ISCO-68).  
41

42 For cases in the ReNaM database, we exploited a recently developed crosswalk to translate Italian  
43 CIP-91 codes of occupations into ISCO-68 codes.<sup>17</sup> To improve comparability of cases and controls, we  
44 applied the crosswalk also to MISEM controls.  
45

## 46 **Statistical analysis**

1  
2 We assessed the relative risks of PM associated with ever employment in construction industry (ISIC-  
3 71 code 5000 or the corresponding ATECO-91 code 45). The majority of construction workers were  
4 men, so women were excluded from analyses. We performed analyses for selected occupations and  
5 groups of occupations, with subjects ever employed in multiple occupations included in each analysis.  
6  
7 We considered results with at least 2 cases and 2 controls.  
8  
9

10 Unconditional logistic regression models adjusted for age (<50, 50-54, 55-59, 60-64, 65-69, 70-74,  
11 75-79, 80-84, 85+) and period (two periods, 2000-2009 and 2010-2018) were fitted to calculate ORs.  
12 We calculated 90% confidence intervals (CI) in order to avoid a reductive interpretation of CIs as  
13 significance tests.<sup>18</sup> The reference group was made up of subjects never employed in the construction  
14 industry.  
15  
16  
17  
18

19 We performed the following four analyses:

- 20 1) Analysis 1 (A1). Overall analysis in which we included all cases recorded by ReNaM in 2000-2009  
21 (exploiting EAGLE controls) and 2010-2018 (exploiting MISEM and CARA controls pooled together);
- 22 2) Analysis 2 (A2). Temporally restricted analyses in which we included only cases first diagnosed in  
23 the same years of enrolment of EAGLE (2002-2004) or MISEM/CARA (2012-2016) controls;
- 24 3) Analysis 3 (A3). Spatially restricted analysis, in which we included only cases living in the same  
25 Lombardy Provinces of EAGLE (2000-2009) and in the same six regions of MISEM/CARA (2010-  
26 2018) controls;
- 27 4) Analysis 4 (A4). Temporally and spatially restricted analysis, in which we applied both restrictions  
28 of analyses A2 and A3, i.e., cases 2002-2004 living in the same Lombardy Provinces of EAGLE controls  
29 and cases 2012-2016 living in the same regions of MISEM/CARA controls. This analysis is theoretically  
30 preferable (although based on a smaller sample size) because cases match more closely the study base  
31 (the population-time source of controls).  
32

33 All analyses were performed using Stata 17 (Stata Corp. 2021, College Station, TX, USA).  
34

35 We used existing datasets of cases and control. Therefore, subjects could not be involved in the  
36 design, or conduct, or reporting, or dissemination plans of our research  
37  
38  
39  
40  
41

## 42 **RESULTS**

43 For the period 2000-2018, 15,592 records for men with PM were extracted from the ReNaM database,  
44 7,985 (51.2%) in the period 2000-2009 and 7,607 in 2010-2018 (Figure 1). EAGLE controls (2002-  
45 2004) were 1,617, while MISEM/CARA controls (2012-2016) were 603 (490 from MISEM, 103 from  
46 CARA).  
47

48 In the whole study period there were 4,729 (30.3%) out of 15,592 PM cases ever employed in the  
49 construction industry (ISIC code 5000), while controls were 402 (18.2%) among 2,210 (Table 1). The  
50 proportions of ever employed in construction were remarkably similar in the two periods: among cases,  
51  
52  
53  
54  
55  
56  
57  
58  
59  
60

2,372 (29.7%) out of 7,985 in 2000-2009 and 2,357 (31.0%) out of 7,607 in 2010-2018; among EAGLE controls, 299 (18.5%) out of 1,617 in 2002-2004 and 103 (17.4%) out of 593 MISEM/CARA controls in 2012-2016.

In both periods the distribution of cases by age was fairly similar to that of controls. The majority of cases (9,195, 59.9%) completed a personal interview with the ReNaM questionnaire. A definite diagnosis was available for 13,368 cases (85.7%). Most cases (9,499, 60.9%) were of the epithelioid histotype.

**Table 1** Characteristics of pleural mesothelioma cases and controls in men ever/never employed in the construction industry, Italy, 2000–2018.

|                     | Ever construction |       |          |       | Never construction |       |          |       | Total  |       |          |       |
|---------------------|-------------------|-------|----------|-------|--------------------|-------|----------|-------|--------|-------|----------|-------|
|                     | Cases             |       | Controls |       | Cases              |       | Controls |       | Cases  |       | Controls |       |
|                     | N                 | %     | N        | %     | N                  | %     | N        | %     | N      | %     | N        | %     |
| Total               | 4,729             | 100   | 402      | 100   | 10,863             | 100   | 1,808    | 100   | 15,592 | 100.0 | 2,210    | 100   |
| Period              |                   |       |          |       |                    |       |          |       |        |       |          |       |
| <2010               | 2,372             | 50.2  | 299      | 74.4  | 5,613              | 51.7  | 1,318    | 72.9  | 7,985  | 51.2  | 1,617    | 73.2  |
| 2010+               | 2,357             | 49.8  | 103      | 25.6  | 5,250              | 48.3  | 490      | 27.1  | 7,607  | 48.8  | 593      | 26.8  |
| Age (years)         |                   |       |          |       |                    |       |          |       |        |       |          |       |
| <50                 | 112               | 2.4   | 17       | 4.2   | 272                | 2.5   | 90       | 5.0   | 384    | 2.5   | 107      | 4.8   |
| 50-54               | 171               | 3.6   | 25       | 6.2   | 359                | 3.3   | 98       | 5.4   | 530    | 3.4   | 123      | 5.6   |
| 55-59               | 360               | 7.6   | 48       | 11.9  | 767                | 7.1   | 223      | 12.3  | 1,127  | 7.2   | 271      | 12.3  |
| 60-64               | 553               | 11.7  | 66       | 16.4  | 1,344              | 12.4  | 304      | 16.8  | 1,897  | 12.2  | 370      | 16.7  |
| 65-69               | 858               | 18.1  | 98       | 24.4  | 1,825              | 16.8  | 435      | 24.1  | 2,683  | 17.2  | 533      | 24.1  |
| 70-74               | 966               | 20.4  | 91       | 22.6  | 2,192              | 20.2  | 371      | 20.5  | 3,158  | 20.3  | 462      | 20.9  |
| 75-79               | 926               | 19.6  | 45       | 11.2  | 2,107              | 19.4  | 234      | 12.9  | 3,033  | 19.5  | 279      | 12.6  |
| 80-84               | 538               | 11.4  | 10       | 2.5   | 1,282              | 11.8  | 36       | 2.0   | 1,820  | 11.7  | 46       | 2.1   |
| 85+                 | 245               | 5.2   | 2        | 0.5   | 715                | 6.6   | 17       | 0.9   | 960    | 6.2   | 19       | 0.9   |
| Mean (SD)           | 70.4              | (9.5) | 66.2     | (8.7) | 70.7               | (9.8) | 66.1     | (9.1) | 70.6   | (9.7) | 66.1     | (9.0) |
| Interview           |                   |       |          |       |                    |       |          |       |        |       |          |       |
| Direct              | 2,933             | 62.0  | 402      | 100   | 6,262              | 57.7  | 1,808    | 100   | 9,195  | 59.0  | 2,210    | 100   |
| Next-of-kin         | 1,709             | 36.1  |          |       | 4,242              | 39.1  |          |       | 5,951  | 38.2  |          |       |
| None                | 78                | 1.7   |          |       | 278                | 2.6   |          |       | 356    | 2.3   |          |       |
| Other               | 9                 | 0.2   |          |       | 81                 | 0.8   |          |       | 90     | 0.6   |          |       |
| Diagnosis           |                   |       |          |       |                    |       |          |       |        |       |          |       |
| Definite            | 4,117             | 87.1  |          |       | 9,251              | 85.2  |          |       | 13,368 | 85.7  |          |       |
| Probable            | 347               | 7.3   |          |       | 802                | 7.4   |          |       | 1,149  | 7.4   |          |       |
| Possible            | 265               | 5.6   |          |       | 810                | 7.5   |          |       | 1,075  | 6.9   |          |       |
| Morphology*         |                   |       |          |       |                    |       |          |       |        |       |          |       |
| Epithelioid (90253) | 2,897             | 61.3  |          |       | 6,602              | 60.8  |          |       | 9,499  | 60.9  |          |       |
| Sarcomatoid (90513) | 479               | 10.1  |          |       | 1,007              | 9.3   |          |       | 1,486  | 9.5   |          |       |
| Biphasic (90533)    | 583               | 12.3  |          |       | 1,237              | 11.4  |          |       | 1,820  | 11.7  |          |       |
| NOS (90503)         | 450               | 9.5   |          |       | 1,081              | 10.0  |          |       | 1,531  | 9.8   |          |       |
| Not available       | 320               | 6.8   |          |       | 936                | 8.6   |          |       | 1,256  | 8.1   |          |       |

\*Codes of the International Classification of Diseases for Oncology, Third Edition in parentheses; NOS, not otherwise specified

In the overall analysis (A1) which included all cases recorded in Italy in 2000-2018, an OR of 2.00 was calculated for subjects ever employed in construction (4,729 cases) (Table 2). This increase was driven by numerous blue collars occupations (OR 2.24), including: electrical linemen and cable jointers (OR 2.64); plumbers and pipe fitters (OR 3.54); structural metal preparers and erectors (OR 7.37); bricklayers, stonemasons and tile setters (OR 2.48), in particular bricklayers, by far the most represented

1  
2 occupation (1,778 cases, OR 2.44); roofers (OR 4.55); carpenters, joiners and parquetry workers (OR  
3 3.19); insulators (OR 6.16); construction workers not elsewhere classified (OR 3.49); crane and hoist  
4 operators (OR 2.39) and labourers not elsewhere classified (OR 3.21). Moderate increased risks were  
5 estimated for electrical wiremen (OR 1.38), painters (OR 1.25), and plasterers (OR 1.66).  
6  
7

8  
9 **Table 2** Pleural mesothelioma odds ratios (OR) and 90% confidence intervals (CI) for selected occupations in men in the  
10 construction industry (ISIC 5000), Italy, 2000–2018.

| Occupation (ISCO code)                              | Cases  | Controls | OR <sup>a</sup> | 90% CI    |
|-----------------------------------------------------|--------|----------|-----------------|-----------|
| Total                                               | 15,592 | 2,210    |                 |           |
| Never employed in construction                      | 10,863 | 1,808    | 1.00            | Reference |
| Ever employed in construction                       | 4,729  | 402      | 2.00            | 1.82-2.21 |
| White collars                                       | 307    | 64       | 0.86            | 0.68-1.09 |
| Blue collars (55, 56, 581, 628, 631, 7-9)           | 4,506  | 342      | 2.24            | 2.02-2.48 |
| Electrical wiremen (855)                            | 298    | 40       | 1.38            | 1.03-1.83 |
| Electrical linemen and cable jointers (857)         | 119    | 8        | 2.64            | 1.44-4.85 |
| Plumbers and pipe fitters (871)                     | 608    | 31       | 3.54            | 2.60-4.82 |
| Structural metal preparers and erectors (874)       | 121    | 3        | 7.37            | 2.81-19.4 |
| Painters, construction (931)                        | 241    | 33       | 1.25            | 0.91-1.71 |
| Bricklayers, stonemasons and tile setters (951)     | 1,921  | 127      | 2.48            | 2.12-2.91 |
| Bricklayers (95120)                                 | 1,778  | 118      | 2.44            | 2.07-2.87 |
| Roofers (953)                                       | 66     | 3        | 4.55            | 1.71-12.1 |
| Carpenters, joiners and parquetry workers (954)     | 161    | 9        | 3.19            | 1.80-5.65 |
| Plasterers (955)                                    | 20     | 2        | 1.66            | 0.48-5.81 |
| Insulators (956)                                    | 122    | 4        | 6.16            | 2.66-14.3 |
| Construction workers not elsewhere classified (959) | 873    | 39       | 3.49            | 2.65-4.60 |
| Crane and hoist operators (973)                     | 49     | 4        | 2.39            | 1.01-5.67 |
| Earth-moving and related machinery operators (974)  | 100    | 23       | 0.69            | 0.47-1.03 |
| Motor-vehicle drivers (985)                         | 70     | 11       | 1.08            | 0.63-1.88 |
| Labourers not elsewhere classified (999)            | 101    | 5        | 3.21            | 1.50-6.88 |

33 ISCO, International Classification of Occupations (1968); ISIC, International Standard Industry Classification  
34 (1971)

35 <sup>a</sup>OR calculated with unconditional logistic regression models adjusted for age (categorical) and period

36  
37 Most findings were highly comparable with those estimated in time (A2) or space (A3) restricted  
38 analyses (Supplementary Figures 1-2, Supplementary Tables 1-2) and in the analysis in which both time  
39 and space restrictions were applied (A4, Supplementary Figure 3 and Supplementary Table 3). Figure 2  
40 shows the general good agreement across the four analyses, with the exception of motor-vehicle drivers  
41 (no increase in the overall analysis A1, increased risk analysis A4).  
42  
43  
44

45 Figure 2 here

## 46 DISCUSSION

47  
48 In this nationwide Italian study we found in males an elevated risk of pleural mesothelioma for most  
49 blue collar occupations in the construction industry, in particular (in order of number of cases):  
50 bricklayers; general construction workers (i.e., construction workers not elsewhere classified); plumbers  
51 and pipe fitters; electrical wiremen; painters; carpenters; joiner and parquetry workers; insulators;  
52 structural metal preparers an erectors; electrical linemen and cable jointers; labourers; roofers; crane and  
53 hoist operators; and plasterers. Findings were in general consistent across various supplementary  
54 analyses with different study base samples except for motor-vehicle drivers, for which risk was not  
55  
56  
57  
58  
59

1  
2 elevated in the overall analysis but was increased in the in the theoretically preferable time and space  
3 restricted analysis.  
4

5 Our findings are in agreement with many studies published in various countries. Just to name a few,  
6 studies that showed increased mesothelioma risks in the construction sector and in various occupations  
7 therein were performed in Canada,<sup>19</sup> France,<sup>20</sup> Italy,<sup>11</sup> Spain,<sup>21</sup> Nordic countries,<sup>22-25</sup> UK,<sup>26-28</sup> and USA.<sup>29</sup>  
8  
9  
10  
11  
12  
13  
14  
15  
16  
17  
18  
19  
20  
21  
22  
23  
24  
25  
26  
27  
28  
29  
30  
31  
32  
33  
34  
35  
36  
37  
38  
39  
40  
41  
42  
43  
44  
45  
46  
47  
48  
49  
50  
51  
52  
53  
54  
55  
56  
57  
58  
59  
60

<sup>30</sup> Our results are largely plausible. Asbestos (all forms) has been widely used worldwide in the construction industry due to its physical properties (flame-retardant, sound-absorbing, electrical and heat resistance) in insulation works (e.g., pipes, chimneys) and to build roofs with corrugated asbestos-cement sheets. In Europe, estimates of the number of workers exposed to asbestos have been developed by CAREX (CARcinogen EXposure). Based on data collected during 1990-1993, it has been estimated that, out of a total of 1.2 million workers exposed to asbestos, those employed in the construction industry were 574,000<sup>1</sup> and that 5.2% of male workers in construction industry were exposed to asbestos.<sup>31</sup> Some occupational groups used asbestos directly (e.g., insulators and roofers, plumbers and pipe fitters), while other might have been exposed indirectly because they worked in areas where other workers handled asbestos (e.g., electricians, carpenters, painters, concrete workers, maintenance workers).<sup>32</sup> Finally, many workers have been exposed because involved in removal of asbestos-containing materials. It should be added that preventive measures (technical, organizational, and personal) are difficult to implement in this complex sector in which several tasks are performed by different workers within shared and always changing environments, especially in small or medium size companies.

Therefore, due to the large number of workers and the difficulty of implementing preventive measures, the construction industry suffers the largest mesothelioma burden in many countries. For instance, a study in UK estimated that asbestos was responsible for more than half of the cancer registrations in construction and 70% of cancer deaths (2,568 deaths, including 1,249 lung cancers and 1,292 mesotheliomas).<sup>33</sup> In Italy, in the period 1993-2018, the construction industry ranked first in the number of mesothelioma cases (3,574, 16.2%) reported to ReNaM, including 1,332 bricklayers, 383 general construction workers, 232 plumbers and pipe fitters, 140 stonemasons, 117 electricians, and 114 insulators.<sup>34</sup> Moreover, the proportion of cases among construction workers showed an increasing trend from 15.8% in the 1993-1998 period to 23.9% in 2014-2018.<sup>10</sup>

### **Asbestos exposure after the asbestos ban (1992)**

Findings in this study mostly concern exposure occurred before the asbestos ban in 1992. However, it has been estimated that more than 30 million tons of asbestos-containing material was installed in the Italian territory in 1992 and that about 23 million tons are yet to be reclaimed.<sup>35</sup> In an update of CAREX for Italy (2000-2003) it was estimated that 70,000 workers were still exposed to asbestos.<sup>36</sup> Hence, asbestos exposure continued to occur after the ban and may do in future years or decades unless adequate

1  
2 preventive measures are used during asbestos removal. A recent study in Italy covering the period 1996-  
3 2013 showed that workers employed in the removal and disposal of asbestos-containing materials may  
4 be exposed to asbestos levels above the national action limit (0.01 fibers/cc) and occasionally also the  
5 European action limit at 0.1 fibers/cc.<sup>37</sup>  
6  
7

### 8 **Strengths and limitations**

9  
10 The study has several strengths. First, the pleural mesothelioma case series was extracted from the  
11 database of a national registry (ReNaM) in which active search for MM cases is performed according to  
12 common procedures: in particular, standardized criteria are used for MM diagnosis classification and  
13 collection and evaluation of lifetime job histories collected by a structured questionnaire.<sup>10</sup> Second, our  
14 study included MM cases from the whole country and covered a large time window (2000-2018). This  
15 was possible thanks to a recently developed crosswalk which allowed translation of thousands of Italian  
16 codes of occupations into international (ISCO-68) codes.<sup>17</sup> Third, we used three control series for the  
17 large majority (95.3%) randomly sampled from the general population (EAGLE and MISEM studies).  
18  
19

20  
21 The study has some limitations. First, although the three control series covered about 30 million  
22 people (half of the Italian population) over eight years, the overlap of cases with controls was only  
23 partial. However, the various time and space restricted supplementary analyses produced quite consistent  
24 results, with few exceptions, showing that theoretically less preferable samples of the study base  
25 performed quite well in practice. This is in agreement with previous studies on peritoneal mesothelioma  
26 in Lombardy<sup>14</sup> and on mesothelioma of pericardium and tunica vaginalis testis in Italy.<sup>15</sup> A similar  
27 approach, though criticized, proved to be valid also in case-control studies on pleural mesothelioma in  
28 France.<sup>38-40</sup> A second limitation regard information quality, since in the various studies different  
29 persons performed data collection. However, the personnel was adequately trained and we used  
30 only simple information on industries and occupations: hence, we do not expect substantially  
31 different accuracy across studies and case-control status. Conversely, errors in coding occupations  
32 are a possibility because the codes were in part assigned by different persons or by a crosswalk,  
33 which likely caused some degree of misclassification of occupations.  
34  
35  
36  
37  
38  
39  
40  
41  
42  
43  
44  
45  
46  
47

### 48 **CONCLUSIONS**

49  
50 This work was made possible thanks to data collected through an epidemiological surveillance system  
51 of mesothelioma covering the whole Italian territory since more than 20 years. In this nationwide case-  
52 control study with almost all controls sampled from the general population, we found increased pleural  
53 mesothelioma risk for most occupations in the construction industry. This is largely plausible given the  
54 past widespread use of asbestos in this economic sector and is consistent with findings in international  
55 literature. Our results are relevant for compensation of blue collar workers affected with mesothelioma  
56 in the construction industry.  
57  
58  
59  
60



1  
2 Given that huge amounts of asbestos-containing materials are still present in the environment, the  
3 potential for asbestos exposure still exists if adequate technical, organizational, and personal preventive  
4 measures are not taken during asbestos manipulation. In the future special attention to surveillance of  
5 mesothelioma (and other asbestos-related diseases like lung cancer) must be given for workers employed  
6 in asbestos removal after the asbestos ban in 1992.  
7  
8  
9

10  
11  
12 **Acknowledgements** The authors thank all personnel involved in epidemiological surveillance of  
13 mesothelioma incidence and asbestos exposure assessment and the affected subjects and their family  
14 members for granting interviews.  
15  
16

17  
18  
19 **Contributors** SS: statistical analysis, manuscript drafting; DC, conceptualization, study design,  
20 statistical supervision, manuscript drafting; EM: manuscript drafting and statistical analysis (MISEM  
21 study); DCa, LV: data collection (MISEM study); MTL, NEC: principal investigators (EAGLE study);  
22 SC, SM, GB: principal investigators, data collection (CARA study); AS, LM, SP, CG, SE, SMu, VC,  
23 VCo, CN, FDA, CGe, LB, AR, IG, GM, IC, ER, TS, FC, ML, FT, GC, MM: data collection (Regional  
24 Operating Centers); AM: director (ReNaM), study conceptualization; AB: data management (ReNaM);  
25 CM: study design, data collection, manuscript drafting. All authors contributed to interpretation of  
26 findings and discussion. All authors revised and approved the manuscript for intellectual content.  
27  
28  
29  
30  
31  
32

33  
34  
35 **Funding** This work was partially supported by the Istituto Nazionale per l'Assicurazione contro gli  
36 Infortuni sul Lavoro (INAIL), Rome, Italy: Project BRIC ID 55 (2019).  
37  
38

39  
40 **Competing interests** DC, SM, CM served as consultants in trials concerning asbestos-related diseases.  
41  
42

43 **Patient consent for publication** As reporting of mesothelioma to the National Mesothelioma Registry  
44 (ReNaM) is compulsory by law (277/1991 and 81/2008), patient consent is not required for cases. In the  
45 EAGLE, MISEM, and CARA studies, enrolled subjects signed and informed consent form.  
46  
47  
48

49  
50 **Ethical approval** The EAGLE, MISEM, and CARA studies were approved by the following  
51 institutional review boards (IRBs): National Cancer Institute Special Studies IRB: 01-C-N211, National  
52 Cancer Institute, Bethesda, Maryland, USA (EAGLE); Comitato Etico Interaziendale, AOU San  
53 Giovanni Battista di Torino and AO CTO/MariaAdelaide di Torino, Turin, Italy: CEI-589 (MISEM);  
54 Comitato Etico del Policlinico di Sant'Orsola, Bologna, Italy: 111/2013/U/OssN (CARA).  
55  
56  
57  
58

59  
60 **Provenance and peer review** Not commissioned; externally peer reviewed

1  
2  
3  
4 **Data availability statement** Data are not publicly available.

5 **ORCID iDs**

6  
7 Simona Stella <http://orcid.org/0000-0003-4276-2583>  
8  
9 Dario Consonni <http://orcid.org/0000-0002-8935-3843>  
10  
11 Enrica Migliore <http://orcid.org/0000-0003-0121-6295>  
12  
13 Domenica Cavone <http://orcid.org/0000-0002-2009-1806>  
14  
15 Luigi Vimercati <http://orcid.org/0000-0002-4072-2871>  
16  
17 Lucia Miligi <http://orcid.org/0000-0002-8223-485X>  
18  
19 Sara Piro <http://orcid.org/0000-0003-4198-7035>  
20  
21 Neil E Caporaso <http://orcid.org/0000-0001-7562-4609>  
22  
23 Stefania Curti <http://orcid.org/0000-0003-4343-8873>  
24  
25 Stefano Mattioli <http://orcid.org/0000-0002-9639-7430>  
26  
27 Giovanni Brandi <http://orcid.org/0000-0003-0013-2858>  
28  
29 Corrado Negro <http://orcid.org/0000-0002-2007-3608>  
30  
31 Carlo Genova <http://orcid.org/0000-0003-3690-8582>  
32  
33 Antonio Romanelli <http://orcid.org/0000-0003-4899-1889>  
34  
35 Iolanda Grappasonni <http://orcid.org/0000-0003-1131-4286>  
36  
37 Ilaria Cozzi <http://orcid.org/0000-0003-0313-9799>  
38  
39 Tommaso Staniscia <http://orcid.org/0000-0002-5077-515X>  
40  
41 Federico Tallarigo <http://orcid.org/0000-0002-4131-9531>  
42  
43 Alessandro Marinaccio <http://orcid.org/0000-0001-9068-2137>  
44  
45 Alessandra Binazzi <http://orcid.org/0000-0002-0435-600X>  
46  
47 Carolina Mensi <http://orcid.org/0000-0002-9075-3684>  
48  
49  
50  
51  
52  
53  
54  
55  
56  
57  
58  
59  
60

## REFERENCES

1. IARC Monographs on the Evaluation of Carcinogenic Risks to Humans. *Arsenic, Metals, Fibres, and Dusts*. Lyon, France: International Agency for Research on Cancer, 2012.
2. Global, regional, and national comparative risk assessment of 84 behavioural, environmental and occupational, and metabolic risks or clusters of risks for 195 countries and territories, 1990-2017: a systematic analysis for the Global Burden of Disease Study 2017. *Lancet* 2018;392(10159):1923-94.
3. GBD 2016 Occupational Carcinogens Collaborators. Global and regional burden of cancer in 2016 arising from occupational exposure to selected carcinogens: a systematic analysis for the Global Burden of Disease Study 2016. *Occup Environ Med* 2020;77(3):151-9.
4. Odgerel CO, Takahashi K, Sorahan T, *et al*. Estimation of the global burden of mesothelioma deaths from incomplete national mortality data. *Occup Environ Med* 2017;74(12):851-8.
5. Park EK, Takahashi K, Hoshuyama T, *et al*. Global magnitude of reported and unreported mesothelioma. *Environ Health Perspect* 2011;119(4):514-8.
6. Rath EM, Yuen ML, Odgerel CO, *et al*. The Ecological Association between Asbestos Consumption and Asbestos-Related Diseases 15 Years Later. *Environ Health Perspect* 2022;130(5):57703.
7. Fazzo L, Binazzi A, Ferrante D, *et al*. Burden of Mortality from Asbestos-Related Diseases in Italy. *Int J Environ Res Public Health* 2021;18(19).
8. Oddone E, Bollon J, Nava CR, *et al*. Predictions of Mortality from Pleural Mesothelioma in Italy After the Ban of Asbestos Use. *Int J Environ Res Public Health* 2020;17(2).
9. Oddone E, Bollon J, Nava CR, *et al*. Effect of Asbestos Consumption on Malignant Pleural Mesothelioma in Italy: Forecasts of Mortality up to 2040. *Cancers (Basel)* 2021;13(13).
10. Binazzi A, Di Marzio D, Verardo M, *et al*. Asbestos Exposure and Malignant Mesothelioma in Construction Workers-Epidemiological Remarks by the Italian National Mesothelioma Registry (ReNaM). *Int J Environ Res Public Health* 2021;19(1).
11. Migliore E, Consonni D, Peters S, *et al*. Pleural mesothelioma risk by industry and occupation: results from the Multicentre Italian Study on the Etiology of Mesothelioma (MISEM). *Environ Health* 2022;21(1):60.
12. Greenland S. Control-initiated case-control studies. *Int J Epidemiol* 1985;14(1):130-4.
13. Landi MT, Consonni D, Rotunno M, *et al*. Environment And Genetics in Lung cancer Etiology (EAGLE) study: an integrative population-based case-control study of lung cancer. *BMC Public Health* 2008;8:203.
14. Consonni D, Calvi C, De Matteis S, *et al*. Peritoneal mesothelioma and asbestos exposure: a population-based case-control study in Lombardy, Italy. *Occup Environ Med* 2019;76(8):545-53.
15. Marinaccio A, Consonni D, Mensi C, *et al*. Association between asbestos exposure and pericardial and tunica vaginalis testis malignant mesothelioma: a case-control study and epidemiological remarks. *Scand J Work Environ Health* 2020;46(6):609-17.
16. Consonni D, De Matteis S, Lubin JH, *et al*. Occupational risks for lung cancer in a population-based case-control study. *Am J Epidemiol* 2010;171(3):323-33.

17. Spinazze A, Consonni D, Borghi F, *et al.* Development of a Crosswalk to Translate Italian Occupation Codes to ISCO-68 Codes. *Ann Work Expo Health* 2022;66(6):815-21.
18. Sterne JA, Davey Smith G. Sifting the evidence-what's wrong with significance tests? *BMJ* 2001;322(7280):226-31.
19. DeBono NL, Warden H, Logar-Henderson C, *et al.* Incidence of mesothelioma and asbestosis by occupation in a diverse workforce. *Am J Ind Med* 2021;64(6):476-87.
20. Rolland P, Gramond C, Lacourt A, *et al.* Occupations and industries in France at high risk for pleural mesothelioma: A population-based case-control study (1998-2002). *Am J Ind Med* 2010;53(12):1207-19.
21. Agudo A, Gonzalez CA, Bleda MJ, *et al.* Occupation and risk of malignant pleural mesothelioma: A case-control study in Spain. *Am J Ind Med* 2000;37(2):159-68.
22. Plato N, Martinsen JI, Sparen P, *et al.* Occupation and mesothelioma in Sweden: updated incidence in men and women in the 27 years after the asbestos ban. *Epidemiol Health* 2016;38:e2016039.
23. Pukkala E, Martinsen JI, Lynge E, *et al.* Occupation and cancer - follow-up of 15 million people in five Nordic countries. *Acta Oncol* 2009;48(5):646-790.
24. Jarvholm B, Englund A. The impact of asbestos exposure in Swedish construction workers. *Am J Ind Med* 2014;57(1):49-55.
25. Engholm G, Englund A. Asbestos hazard in the Swedish construction industry--recent trends in mesothelioma incidence. *Scand J Work Environ Health* 2005;31 Suppl 2:27-30.
26. Coggon D, Inskip H, Winter P, *et al.* Differences in occupational mortality from pleural cancer, peritoneal cancer, and asbestosis. *Occup Environ Med* 1995;52(11):775-7.
27. Rake C, Gilham C, Hatch J, *et al.* Occupational, domestic and environmental mesothelioma risks in the British population: a case-control study. *Br J Cancer* 2009;100(7):1175-83.
28. Frost G, Harding AH, Darnton A, *et al.* Occupational exposure to asbestos and mortality among asbestos removal workers: a Poisson regression analysis. *Br J Cancer* 2008;99(5):822-9.
29. Tomasallo CD, Christensen KY, Raymond M, *et al.* An Occupational Legacy: Malignant Mesothelioma Incidence and Mortality in Wisconsin. *J Occup Environ Med* 2018;60(12):1143-9.
30. Ringen K, Dement J, Hines S, *et al.* Mortality of older construction and craft workers employed at department of energy nuclear sites: Follow-up through 2016. *Am J Ind Med* 2019;62(9):742-54.
31. Driscoll T, Nelson DI, Steenland K, *et al.* The global burden of disease due to occupational carcinogens. *Am J Ind Med* 2005;48(6):419-31.
32. Jarvholm B. Carcinogens in the construction industry. *Ann N Y Acad Sci* 2006;1076:421-8.
33. Hutchings SJ, Rushton L. Occupational cancer in Britain. Industry sector results. *Br J Cancer* 2012;107 Suppl 1:S92-S103.
34. Marinaccio A, Binazzi A, Di Marzio D, *et al.* Il Registro Nazionale dei Mesoteliomi. Settimo Rapporto. Rome: INAIL, 2021:1-258 (Italian).

- 1  
2 35. Angelini A, Silvestri S. Asbestos Removal Acceleration for New Jobs and Fossil Fuel Use Reduction for Public  
3 Health and Climate Readiness: A Contribution to the Revival of the Italian Economy Post-COVID-19.  
4 *New Solut* 2022;31(4):434-40.  
5  
6  
7 36. Mirabelli D, Kauppinen T. Occupational exposures to carcinogens in Italy: an update of CAREX database. *Int*  
8 *J Occup Environ Health* 2005;11(1):53-63.  
9  
10 37. Scarselli A, Corfiati M, Di Marzio D. Occupational exposure in the removal and disposal of asbestos-  
11 containing materials in Italy. *Int Arch Occup Environ Health* 2016;89(5):857-65.  
12  
13 38. Lacourt A, Leveque E, Guichard E, *et al.* Dose-time-response association between occupational asbestos  
14 exposure and pleural mesothelioma. *Occup Environ Med* 2017;74(9):691-7.  
15  
16 39. Lacourt A, Leveque E, Goldberg M, *et al.* Dose-time response association between occupational asbestos  
17 exposure and pleural mesothelioma: authors' response. *Occup Environ Med* 2018;75(2):161-2.  
18  
19 40. Boffetta P, Pira E, Romano C, *et al.* Response to: 'Dose-time-response association between occupational  
20 asbestos exposure and pleural mesothelioma' by Lacourt *et al.* *Occup Environ Med* 2018;75(2):160.  
21  
22  
23  
24  
25  
26

## 27 **Figure legends**

28  
29  
30  
31 **Figure 1** Diagram showing numbers of male pleural mesothelioma cases and controls across the years  
32 and their main characteristics, Italy, 2000-2018.  
33

## 34 **Figure 1 footnotes**

35 Abbreviations: CARA, Cholangiocarcinoma Aetiology: Role of Asbestos; EAGLE, Environment  
36 And Genetics in Lung cancer Etiology; MISEM, Multicentre Italian Study on the Etiology of  
37 Mesothelioma; ReNaM, Registro Nazionale Mesoteliomi  
38  
39  
40  
41

42  
43 **Figure 2** Pleural mesothelioma odds ratios (OR) and 90% confidence intervals (CI) for selected  
44 occupations in men in the construction industry (ISIC 5000) in four analyses, Italy, 2000–2018. A1:  
45 overall analysis using all Italian cases, 2000-2018; A2: analysis with cases selected from the same periods  
46 of controls; A3: analysis with cases selected from the same areas of controls; A4; analysis with cases  
47 selected from the same periods and areas of controls. In parenthesis the International Standard  
48 Classification of Occupations (ISCO, 1968) codes.  
49  
50  
51  
52

## 53 **Figure 2 footnotes**

54 \*Codes of the International Classification of Diseases for Oncology, Third Edition in parentheses; NOS,  
55 not otherwise specified  
56  
57  
58  
59  
60

| Period    | Year | N. cases | Case source                                                                                       | Control source                                                                                                                              |                                                                                                                 |
|-----------|------|----------|---------------------------------------------------------------------------------------------------|---------------------------------------------------------------------------------------------------------------------------------------------|-----------------------------------------------------------------------------------------------------------------|
| 2000-2018 | 2000 | 682      | NATIONAL<br>MESOTHELIOMA<br>REGISTRY<br>N. 15,592, living in any<br>Region<br>ReNaM questionnaire |                                                                                                                                             |                                                                                                                 |
|           | 2001 | 734      |                                                                                                   |                                                                                                                                             |                                                                                                                 |
|           | 2002 | 760      |                                                                                                   | EAGLE N. 1,617, living in 216 municipalities<br>in five Lombardy Provinces<br>(Milan, Monza, Brescia, Pavia, Varese)<br>EAGLE questionnaire |                                                                                                                 |
|           | 2003 | 758      |                                                                                                   |                                                                                                                                             |                                                                                                                 |
|           | 2004 | 768      |                                                                                                   |                                                                                                                                             |                                                                                                                 |
|           | 2005 | 861      |                                                                                                   |                                                                                                                                             |                                                                                                                 |
|           | 2006 | 782      |                                                                                                   |                                                                                                                                             |                                                                                                                 |
|           | 2007 | 882      |                                                                                                   |                                                                                                                                             |                                                                                                                 |
|           | 2008 | 857      |                                                                                                   |                                                                                                                                             |                                                                                                                 |
|           | 2009 | 901      |                                                                                                   |                                                                                                                                             |                                                                                                                 |
|           | 2010 | 851      |                                                                                                   |                                                                                                                                             |                                                                                                                 |
|           | 2011 | 886      |                                                                                                   |                                                                                                                                             |                                                                                                                 |
|           | 2012 | 886      |                                                                                                   |                                                                                                                                             |                                                                                                                 |
|           | 2013 | 979      |                                                                                                   |                                                                                                                                             | MISEM N. 490, living in five Regions<br>(Apulia, Lombardy, Piedmont,<br>Tuscany, Veneto)<br>ReNaM questionnaire |
|           | 2014 | 928      |                                                                                                   |                                                                                                                                             |                                                                                                                 |
|           | 2015 | 921      |                                                                                                   | CARA N. 103, living in one Region<br>(Emilia-Romagna)<br>ReNaM questionnaire                                                                |                                                                                                                 |
| 2016      | 910  |          |                                                                                                   |                                                                                                                                             |                                                                                                                 |
| 2017      | 841  |          |                                                                                                   |                                                                                                                                             |                                                                                                                 |
| 2018      | 405  |          |                                                                                                   |                                                                                                                                             |                                                                                                                 |

1

210x297mm (200 x 200 DPI)

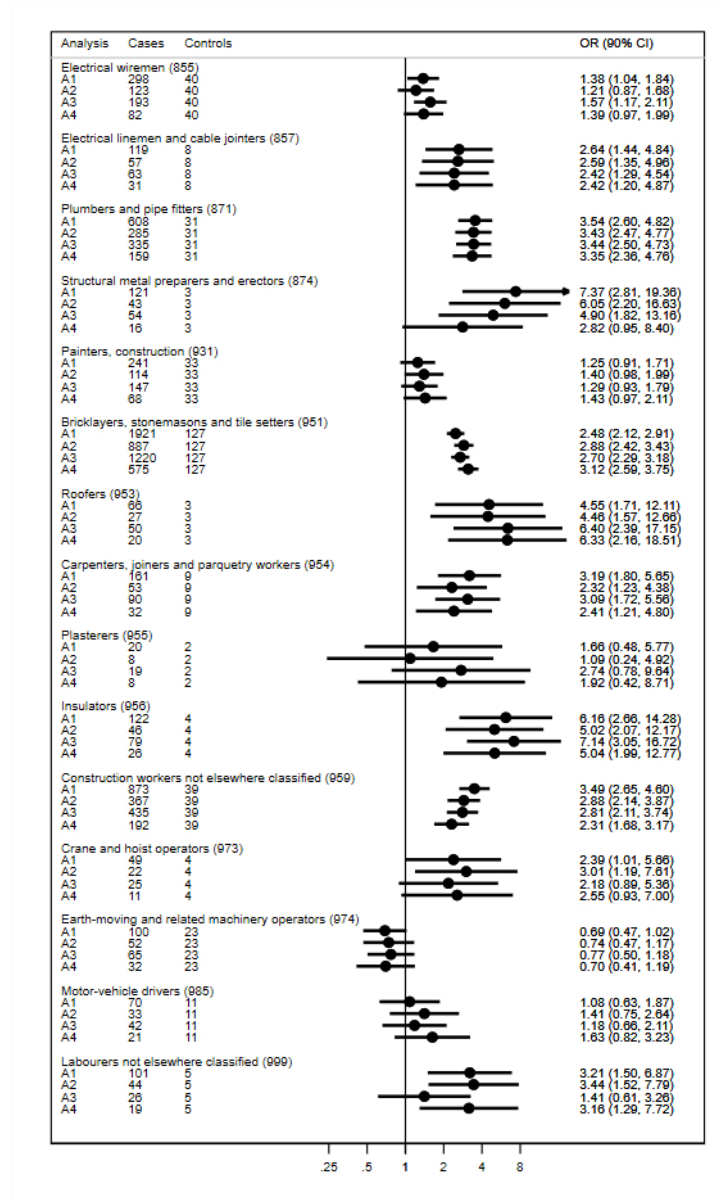

199x329mm (72 x 72 DPI)

**Supplementary Figure 1** Diagram showing numbers of male pleural mesothelioma cases and controls across the years and their main characteristics, Italy, 2002-2004 and 2012-2016. Cases selected from the **same periods** of controls.

| Period                        | Year | N. cases | Case source                                                                                               | Control source                                                                                                                                     |
|-------------------------------|------|----------|-----------------------------------------------------------------------------------------------------------|----------------------------------------------------------------------------------------------------------------------------------------------------|
| 2002-2004<br>and<br>2012-2016 | 2002 | 760      | <b>NATIONAL<br/>MESOTHELIOMA<br/>REGISTRY</b><br>N. 6,910, living in any<br>Region<br>ReNaM questionnaire | <b>EAGLE</b> N. 1,617, living in 216 municipalities<br>in five Lombardy Provinces<br>(Milan, Monza, Brescia, Pavia, Varese)<br>EAGLE questionnaire |
|                               | 2003 | 758      |                                                                                                           |                                                                                                                                                    |
|                               | 2004 | 768      |                                                                                                           |                                                                                                                                                    |
|                               | 2012 | 886      |                                                                                                           |                                                                                                                                                    |
|                               | 2013 | 979      |                                                                                                           | <b>MISEM</b> N. 490, living in five Regions<br>(Apulia, Lombardy, Piedmont,<br>Tuscany, Veneto)<br>ReNaM questionnaire                             |
|                               | 2014 | 928      |                                                                                                           |                                                                                                                                                    |
|                               | 2015 | 921      |                                                                                                           |                                                                                                                                                    |
|                               | 2016 | 910      |                                                                                                           |                                                                                                                                                    |

CARA, Cholangiocarcinoma Aetiology: Role of Asbestos; EAGLE, Environment And Genetics in Lung cancer Etiology; MISEM, Multicentre Italian Study on the Etiology of Mesothelioma; ReNaM, Registro Nazionale Mesoteliomi

**Supplementary Table 1** Pleural mesothelioma odds ratios (OR) and 90% confidence intervals (CI) for selected occupations in men in the construction industry (ISIC 5000), Italy, 2002-2004 and 2012-2016. Cases selected from the **same periods** of controls.

| Occupation (ISCO code)                              | Cases | Controls | OR <sup>a</sup> | 90% CI    |
|-----------------------------------------------------|-------|----------|-----------------|-----------|
| Total                                               | 6,910 | 2,210    |                 |           |
| Never employed in construction                      | 4,808 | 1,808    | 1.00            | Reference |
| Ever employed in construction                       | 2,102 | 402      | 2.03            | 1.82-2.26 |
| White collars                                       | 150   | 64       | 0.96            | 0.73-1.26 |
| Blue collars (55, 56, 581, 628, 631, 7-9)           | 2,001 | 342      | 2.26            | 2.02-2.54 |
| Electrical wiremen (855)                            | 123   | 40       | 1.21            | 0.87-1.68 |
| Electrical linemen and cable jointers (857)         | 57    | 8        | 2.59            | 1.35-4.96 |
| Plumbers and pipe fitters (871)                     | 285   | 31       | 3.43            | 2.47-4.77 |
| Structural metal preparers and erectors (874)       | 43    | 3        | 6.05            | 2.20-16.6 |
| Painters, construction (931)                        | 114   | 33       | 1.40            | 0.98-1.99 |
| Bricklayers, stonemasons and tile setters (951)     | 887   | 127      | 2.88            | 2.42-3.43 |
| Bricklayers (95120)                                 | 813   | 118      | 2.78            | 2.33-3.33 |
| Roofers (953)                                       | 27    | 3        | 4.46            | 1.57-12.6 |
| Carpenters, joiners and parquetry workers (954)     | 53    | 9        | 2.32            | 1.23-4.38 |
| Plasterers (955)                                    | 8     | 2        | 1.09            | 0.24-4.89 |
| Insulators (956)                                    | 46    | 4        | 5.02            | 2.07-12.2 |
| Construction workers not elsewhere classified (959) | 367   | 39       | 2.88            | 2.14-3.86 |
| Crane and hoist operators (973)                     | 22    | 4        | 3.01            | 1.19-7.60 |
| Earth-moving and related machinery operators (974)  | 52    | 23       | 0.74            | 0.47-1.18 |
| Motor-vehicle drivers (985)                         | 33    | 11       | 1.41            | 0.75-2.63 |
| Labourers not elsewhere classified (999)            | 44    | 5        | 3.44            | 1.52-7.80 |

Industry Classification (1971)

<sup>a</sup>OR calculated with unconditional logistic regression models adjusted for age (categorical) and period



**Supplementary Figure 2** Diagram showing numbers of male pleural mesothelioma cases and controls across the years and their main characteristics, Italy, 2000–2018. Cases selected from the **same areas** of controls.

| Period    | Year | N cases | Case source                                                                                                                                                         | Control source                                                                                                                                     |
|-----------|------|---------|---------------------------------------------------------------------------------------------------------------------------------------------------------------------|----------------------------------------------------------------------------------------------------------------------------------------------------|
| 2000-2018 | 2000 | 389     | <b>LOMBARDY<br/>MESOTHELIOMA<br/>REGISTRY</b><br>N. 8,933, living in five<br>Lombardy Provinces<br>(Milan, Monza, Brescia,<br>Pavia, Varese)<br>ReNaM questionnaire |                                                                                                                                                    |
|           | 2001 | 399     |                                                                                                                                                                     |                                                                                                                                                    |
|           | 2002 | 405     |                                                                                                                                                                     |                                                                                                                                                    |
|           | 2003 | 444     |                                                                                                                                                                     | <b>EAGLE</b> N. 1,617, living in 216 municipalities<br>in five Lombardy Provinces<br>(Milan, Monza, Brescia, Pavia, Varese)<br>EAGLE questionnaire |
|           | 2004 | 443     |                                                                                                                                                                     |                                                                                                                                                    |
|           | 2005 | 481     |                                                                                                                                                                     |                                                                                                                                                    |
|           | 2006 | 419     |                                                                                                                                                                     |                                                                                                                                                    |
|           | 2007 | 471     |                                                                                                                                                                     |                                                                                                                                                    |
|           | 2008 | 469     |                                                                                                                                                                     |                                                                                                                                                    |
|           | 2009 | 507     |                                                                                                                                                                     |                                                                                                                                                    |
|           | 2010 | 482     |                                                                                                                                                                     |                                                                                                                                                    |
|           | 2011 | 540     |                                                                                                                                                                     |                                                                                                                                                    |
|           | 2012 | 532     |                                                                                                                                                                     | <b>MISEM</b> N. 490, living in five Regions<br>(Apulia, Lombardy, Piedmont,<br>Tuscany, Veneto)<br>ReNaM questionnaire                             |
|           | 2013 | 604     |                                                                                                                                                                     |                                                                                                                                                    |
|           | 2014 | 505     |                                                                                                                                                                     |                                                                                                                                                    |
|           | 2015 | 526     |                                                                                                                                                                     | <b>CARA</b> N. 103, living in one Region<br>(Emilia-Romagna)<br>ReNaM questionnaire                                                                |
|           | 2016 | 592     |                                                                                                                                                                     |                                                                                                                                                    |
| 2017      | 536  |         |                                                                                                                                                                     |                                                                                                                                                    |
| 2018      | 189  |         |                                                                                                                                                                     |                                                                                                                                                    |

CARA, Cholangiocarcinoma Aetiology: Role of Asbestos; EAGLE, Environment And Genetics in Lung cancer Etiology; MISEM, Multicentre Italian Study on the Etiology of Mesothelioma; ReNaM, Registro Nazionale Mesoteliomi

**Supplementary Table 2** Pleural mesothelioma odds ratios (OR) and 90% confidence intervals (CI) for selected occupations in the construction industry (ISIC 5000), Italy, 2002-2004 and 2012-2016. Cases selected from the **same areas** of controls.

| ISC O, International Standard Classification of Occupations (1968); ISI C, International Standard Classification of Industry Classification (1971) | Occupation (ISCO code)                              | Cases | Controls | OR <sup>a</sup> | 90% CI    |
|----------------------------------------------------------------------------------------------------------------------------------------------------|-----------------------------------------------------|-------|----------|-----------------|-----------|
|                                                                                                                                                    | Total                                               | 8,933 | 2,210    |                 |           |
|                                                                                                                                                    | Never employed in construction                      | 6,175 | 1,808    | 1.00            | Reference |
|                                                                                                                                                    | Ever employed in construction                       | 2,758 | 402      | 2.01            | 1.82-2.22 |
|                                                                                                                                                    | White collars                                       | 177   | 64       | 0.86            | 0.67-1.11 |
|                                                                                                                                                    | Blue collars (55, 56, 581, 628, 631, 7-9)           | 2,625 | 342      | 2.23            | 2.01-2.49 |
|                                                                                                                                                    | Electrical wiremen (855)                            | 193   | 40       | 1.57            | 1.17-2.11 |
|                                                                                                                                                    | Electrical linemen and cable jointers (857)         | 63    | 8        | 2.42            | 1.29-4.54 |
|                                                                                                                                                    | Plumbers and pipe fitters (871)                     | 335   | 31       | 3.44            | 2.50-4.72 |
|                                                                                                                                                    | Structural metal preparers and erectors (874)       | 54    | 3        | 4.90            | 1.82-13.1 |
|                                                                                                                                                    | Painters, construction (931)                        | 147   | 33       | 1.29            | 0.93-1.80 |
|                                                                                                                                                    | Bricklayers, stonemasons and tile setters (951)     | 1,220 | 127      | 2.70            | 2.29-3.18 |
|                                                                                                                                                    | Bricklayers (95120)                                 | 1,161 | 118      | 2.75            | 2.32-3.26 |
|                                                                                                                                                    | Roofers (953)                                       | 50    | 3        | 6.40            | 2.39-17.2 |
|                                                                                                                                                    | Carpenters, joiners and parquetry workers (954)     | 90    | 9        | 3.09            | 1.72-5.57 |
|                                                                                                                                                    | Plasterers (955)                                    | 19    | 2        | 2.74            | 0.78-9.65 |
|                                                                                                                                                    | Insulators (956)                                    | 79    | 4        | 7.14            | 3.05-16.7 |
|                                                                                                                                                    | Construction workers not elsewhere classified (959) | 435   | 39       | 2.81            | 2.11-3.73 |
|                                                                                                                                                    | Crane and hoist operators (973)                     | 25    | 4        | 2.18            | 0.89-5.38 |
|                                                                                                                                                    | Earth-moving and related machinery operators (974)  | 65    | 23       | 0.77            | 0.50-1.17 |
|                                                                                                                                                    | Motor-vehicle drivers (985)                         | 42    | 11       | 1.18            | 0.66-2.11 |
|                                                                                                                                                    | Labourers not elsewhere classified (999)            | 26    | 5        | 1.41            | 0.61-3.26 |

Industry Classification (1971)

<sup>a</sup>OR calculated with unconditional logistic regression models adjusted for age (categorical) and period

**Supplementary Figure 3** Diagram showing numbers of male pleural mesothelioma cases and controls across the years and their main characteristics, Italy, 2002-2004 and 2012-2016. Cases selected from the **same periods and areas** of controls.

| Period                        | Year | N. cases | Case source                                                                                                                                                                        | Control source                                                                                                                                     |
|-------------------------------|------|----------|------------------------------------------------------------------------------------------------------------------------------------------------------------------------------------|----------------------------------------------------------------------------------------------------------------------------------------------------|
| 2002-2004<br>and<br>2012-2016 | 2002 | 405      | <b>NATIONAL<br/>MESOTHELIOMA<br/>REGISTRY</b><br>N. 4,051, living in six<br>Regions (Lombardy,<br>Piedmont, Veneto,<br>Tuscany, Apulia, Emilia-<br>Romagna)<br>ReNaM questionnaire | <b>EAGLE</b> N. 1,617, living in 216 municipalities<br>in five Lombardy Provinces<br>(Milan, Monza, Brescia, Pavia, Varese)<br>EAGLE questionnaire |
|                               | 2003 | 444      |                                                                                                                                                                                    |                                                                                                                                                    |
|                               | 2004 | 443      |                                                                                                                                                                                    |                                                                                                                                                    |
|                               | 2012 | 532      |                                                                                                                                                                                    |                                                                                                                                                    |
|                               | 2013 | 605      |                                                                                                                                                                                    | <b>MISEM</b> N. 490, living in five Regions<br>(Apulia, Lombardy, Piedmont,<br>Tuscany, Veneto)<br>ReNaM questionnaire                             |
|                               | 2014 | 505      |                                                                                                                                                                                    |                                                                                                                                                    |
|                               | 2015 | 526      |                                                                                                                                                                                    |                                                                                                                                                    |
|                               | 2016 | 592      |                                                                                                                                                                                    |                                                                                                                                                    |

CARA, Cholangiocarcinoma Aetiology: Role of Asbestos; EAGLE, Environment And Genetics in Lung cancer Etiology; MISEM, Multicentre Italian Study on the Etiology of Mesothelioma; ReNaM, Registro Nazionale Mesoteliomi

**Supplementary Table 3** Pleural mesothelioma odds ratios (OR) and 90% confidence intervals (CI) for selected occupations in men in the construction sector (ISIC 5000), Italy, 2000–2018. Cases selected from the **same periods and areas** of controls.

| Occupation (ISCO code)                              | Cases | Controls | OR <sup>a</sup> | 90% CI     |
|-----------------------------------------------------|-------|----------|-----------------|------------|
| Total                                               | 4,051 | 2,210    |                 |            |
| Never employed in construction                      | 2,790 | 1,808    | 1.00            | Reference  |
| Ever employed in construction                       | 1,261 | 402      | 2.05            | 1.82-2.31  |
| White collars                                       | 89    | 64       | 0.97            | 0.71-1.31  |
| Blue collars (55, 56, 581, 628, 631, 7-9)           | 1,200 | 342      | 2.29            | 2.02-2.59  |
| Electrical wiremen (855)                            | 82    | 40       | 1.39            | 0.97-1.98  |
| Electrical linemen and cable jointers (857)         | 31    | 8        | 2.42            | 1.20-4.86  |
| Plumbers and pipe fitters (871)                     | 159   | 31       | 3.35            | 2.36-4.76  |
| Structural metal preparers and erectors (874)       | 16    | 3        | 2.82            | 0.95-8.43  |
| Painters, construction (931)                        | 68    | 33       | 1.43            | 0.97-2.12  |
| Bricklayers, stonemasons and tile setters (951)     | 575   | 127      | 3.12            | 2.59-3.75  |
| Bricklayers (95120)                                 | 547   | 118      | 3.22            | 2.66-3.89  |
| Roofers (953)                                       | 20    | 3        | 6.33            | 2.16-18.48 |
| Carpenters, joiners and parquetry workers (954)     | 32    | 9        | 2.41            | 1.21-4.80  |
| Plasterers (955)                                    | 8     | 2        | 1.92            | 0.42-8.65  |
| Insulators (956)                                    | 26    | 4        | 5.04            | 1.99-12.77 |
| Construction workers not elsewhere classified (959) | 192   | 39       | 2.31            | 1.68-3.16  |
| Crane and hoist operators (973)                     | 11    | 4        | 2.55            | 0.93-7.01  |
| Earth-moving and related machinery operators (974)  | 32    | 23       | 0.70            | 0.41-1.18  |
| Motor-vehicle drivers (985)                         | 21    | 11       | 1.63            | 0.82-3.22  |
| Labourers not elsewhere classified (999)            | 19    | 5        | 3.16            | 1.29-7.70  |

Industry Classification (1971)

<sup>a</sup>OR calculated with unconditional logistic regression models adjusted for age (categorical) and period

STROBE Statement—Checklist of items that should be included in reports of *case-control studies*

|                              | Item No | Recommendation                                                                                                                                                                                    | Comment                                |
|------------------------------|---------|---------------------------------------------------------------------------------------------------------------------------------------------------------------------------------------------------|----------------------------------------|
| <b>Title and abstract</b>    | 1       | (a) Indicate the study's design with a commonly used term in the title or the abstract                                                                                                            | Done                                   |
|                              |         | (b) Provide in the abstract an informative and balanced summary of what was done and what was found                                                                                               | Done                                   |
| <b>Introduction</b>          |         |                                                                                                                                                                                                   |                                        |
| Background/rationale         | 2       | Explain the scientific background and rationale for the investigation being reported                                                                                                              | Done                                   |
| Objectives                   | 3       | State specific objectives, including any prespecified hypotheses                                                                                                                                  | Done                                   |
| <b>Methods</b>               |         |                                                                                                                                                                                                   |                                        |
| Study design                 | 4       | Present key elements of study design early in the paper                                                                                                                                           | Done                                   |
| Setting                      | 5       | Describe the setting, locations, and relevant dates, including periods of recruitment, exposure, follow-up, and data collection                                                                   | Done                                   |
| Participants                 | 6       | (a) Give the eligibility criteria, and the sources and methods of case ascertainment and control selection. Give the rationale for the choice of cases and controls                               | Done                                   |
|                              |         | (b) For matched studies, give matching criteria and the number of controls per case                                                                                                               | Not applicable                         |
| Variables                    | 7       | Clearly define all outcomes, exposures, predictors, potential confounders, and effect modifiers. Give diagnostic criteria, if applicable                                                          | Done                                   |
| Data sources/<br>measurement | 8*      | For each variable of interest, give sources of data and details of methods of assessment (measurement). Describe comparability of assessment methods if there is more than one group              | Done                                   |
| Bias                         | 9       | Describe any efforts to address potential sources of bias                                                                                                                                         | Done                                   |
| Study size                   | 10      | Explain how the study size was arrived at                                                                                                                                                         | Done                                   |
| Quantitative variables       | 11      | Explain how quantitative variables were handled in the analyses. If applicable, describe which groupings were chosen and why                                                                      | Done                                   |
| Statistical methods          | 12      | (a) Describe all statistical methods, including those used to control for confounding                                                                                                             | Done                                   |
|                              |         | (b) Describe any methods used to examine subgroups and interactions                                                                                                                               | Done                                   |
|                              |         | (c) Explain how missing data were addressed                                                                                                                                                       | Done                                   |
|                              |         | (d) If applicable, explain how matching of cases and controls was addressed                                                                                                                       | Done                                   |
|                              |         | (e) Describe any sensitivity analyses                                                                                                                                                             | Done (three sensitivity analyses)      |
| <b>Results</b>               |         |                                                                                                                                                                                                   |                                        |
| Participants                 | 13*     | (a) Report numbers of individuals at each stage of study—eg numbers potentially eligible, examined for eligibility, confirmed eligible, included in the study, completing follow-up, and analysed | Done                                   |
|                              |         | (b) Give reasons for non-participation at each stage                                                                                                                                              | Participation had been reported in the |

|                          |     |                                                                                                                                                                                                              |                                                                        |
|--------------------------|-----|--------------------------------------------------------------------------------------------------------------------------------------------------------------------------------------------------------------|------------------------------------------------------------------------|
|                          |     |                                                                                                                                                                                                              | original studies)                                                      |
|                          |     | (c) Consider use of a flow diagram                                                                                                                                                                           | Diagram provided                                                       |
| Descriptive data         | 14* | (a) Give characteristics of study participants (eg demographic, clinical, social) and information on exposures and potential confounders                                                                     | Done                                                                   |
|                          |     | (b) Indicate number of participants with missing data for each variable of interest                                                                                                                          | Done                                                                   |
| Outcome data             | 15* | Report numbers in each exposure category, or summary measures of exposure                                                                                                                                    | Done                                                                   |
| Main results             | 16  | (a) Give unadjusted estimates and, if applicable, confounder-adjusted estimates and their precision (eg, 95% confidence interval). Make clear which confounders were adjusted for and why they were included | Since previous studies were matched, crude analysis is not appropriate |
|                          |     | (b) Report category boundaries when continuous variables were categorized                                                                                                                                    | Done                                                                   |
|                          |     | (c) If relevant, consider translating estimates of relative risk into absolute risk for a meaningful time period                                                                                             | Not applicable                                                         |
| Other analyses           | 17  | Report other analyses done—eg analyses of subgroups and interactions, and sensitivity analyses                                                                                                               | Done                                                                   |
| <b>Discussion</b>        |     |                                                                                                                                                                                                              |                                                                        |
| Key results              | 18  | Summarise key results with reference to study objectives                                                                                                                                                     | Done                                                                   |
| Limitations              | 19  | Discuss limitations of the study, taking into account sources of potential bias or imprecision. Discuss both direction and magnitude of any potential bias                                                   | Done                                                                   |
| Interpretation           | 20  | Give a cautious overall interpretation of results considering objectives, limitations, multiplicity of analyses, results from similar studies, and other relevant evidence                                   | Done                                                                   |
| Generalisability         | 21  | Discuss the generalisability (external validity) of the study results                                                                                                                                        | Not applicable                                                         |
| <b>Other information</b> |     |                                                                                                                                                                                                              |                                                                        |
| Funding                  | 22  | Give the source of funding and the role of the funders for the present study and, if applicable, for the original study on which the present article is based                                                | Done                                                                   |

\*Give information separately for cases and controls.

**Note:** An Explanation and Elaboration article discusses each checklist item and gives methodological background and published examples of transparent reporting. The STROBE checklist is best used in conjunction with this article (freely available on the Web sites of PLoS Medicine at <http://www.plosmedicine.org/>, Annals of Internal Medicine at <http://www.annals.org/>, and Epidemiology at <http://www.epidem.com/>). Information on the STROBE Initiative is available at <http://www.strobe-statement.org>.

# BMJ Open

## Pleural mesothelioma risk in the construction industry: a case-control study in Italy. 2000-2018

|                               |                                                                                                                                                                                                                                                                                                                                                                                                                                                                                                                                                                                                                                                                                                                                                                                                                                                                                                                                                                                                                                                                                                                                                                                                                                                                                                                                                                                                                                                                                                                                                                                                                                                                                                                                                                                                                                                                                                                                                                                                                                                                                                                                                                                                                                                 |
|-------------------------------|-------------------------------------------------------------------------------------------------------------------------------------------------------------------------------------------------------------------------------------------------------------------------------------------------------------------------------------------------------------------------------------------------------------------------------------------------------------------------------------------------------------------------------------------------------------------------------------------------------------------------------------------------------------------------------------------------------------------------------------------------------------------------------------------------------------------------------------------------------------------------------------------------------------------------------------------------------------------------------------------------------------------------------------------------------------------------------------------------------------------------------------------------------------------------------------------------------------------------------------------------------------------------------------------------------------------------------------------------------------------------------------------------------------------------------------------------------------------------------------------------------------------------------------------------------------------------------------------------------------------------------------------------------------------------------------------------------------------------------------------------------------------------------------------------------------------------------------------------------------------------------------------------------------------------------------------------------------------------------------------------------------------------------------------------------------------------------------------------------------------------------------------------------------------------------------------------------------------------------------------------|
| Journal:                      | <i>BMJ Open</i>                                                                                                                                                                                                                                                                                                                                                                                                                                                                                                                                                                                                                                                                                                                                                                                                                                                                                                                                                                                                                                                                                                                                                                                                                                                                                                                                                                                                                                                                                                                                                                                                                                                                                                                                                                                                                                                                                                                                                                                                                                                                                                                                                                                                                                 |
| Manuscript ID                 | bmjopen-2023-073480.R1                                                                                                                                                                                                                                                                                                                                                                                                                                                                                                                                                                                                                                                                                                                                                                                                                                                                                                                                                                                                                                                                                                                                                                                                                                                                                                                                                                                                                                                                                                                                                                                                                                                                                                                                                                                                                                                                                                                                                                                                                                                                                                                                                                                                                          |
| Article Type:                 | Original research                                                                                                                                                                                                                                                                                                                                                                                                                                                                                                                                                                                                                                                                                                                                                                                                                                                                                                                                                                                                                                                                                                                                                                                                                                                                                                                                                                                                                                                                                                                                                                                                                                                                                                                                                                                                                                                                                                                                                                                                                                                                                                                                                                                                                               |
| Date Submitted by the Author: | 16-Jun-2023                                                                                                                                                                                                                                                                                                                                                                                                                                                                                                                                                                                                                                                                                                                                                                                                                                                                                                                                                                                                                                                                                                                                                                                                                                                                                                                                                                                                                                                                                                                                                                                                                                                                                                                                                                                                                                                                                                                                                                                                                                                                                                                                                                                                                                     |
| Complete List of Authors:     | <p>Stella, Simona; Fondazione IRCCS Ca' Granda Ospedale Maggiore Policlinico, Occupational Health Unit, Regional Operating Center of Lombardy (COR Lombardia)</p> <p>Consonni, Dario; Fondazione IRCCS Ca' Granda Ospedale Maggiore Policlinico, Occupational Health Unit, Regional Operating Center of Lombardy (COR Lombardia)</p> <p>Migliore, Enrica; University of Turin, COR Piemonte, Cancer Epidemiology Unit</p> <p>Stura, Antonella; CPO and University of Turin, COR Piemonte, Cancer Epidemiology Unit</p> <p>Cavone, Domenica; University of Bari Aldo Moro, COR Puglia, Section of Occupational Medicine "B. Ramazzini", Department of Interdisciplinary Medicine</p> <p>Vimercati, Luigi; University of Bari Aldo Moro, COR Puglia, Section of Occupational Medicine "B. Ramazzini", Department of Interdisciplinary Medicine</p> <p>Miligi, Lucia; Institute for Cancer Research, Prevention and Clinical Network, COR Toscana, Unit of Environmental and Occupational Epidemiology</p> <p>Piro, Sara; Institute for Cancer Research, Prevention and Clinical Network, COR Toscana, Unit of Environmental and Occupational Epidemiology</p> <p>Landi, Maria Teresa; National Cancer Institute, Division of Cancer Epidemiology and Genetics</p> <p>Caporaso, Neil E. ; National Cancer Institute, Division of Cancer Epidemiology and Genetics</p> <p>Curti, Stefania; University of Bologna, Department of Medical and Surgical Sciences</p> <p>mattioli, stefano; University of Ferrara, Department of Environmental and Prevention Sciences</p> <p>Brandi, Giovanni; University of Bologna, Department of Medical and Surgical Sciences; IRCCS Azienda Ospedaliero-Universitaria di Bologna, Oncology Unit</p> <p>Gioscia, Carmela; Valle d'Aosta Health Local Unit, COR Valle d'Aosta</p> <p>Eccher, Silvia; Provincial Unit of Health, Hygiene and Occupational Medicine, COR Province of Trento</p> <p>Murano, Stefano; Alto Adige Health Local Unit, COR Province of Bolzano</p> <p>Casotto, Veronica; Azienda Zero, COR Veneto, Epidemiological Department</p> <p>Comiati, Vera; Azienda Zero, COR Veneto, Epidemiological Department</p> <p>Negro, Corrado; University of Trieste - Trieste General Hospitals, COR</p> |

|                                    |                                                                                                                                                                                                                                                                                                                                                                                                                                                                                                                                                                                                                                                                                                                                                                                                                                                                                                                                                                                                                                                                                                                                                                                                                                                                                                                                                                                                                                                                                                                                                                                                                                                                                                                                                                                                                                                                                                                                                                                                                                                                          |
|------------------------------------|--------------------------------------------------------------------------------------------------------------------------------------------------------------------------------------------------------------------------------------------------------------------------------------------------------------------------------------------------------------------------------------------------------------------------------------------------------------------------------------------------------------------------------------------------------------------------------------------------------------------------------------------------------------------------------------------------------------------------------------------------------------------------------------------------------------------------------------------------------------------------------------------------------------------------------------------------------------------------------------------------------------------------------------------------------------------------------------------------------------------------------------------------------------------------------------------------------------------------------------------------------------------------------------------------------------------------------------------------------------------------------------------------------------------------------------------------------------------------------------------------------------------------------------------------------------------------------------------------------------------------------------------------------------------------------------------------------------------------------------------------------------------------------------------------------------------------------------------------------------------------------------------------------------------------------------------------------------------------------------------------------------------------------------------------------------------------|
|                                    | <p>Friuli-Venezia Giulia, Clinical Unit of Occupational Medicine<br/> D'Agostin, Flavia; University of Trieste - Trieste General Hospitals, COR<br/> Friuli-Venezia Giulia, Clinical Unit of Occupational Medicine<br/> Genova, Carlo; IRCCS Ospedale Policlinico San Martino, UO Clinica di<br/> Oncologia Medica; Università degli Studi di Genova, Dipartimento di<br/> Medicina Interna e Specialità Mediche<br/> Benfatto, Lucia; IRCCS Ospedale Policlinico San Martino, COR Liguria, UO<br/> Epidemiologia Clinica<br/> Romanelli, Antonio; Health Local Unit, COR Emilia-Romagna, Public<br/> Health Department<br/> Grappasonni, Iolanda; University of Camerino, COR Marche, School of<br/> Medicinal and Health Products Sciences<br/> Madeo, Gabriella; Regione Umbria, COR Umbria, Servizio Prevenzione,<br/> Sanità Veterinaria e Sicurezza Alimentare<br/> Cozzi, Iliara; Lazio Regional Health Service, ASL Roma 1, COR Lazio,<br/> Department of Epidemiology<br/> Romeo, Elisa; Lazio Regional Health Service, ASL Roma 1, COR Lazio,<br/> Department of Epidemiology<br/> Tommaso, Staniscia ; Abruzzo Regional Health Agency (ASR), COR<br/> Abruzzo<br/> Carrozza, Francesco; Registri Tumori Regione Molise, COR Molise<br/> Labianca, Michele; Epidemiologic Regional Center, COR Basilicata<br/> Tallarigo, Federico; Public Health Unit, COR Calabria<br/> Cascone, Giuseppe; Cancer Registry ASP Ragusa and Sicily Regional<br/> Epidemiological Observatory, COR Sicilia<br/> Melis, Massimo; Regional Epidemiological Center, COR Sardegna<br/> Marinaccio, Alessandro; Italian Workers' Compensation Authority<br/> (INAIL), Occupational and Environmental Medicine, Epidemiology and<br/> Hygiene Department<br/> Binazzi, Alessandra; Italian Workers' Compensation Authority (INAIL),<br/> Occupational and Environmental Medicine, Epidemiology and Hygiene<br/> Department<br/> Mensi, Carolina; Fondazione IRCCS Ca' Granda Ospedale Maggiore<br/> Policlinico, Epidemiology Unit<br/> ReNaM, Working Group; ReNaM Working Group</p> |
| <b>Primary Subject<br>Heading</b>: | Occupational and environmental medicine                                                                                                                                                                                                                                                                                                                                                                                                                                                                                                                                                                                                                                                                                                                                                                                                                                                                                                                                                                                                                                                                                                                                                                                                                                                                                                                                                                                                                                                                                                                                                                                                                                                                                                                                                                                                                                                                                                                                                                                                                                  |
| Secondary Subject Heading:         | Epidemiology                                                                                                                                                                                                                                                                                                                                                                                                                                                                                                                                                                                                                                                                                                                                                                                                                                                                                                                                                                                                                                                                                                                                                                                                                                                                                                                                                                                                                                                                                                                                                                                                                                                                                                                                                                                                                                                                                                                                                                                                                                                             |
| Keywords:                          | Case-Control Studies, EPIDEMIOLOGY, OCCUPATIONAL & INDUSTRIAL<br>MEDICINE, Respiratory tract tumours < ONCOLOGY, PUBLIC HEALTH                                                                                                                                                                                                                                                                                                                                                                                                                                                                                                                                                                                                                                                                                                                                                                                                                                                                                                                                                                                                                                                                                                                                                                                                                                                                                                                                                                                                                                                                                                                                                                                                                                                                                                                                                                                                                                                                                                                                           |
|                                    |                                                                                                                                                                                                                                                                                                                                                                                                                                                                                                                                                                                                                                                                                                                                                                                                                                                                                                                                                                                                                                                                                                                                                                                                                                                                                                                                                                                                                                                                                                                                                                                                                                                                                                                                                                                                                                                                                                                                                                                                                                                                          |

SCHOLARONE™  
Manuscripts

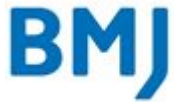

I, the Submitting Author has the right to grant and does grant on behalf of all authors of the Work (as defined in the below author licence), an exclusive licence and/or a non-exclusive licence for contributions from authors who are: i) UK Crown employees; ii) where BMJ has agreed a CC-BY licence shall apply, and/or iii) in accordance with the terms applicable for US Federal Government officers or employees acting as part of their official duties; on a worldwide, perpetual, irrevocable, royalty-free basis to BMJ Publishing Group Ltd ("BMJ") its licensees and where the relevant Journal is co-owned by BMJ to the co-owners of the Journal, to publish the Work in this journal and any other BMJ products and to exploit all rights, as set out in our [licence](#).

The Submitting Author accepts and understands that any supply made under these terms is made by BMJ to the Submitting Author unless you are acting as an employee on behalf of your employer or a postgraduate student of an affiliated institution which is paying any applicable article publishing charge ("APC") for Open Access articles. Where the Submitting Author wishes to make the Work available on an Open Access basis (and intends to pay the relevant APC), the terms of reuse of such Open Access shall be governed by a Creative Commons licence – details of these licences and which [Creative Commons](#) licence will apply to this Work are set out in our licence referred to above.

Other than as permitted in any relevant BMJ Author's Self Archiving Policies, I confirm this Work has not been accepted for publication elsewhere, is not being considered for publication elsewhere and does not duplicate material already published. I confirm all authors consent to publication of this Work and authorise the granting of this licence.



**Pleural mesothelioma risk in the construction industry: a case-control study in Italy, 2000-2018**

1  
2  
3  
4 Simona Stella,<sup>1\*</sup> Dario Consonni,<sup>1\*</sup> Enrica Migliore,<sup>2</sup> Antonella Stura,<sup>2</sup> Domenica Cavone,<sup>3</sup> Luigi  
5 Vimercati,<sup>3</sup> Lucia Miligi,<sup>4</sup> Sara Piro,<sup>4</sup> Maria Teresa Landi,<sup>5</sup> Neil E Caporaso,<sup>5</sup> Stefania Curti,<sup>6</sup> Stefano  
6 Mattioli,<sup>7</sup> Giovanni Brandi,<sup>6,8</sup> Carmela Gioscia,<sup>9</sup> Silvia Eccher,<sup>10</sup> Stefano Murano,<sup>11</sup> Veronica Casotto,<sup>12</sup>  
7 Vera Comiati,<sup>12</sup> Corrado Negro,<sup>13</sup> Flavia D'Agostin,<sup>13</sup> Carlo Genova,<sup>14,15</sup> Lucia Benfatto,<sup>16</sup> Antonio  
8 Romanelli,<sup>17</sup> Iolanda Grappasonni,<sup>18</sup> Gabriella Madeo,<sup>19</sup> Iaria Cozzi,<sup>20</sup> Elisa Romeo,<sup>20</sup> Tommaso  
9 Staniscia,<sup>21</sup> Francesco Carrozza,<sup>22</sup> Michele Labianca,<sup>23</sup> Federico Tallarigo,<sup>24</sup> Giuseppe Cascone,<sup>25</sup> Massimo  
10 Melis,<sup>26</sup> Alessandro Marinaccio,<sup>27</sup> Alessandra Binazzi,<sup>27</sup> Carolina Mensi,<sup>1</sup> RenaM Working Group\*\*

11  
12  
13  
14  
15  
16  
17 \*Contributed equally to this work

18  
19 <sup>1</sup>Occupational Health Unit, Regional Operating Center of Lombardy (COR Lombardia), Fondazione IRCCS  
20 Ca' Granda Ospedale Maggiore Policlinico, Milan, Italy

21  
22 <sup>2</sup>COR Piemonte, Cancer Epidemiology Unit, CPO and University of Turin, Italy

23  
24 <sup>3</sup>COR Puglia, Section of Occupational Medicine "B. Ramazzini", Department of Interdisciplinary Medicine,  
25 University of Bari Aldo Moro, Bari, Italy

26  
27 <sup>4</sup>COR Toscana, Institute for Cancer Research, Prevention and Clinical Network, Unit of Environmental and  
28 Occupational Epidemiology, Firenze, Italy

29  
30 <sup>5</sup>Division of Cancer Epidemiology and Genetics, National Cancer Institute, Bethesda, MD, USA

31  
32 <sup>6</sup>Department of Medical and Surgical Sciences, University of Bologna, Italy

33  
34 <sup>7</sup>Department of Environmental and Prevention Sciences, University of Ferrara, Italy

35  
36 <sup>8</sup>Oncology Unit, IRCCS Azienda Ospedaliero-Universitaria di Bologna, Italy

37  
38 <sup>9</sup>COR Valle d'Aosta, Valle d'Aosta Health Local Unit, Aosta, Italy

39  
40 <sup>10</sup>COR Province of Trento, Provincial Unit of Health, Hygiene and Occupational Medicine, Trento, Italy

41  
42 <sup>11</sup>COR Province of Bolzano, Alto Adige Health Local Unit, Bolzano, Italy

43  
44 <sup>12</sup>COR Veneto, Epidemiological Department, Azienda Zero, Veneto Region, Italy

45  
46 <sup>13</sup>COR Friuli-Venezia Giulia, University of Trieste - Trieste General Hospitals, Clinical Unit of  
47 Occupational Medicine, Trieste, Italy

48  
49 <sup>14</sup>UO Clinica di Oncologia Medica, IRCCS Ospedale Policlinico San Martino, Genova, Italy

50  
51 <sup>15</sup>Dipartimento di Medicina Interna e Specialità Mediche, Università degli Studi di Genova. Italy

52  
53 <sup>16</sup>COR Liguria, UO Epidemiologia Clinica, IRCCS Ospedale Policlinico San Martino, Genova, Italy

54  
55 <sup>17</sup>COR Emilia-Romagna, Health Local Unit, Public Health Department, Reggio Emilia, Italy

56  
57 <sup>18</sup>COR Marche, University of Camerino, School of Medicinal and Health Products Sciences, Camerino, Italy

58  
59 <sup>19</sup>COR Umbria, Servizio Prevenzione, Sanità Veterinaria e Sicurezza Alimentare - Regione Umbria,  
60 Perugia, Italy

<sup>20</sup>COR Lazio, Department of Epidemiology, Lazio Regional Health Service, ASL Roma 1, Rome, Italy

1 <sup>21</sup>COR Abruzzo, Abruzzo Regional Health Agency (ASR), Pescara, Italy

2 <sup>22</sup>COR Molise, Registri Tumori Regione Molise, Campobasso, Italy

3 <sup>23</sup>COR Basilicata, Epidemiologic Regional Center, Potenza, Italy

4 <sup>24</sup>COR Calabria, Public Health Unit, Crotona, Italy

5 <sup>25</sup>COR Sicilia, Cancer Registry ASP Ragusa and Sicily Regional Epidemiological Observatory, Italy

6 <sup>26</sup>COR Sardegna. Regional Epidemiological Center, Cagliari, Italy

7 <sup>27</sup>Occupational and Environmental Medicine, Epidemiology and Hygiene Department, Italian Workers'  
8 Compensation Authority (INAIL), Rome, Italy

9  
10  
11  
12  
13  
14  
15  
16 **\*\*ReNaM Working Group members:**

17 Di Marzio D<sup>27</sup> (ReNaM);

18 Richiardi L,<sup>2</sup> Gangemi M,<sup>2</sup> Brentisci C,<sup>2</sup> Gilardetti M,<sup>2</sup> Mirabelli D<sup>2</sup> (COR Piemonte);

19 Bonzini M,<sup>1</sup> Dallari B,<sup>1</sup> Pesatori AC,<sup>1</sup> Rugarli S<sup>1</sup> (COR Lombardia);

20 Fedeli U<sup>12</sup> (COR Veneto);

21 De Michieli P<sup>13</sup> (COR Friuli-Venezia Giulia);

22 Mangone L,<sup>17</sup> Storchi C,<sup>17</sup> Sala O<sup>17</sup> (COR Emilia-Romagna);

23 Cacciarini V,<sup>4</sup> Giovannetti L,<sup>4</sup> Martini A,<sup>4</sup> Elisabetta Chellini<sup>4</sup> (COR Toscana);

24 Pascucci C<sup>18</sup> (COR Marche);

25 Michelozzi P,<sup>20</sup> Davoli M,<sup>20</sup> Ancona L<sup>20</sup>, Balestri A<sup>20</sup> (COR Lazio);

26 Serio G,<sup>3</sup> De Maria L,<sup>3</sup> Caputi A,<sup>3</sup> Delfino MC,<sup>3</sup> Pentimone F<sup>3</sup> (COR Puglia);

27 Lio SG<sup>24</sup> (COR Calabria);

28 Frasca G,<sup>25</sup> Giurdanella MC,<sup>25</sup> Martorana C,<sup>25</sup> Rollo P,<sup>25</sup> Spata E,<sup>25</sup> Dardanoni G,<sup>25</sup> Scondotto S<sup>25</sup> (COR  
29 Sicilia);

30 Nieddu V,<sup>26</sup> Pergola M,<sup>26</sup> Stecchi S<sup>26</sup> (COR Sardegna).

31  
32  
33  
34  
35  
36  
37  
38  
39  
40  
41  
42  
43 **Correspondence to**

44 Dr Dario Consonni, Epidemiology Unit, Fondazione IRCCS Ca' Granda Ospedale Maggiore Policlinico,  
45 Milan, Italy; [dario.consonni@unimi.it](mailto:dario.consonni@unimi.it); [dario.consonni@policlinico.mi.it](mailto:dario.consonni@policlinico.mi.it)

46  
47  
48  
49  
50 **Key words:** case-control study, asbestos, pleural cancer; mesothelioma, construction industry, occupations

51  
52  
53 **Word counts:** abstract 288; text: 3958

## ABSTRACT

**Objectives** Workers in the construction industry have been exposed to asbestos in various occupations. In Italy, a national mesothelioma registry has been implemented more than 20 years ago. Using cases selected from this registry and exploiting existing control datasets, we estimated relative risks for pleural mesothelioma (PM) among construction workers.

**Design** Case-control study.

**Setting** Cases from the national mesothelioma registry (2000-2018), controls from three previous case-control studies.

**Methods** We selected male PM incident cases diagnosed in 2000-2018. Population controls were taken from three studies performed in six Italian regions within two periods (2002-2004 and 2012-2016). Age- and period-adjusted unconditional logistic regression models were fitted to estimate odds ratios (ORs) for occupations in the construction industry. We followed two approaches, one (primary) excluding and the other (secondary) including subjects employed in other non-construction blue collar occupations for >5 years. For both approaches, we performed an overall analysis including all cases and, given the incomplete temporal and geographic overlap of cases and controls, three time or/and space restricted sensitivity analyses.

**Results** The whole dataset included 15 592 cases and 2210 controls. With the primary approach (4797 cases, 1085 controls), OR was 3.64 (2181 cases) for subjects ever employed in construction. We found elevated risks for blue collar occupations (1993 cases, OR 4.52), including bricklayers (988 cases, OR 7.05), general construction workers (320 cases, OR 4.66), plumbers and pipe fitters (305 cases, OR 9.13), painters (104 cases, OR 2.17), and several others. Sensitivity analyses yielded very similar findings. Using the secondary approach we observed similar patterns, but ORs were remarkably lower.

**Conclusions** We found markedly increased pleural mesothelioma risks for most occupations in the construction industry. These findings are relevant for compensation of subjects affected with mesothelioma in the construction industry.

### Strength and limitations of this study

- The current study benefited from the use of high quality data covering the period from 2000 to 2018 from the National Mesothelioma Registry (ReNaM), an epidemiological surveillance program organized as a network of regional operating centers which perform active search of mesothelioma cases
- Using a control-initiated case-control approach, we exploited three existing control datasets, mostly population-based, covering different periods and regions
- To minimize confounding, in a primary approach we excluded subjects ever employed in non-construction blue collar occupations for 5 years or more

- The main limitation was the incomplete spatial and temporal overlap between pleural mesothelioma cases and controls
- However, various sensitivity analyses with temporal or/and spatial restrictions confirmed the validity of using all cases occurred in the whole period in the whole Italian territory

For peer review only

## INTRODUCTION

Asbestos is the generic commercial designation for a group of naturally occurring mineral silicate fibers of the serpentine and amphibole series. These include the serpentine mineral chrysotile (“white asbestos”), and the five amphibole minerals actinolite, amosite (“brown asbestos”), anthophyllite, crocidolite (“blue asbestos”), and tremolite. All forms of asbestos are carcinogenic, causing mesothelioma (any site) and cancer of the lung, larynx, and ovary.<sup>1</sup> Malignant mesothelioma (MM) is a rare and aggressive neoplasm arising from pleura (>90%), peritoneum (<10%), pericardium (<1%), and tunica vaginalis testis (<1%). Notwithstanding the asbestos ban in about 70 countries, due to the long latency between exposure and MM occurrence, the number of MM deaths caused by asbestos in recent years is in the order of 25-38 thousands per year.<sup>2-4</sup>

Italy produced and consumed large quantities of asbestos until the ban in 1992. For this reason, it is among the countries with the highest MM death rates<sup>5 6</sup> and with a high burden of asbestos-related diseases in general.<sup>7</sup> Pleural mesothelioma (PM) incidence and mortality are expected to remain high in the next decades.<sup>8 9</sup> In Italy (decree 308/2002) a national MM registry (Registro Nazionale Mesoteliomi, ReNaM) has been formally established (although some regions had already started registration in the 1990s). ReNaM recorded more than 30,000 MM cases in the period 1993-2018.<sup>10</sup> Construction is among the industries with the largest asbestos use in the past and which is paying the largest toll: out of 17 191 with occupational exposure, 3574 MM cases (20.8%), almost all men, had been exposed in the construction industry.<sup>10</sup>

Recently, a case-control study in Italy showed elevated PM risks for workers of various industries with a large use of asbestos. For male workers ever employed in the construction industry an odds ratio (OR) of 1.94 was found (119 cases, 77 controls), to which contributed several blue collar occupations.<sup>11</sup>

In this work, we performed a “control-initiated case-control study”<sup>12</sup> to examine more in depth the PM relative risks in male construction workers. A control-initiated study is an efficient way to use existing control series to perform a case-control study. Controls could be from a population survey or from the control groups of earlier case-control studies. In this study we took PM cases from the national MM registry and exploited three existing datasets of controls: 1) Controls from the Environment And Genetics in Lung cancer Etiology (EAGLE) study,<sup>13</sup> a large population-based case-control study performed in the Lombardy region in the period 2002-2005 (controls enrolled in 2002-2004), used for PM cases diagnosed in 2000-2009; 2) Controls from the “Multicentre Italian Study on the Etiology of Mesothelioma” MISEM study (quoted in the previous paragraph),<sup>11</sup> a population-based case-control study performed in five Italian regions in the period 2012-2014, used for PM cases diagnosed in 2010-2018; 3) Controls from the “Cholangiocarcinoma Aetiology: Role of Asbestos” (CARA) study (unpublished), a hospital-based case-control study performed in the Emilia-Romagna region in the period 2014-2016, used for PM cases diagnosed in 2010-2018.

We analyzed PM risk for various occupations in the construction sector. We followed and compared two kinds of approaches: 1) Primary approach, in which subjects ever employed in non-construction blue collar

1 occupations for more than 5 years were excluded from both “exposed” (ever employed in construction  
2 occupations) and “reference” (never employed in construction occupations) groups, thus overcoming  
3 potential confounding from asbestos exposure in other occupations; 2) Secondary approach, in which all  
4 subjects (also those employed >5 years in non-construction blue collar occupations) were included.  
5

6  
7 For both approaches we performed four analyses. In the overall analysis we exploited all PM cases  
8 recorded in the whole country (60 million people) by the national registry in the period 2000-2018. In this  
9 way, we could strengthen and possibly expand MISEM results by covering the whole nation and a wider  
10 study period with a larger sample size. Ideally, as in any case-control study, also in control-initiated studies  
11 cases and controls should come from the same study base. In this study, cases came from the whole country  
12 and the whole period, while controls were collected only in some areas in restricted periods. Therefore, in  
13 order to verify the validity of results, we performed three sensitivity analyses by applying time, space, and  
14 time-space restrictions to PM cases in order to more closely match the study base of which controls are a  
15 sample. We previously used a similar approach in two case-control studies on mesothelioma of peritoneum<sup>14</sup>  
16 and of pericardium and tunica vaginalis testis,<sup>15</sup> in which findings using all cases were remarkably similar to  
17 those obtained by applying time or/and space restrictions.  
18  
19  
20  
21  
22  
23  
24  
25  
26

## 27 **METHODS**

### 28 **The National Mesothelioma Registry (ReNaM)**

29  
30 The National Mesothelioma Registry (ReNaM) is an epidemiological surveillance program organized as a  
31 network of regional operating centers (Centri Operativi Regionali, COR). It was formally established by law  
32 277/1991 in 2002 (although some Italian regions had started in the early 1990s). Report of MM cases to  
33 CORs is compulsory (law 277/1991 and 81/2008). However, since reporting is far from complete, CORs  
34 actively search newly diagnosed cases by exploiting several information sources, including databases of  
35 hospital admissions and mortality, archives of pathology reports, and reports of occupational diseases. Based  
36 on the clinical information, confirmed cases are classified as “definite” (histological diagnosis, usually with  
37 immunohistochemical confirmation), “probable” (usually, cytological diagnosis and confirmation by  
38 positive imaging) or “possible” (positive imaging).  
39  
40  
41  
42  
43  
44  
45  
46

47 MM patients or their next-of-kin are then interviewed (mostly face-to-face) by qualified personnel using  
48 a standardized ReNaM questionnaire which investigates lifetime job history: in particular, information about  
49 industry, occupation, tasks, and the working environment are collected for each job. Industries and  
50 occupations are coded respectively using the Italian classifications of industries (ATECO, 1991) and of  
51 occupations (CIP, 1991). The questionnaire also collects lifetime residential histories and occupational  
52 histories of family members.  
53  
54  
55  
56

57 According to ReNaM guidelines, lifetime asbestos exposure is evaluated by experts and classified as  
58 occupational (definite, probable, possible) and (only for non-occupationally exposed cases), extra-  
59 occupational. Subjects with no evidence of asbestos exposure at interview are considered as non-exposed.  
60

This information was not exploited in this paper because the focus is on occupations (independently from asbestos exposure collected at interview).

## Controls

We used three sets of controls enrolled in different geographical areas and periods.

The first set of controls was taken from the EAGLE study.<sup>13</sup> Controls had been randomly sampled in 2002-2004 among 1.6 million residents aged 35-79 years in 216 out of 725 municipalities in five Lombardy (Northern Italy) provinces (Milan, Monza, Brescia, Pavia and Varese, 3.5 million residents). Subjects underwent a computer assisted personal interview using a questionnaire (available on website <https://eagle.cancer.gov/questionnaires.html>) which collected information on lifetime occupational history (industry, occupation, and years of start/stop) for each job carried out for more than six months.

The second set of controls came from the MISEM study, conducted in five regions (Lombardy, Piedmont, and Veneto in Northern Italy, Tuscany in Central Italy, and Apulia in Southern Italy).<sup>11</sup> In Piedmont the population was limited to residents of the province of Turin and the local health district of Casale Monferrato. In Veneto the population from the provinces of Padua and Venice was included. Controls were randomly sampled from residents aged 31-92 years in 2012-2014. Subjects were face-to-face interviewed with the ReNaM questionnaire.

The third set of controls was taken from the CARA study performed in Emilia-Romagna (Northern Italy) in the period 2014-2016. Hospital controls aged 22-92 years were face-to-face interviewed with a detailed questionnaire including occupational sections taken from the ReNaM questionnaire.

Since CARA controls were few and were enrolled in a period overlapping with MISEM, in statistical analyses CARA and MISEM controls were pooled together.

## Cases

From the ReNaM database, we extracted all PM cases diagnosed in the period 2000-2018 with any level of diagnostic certainty (certain, probable, possible). We divided cases in two main periods of incidence (2000-2009 and 2010-2018). We subsequently performed three sensitivity analyses by applying time, space, and time-space restrictions to cases in order to more closely match the study base of controls (see below).

## Coding of industries and occupations

The information used for this work consisted simply of industries and occupations and was collected in a similar way across cases/controls series. Although different persons performed coding, there was some overlap: for cases and MISEM/CARA controls the coders were the same within participating regions; in Lombardy, EAGLE controls and MISEM cases and controls were coded by the same person.

With regard to controls in all three studies, industries and occupations had been coded following the International Standard Industrial Classification of All Economic Activities (ISIC, 1971) and the International Standard Classification of Occupations (ISCO, 1968),<sup>16</sup> respectively. Work histories of controls in the MISEM study had been coded using both Italian and International classifications of industries (ATECO-91 and ISIC-71) and occupations (CIP-91 and ISCO-68).

1 For cases in the ReNaM database, we exploited a recently developed crosswalk to translate Italian CIP-91  
2 codes of occupations into ISCO-68 codes.<sup>17</sup> To improve comparability of cases and controls, we applied the  
3 crosswalk also to MISEM controls.  
4

5 The construction industry was identified with the ISIC-71 code 5000 or the corresponding ATECO-91  
6 code 45. The groups of occupations considered within the construction industry were the ISCO-68 minor  
7 group 95 (Bricklayers, carpenters and other construction workers), and the following three-digit unit group:  
8 Bricklayers, stonemasons and tile setters (951); Reinforced-concreters, cement and terrazzo workers (952);  
9 Roofers (953); Carpenters, joiners and parquetry workers (954); Plasterers (955); Insulators (956); Glaziers  
10 (957); Construction workers not elsewhere classified (959). We also separately analyzed Bricklayers  
11 (95120). In addition, we evaluated PM risk for the following other three-digit unit groups: Electrical  
12 wiremen (855); Electrical linemen and cable jointers (857); Plumbers and pipe fitters (871); Welders and  
13 flame-cutters (872); Sheet-metal workers (873); Structural metal preparers and erectors (874); Painters,  
14 construction (931); Crane and hoist operators (973); Earth-moving and related machinery operators (974);  
15 Motor-vehicle drivers (985); Labourers not elsewhere classified (999).  
16

### 24 **Statistical analysis**

25 We assessed the relative risks of PM associated with ever employment in construction industry. The  
26 majority of construction workers were men, so women were excluded from analyses. We performed  
27 analyses for selected groups of occupations, with subjects ever employed in multiple occupations included  
28 in each analysis.  
29

30 Unconditional logistic regression models adjusted for age (<50, 50-54, 55-59, 60-64, 65-69, 70-74, 75-  
31 79, 80-84, 85+) and period (two periods, 2000-2009 and 2010-2018) were fitted to calculate ORs. We  
32 calculated 90% confidence intervals (CI) in order to avoid a reductive interpretation of CIs as significance  
33 tests.<sup>18</sup> The reference group was made up of subjects never employed in the construction industry.  
34

35 We followed two kinds of approaches:  
36

37 1) Primary approach, in which subjects ever employed in non-construction blue collar occupations for >5  
38 years were excluded from both “exposed” (ever employed in construction occupations) and “reference”  
39 (never employed in construction occupations) categories. A similar approach has been used previously,<sup>19</sup>  
40 and has the advantage to minimize potential confounding from asbestos exposure in other (mainly blue  
41 collar) occupations;  
42

43 2) Secondary approach, theoretically less preferable, in which all subjects (also those employed >5 years  
44 in non-construction blue collar occupations) were included.  
45

46 Blue collar occupations were identified using the following ISCO-68 codes: 55 (Building caretakers,  
47 charworkers, cleaners and related workers); 56 (Lauderers, dry-cleaners and pressers); 581 (Firefighters);  
48 628 (Farm machinery operators); 631 (Loggers); and all the three major groups 7/8/9 (Production and  
49 related workers, transport equipment operators and labourers).<sup>20</sup>  
50

51 For both primary and secondary approaches we performed the following four analyses:  
52  
53  
54  
55  
56  
57  
58  
59  
60



- 1) Analysis 1 (A1). Overall analysis in which we included all cases recorded by ReNaM in 2000-2009 (exploiting EAGLE controls) and 2010-2018 (exploiting MISEM and CARA controls pooled together);
- 2) Analysis 2 (A2). Temporally restricted analyses in which we included only cases first diagnosed in the same years of enrolment of EAGLE (2002-2004) or MISEM/CARA (2012-2016) controls;
- 3) Analysis 3 (A3). Spatially restricted analysis, in which we included only cases living in the same Lombardy Provinces of EAGLE (2000-2009) and in the same six regions of MISEM/CARA (2010-2018) controls;
- 4) Analysis 4 (A4). Temporally and spatially restricted analysis, in which we applied both restrictions of analyses A2 and A3, i.e., cases 2002-2004 living in the same Lombardy Provinces of EAGLE controls and cases 2012-2016 living in the same regions of MISEM/CARA controls. This analysis is theoretically preferable (although based on a smaller sample size) because cases match more closely the study base (the population-time source of controls).

With the primary approach, we performed an overall analysis A1 by length of employment for occupation with at least 10 exposed controls.

Figure 1 shows numbers of cases and controls included in the overall analysis (time and space unrestricted analysis A1) under primary and secondary approach. Supplementary Figures 1-3 show numbers of cases and controls included in time or/and space restricted analysis A2-A4 under primary and secondary approach).

Figure 1 here.

All analyses were performed using Stata 17 (Stata Corp. 2021, College Station, TX, USA).

### Patients and public involvement

We used existing datasets of cases and control. Therefore, subjects could not be involved in the design, or conduct, or reporting, or dissemination plans of our research.

## RESULTS

For the period 2000-2018, 15 592 records for men with PM were extracted from the ReNaM database, 7985 (51.2%) in the period 2000-2009 and 7607 in 2010-2018 (Figure 1). Controls were 2210 in total, 1617 from EAGLE study (2002-2004) and 593 from MISEM/CARA studies (2012-2016, 490 from MISEM, 103 from CARA).

In the whole study period there were 4729 (30.3%) out of 15 592 PM cases ever employed in the construction industry, while controls were 402 (18.2%) among 2210 (Table 1). The proportions of ever employed in construction were remarkably similar in the two periods: among cases, 2372 (29.7%) out of 7985 in 2000-2009 and 2357 (31.0%) out of 7607 in 2010-2018; among EAGLE controls, 299 (18.5%) out of 1617 in 2002-2004 and 103 (17.4%) out of 593 MISEM/CARA controls in 2012-2016.

In both periods the distribution of cases by age was fairly similar to that of controls. The majority of cases (9195, 59.0%) completed a personal interview with the ReNaM questionnaire. A definite diagnosis was available for 13 368 cases (85.7%). Most cases (9499, 60.9%) were of the epithelioid histotype.

**Table 1** Characteristics of pleural mesothelioma cases and controls in men ever/never employed in the construction industry (ISIC-71 code 5000), Italy, 2000–2018

| Variable                  | Ever construction |       |          |       | Never construction |       |          |       |
|---------------------------|-------------------|-------|----------|-------|--------------------|-------|----------|-------|
|                           | Cases             |       | Controls |       | Cases              |       | Controls |       |
|                           | N                 | %     | N        | %     | N                  | %     | N        | %     |
| Total                     | 4729              | 100   | 402      | 100   | 10 863             | 100   | 1808     | 100   |
| Period                    |                   |       |          |       |                    |       |          |       |
| 2000-2009                 | 2372              | 50.2  | 299      | 74.4  | 5613               | 51.7  | 1318     | 72.9  |
| 2010-2018                 | 2357              | 49.8  | 103      | 25.6  | 5250               | 48.3  | 490      | 27.1  |
| Age (years)               |                   |       |          |       |                    |       |          |       |
| <50                       | 112               | 2.4   | 17       | 4.2   | 272                | 2.5   | 90       | 5.0   |
| 50-54                     | 171               | 3.6   | 25       | 6.2   | 359                | 3.3   | 98       | 5.4   |
| 55-59                     | 360               | 7.6   | 48       | 11.9  | 767                | 7.1   | 223      | 12.3  |
| 60-64                     | 553               | 11.7  | 66       | 16.4  | 1344               | 12.4  | 304      | 16.8  |
| 65-69                     | 858               | 18.1  | 98       | 24.4  | 1825               | 16.8  | 435      | 24.1  |
| 70-74                     | 966               | 20.4  | 91       | 22.6  | 2192               | 20.2  | 371      | 20.5  |
| 75-79                     | 926               | 19.6  | 45       | 11.2  | 2107               | 19.4  | 234      | 12.9  |
| 80-84                     | 538               | 11.4  | 10       | 2.5   | 1282               | 11.8  | 36       | 2.0   |
| 85+                       | 245               | 5.2   | 2        | 0.5   | 715                | 6.6   | 17       | 0.9   |
| Mean (SD)                 | 70.4              | (9.5) | 66.2     | (8.7) | 70.7               | (9.8) | 66.1     | (9.1) |
| Interview                 |                   |       |          |       |                    |       |          |       |
| Direct                    | 2933              | 62.0  | 402      | 100   | 6262               | 57.7  | 1808     | 100   |
| Next-of-kin               | 1709              | 36.1  |          |       | 4242               | 39.0  |          |       |
| None                      | 78                | 1.7   |          |       | 278                | 2.6   |          |       |
| Other                     | 9                 | 0.2   |          |       | 81                 | 0.7   |          |       |
| Diagnosis                 |                   |       |          |       |                    |       |          |       |
| Definite                  | 4117              | 87.1  |          |       | 9251               | 85.2  |          |       |
| Probable                  | 347               | 7.3   |          |       | 802                | 7.4   |          |       |
| Possible                  | 265               | 5.6   |          |       | 810                | 7.5   |          |       |
| Morphology*               |                   |       |          |       |                    |       |          |       |
| Mesothelioma, NOS (90503) | 450               | 9.5   |          |       | 1081               | 9.9   |          |       |
| Fibrous (90513)           | 479               | 10.1  |          |       | 1007               | 9.3   |          |       |
| Epithelioid (90523)       | 2897              | 61.3  |          |       | 6602               | 60.8  |          |       |
| Biphasic (90533)          | 583               | 12.3  |          |       | 1237               | 11.4  |          |       |
| Not available             | 320               | 6.8   |          |       | 936                | 8.6   |          |       |

\*Codes of the International Classification of Diseases for Oncology, Third Edition in parentheses.

ISIC, International Standard Industry Classification (1971); NOS, not otherwise specified.

Percentages may not add to 100 due to rounding.

## Primary approach

Using the primary approach (subjects employed for >5 years in non-construction blue collar occupations excluded), in the overall analysis A1 (time and space unrestricted) an OR of 3.64 was calculated for subjects ever employed in construction (2181 cases) (Table 2). This increase was driven by numerous blue collar occupations (OR 4.52), especially the large category of Bricklayers, carpenters and other construction workers (OR 5.83). Within this category, high relative risks were found Bricklayers (OR 7.05) and construction workers not elsewhere classified (OR 4.66), and also for other less represented occupations, although with a low number of controls. Elevated risks were also for several other occupations, the most represented being plumbers and pipe-fitters (OR 9.13) and painters (OR 2.17). OR could not be calculated for occupations 952, 955, 957, 872, 873, and 973.

**Table 2** Pleural mesothelioma odds ratios (OR) and 90% confidence intervals (CI) for selected occupations in men in the construction industry (ISIC-71 code 5000), Italy, 2000–2018. Results of the primary approach (subjects ever employed in non-construction blue collar occupations for >5 years excluded), analysis A1

| Occupation (ISCO-68 code)                                          | Cases | Controls | OR*  | 90% CI    |
|--------------------------------------------------------------------|-------|----------|------|-----------|
| Total                                                              | 4797  | 1085     |      |           |
| Never employed in construction                                     | 2616  | 878      | 1.00 | Reference |
| Ever employed in construction                                      | 2181  | 207      | 3.64 | 3.17-4.19 |
| Blue collars (55, 56, 581, 628, 631, 7-9)                          | 1993  | 151      | 4.52 | 3.87-5.29 |
| Bricklayers, carpenters, and other construction workers (95)       | 1367  | 79       | 5.83 | 4.75-7.15 |
| Bricklayers, stonemasons and tile setters (951)                    | 1054  | 50       | 7.17 | 5.58-9.21 |
| Bricklayers (95120)                                                | 988   | 47       | 7.05 | 5.45-9.12 |
| Reinforced concreters, cement finishers and terrazzo workers (952) | 12    | 0        | NC   |           |
| Roofers (953)                                                      | 27    | 1        | 12.3 | 2.28-66.1 |
| Carpenters, joiners and parquetry workers (954)                    | 73    | 4        | 6.88 | 2.92-16.2 |
| Plasterers (955)                                                   | 14    | 0        | NC   |           |
| Insulators (956)                                                   | 57    | 4        | 6.27 | 2.64-14.8 |
| Glaziers (957)                                                     | 0     | 4        | NC   |           |
| Construction workers not elsewhere classified (959)                | 320   | 22       | 4.66 | 3.21-6.77 |
| Other blue collar occupations                                      |       |          |      |           |
| Electrical wiremen (855)                                           | 97    | 16       | 2.34 | 1.48-3.69 |
| Electrical linemen and cable jointers (857)                        | 41    | 4        | 3.79 | 1.58-9.13 |
| Plumbers and pipe fitters (871)                                    | 305   | 12       | 9.13 | 5.58-14.9 |
| Welders and flame-cutters (872)                                    | 3     | 0        | NC   |           |
| Sheet-metal workers (873)                                          | 16    | 0        | NC   |           |
| Structural metal preparers and erectors (874)                      | 34    | 1        | 13.1 | 2.51-71.6 |
| Painters, construction (931)                                       | 104   | 18       | 2.17 | 1.41-3.36 |
| Crane and hoist operators (973)                                    | 17    | 0        | NC   |           |
| Earth-moving and related machinery operators (974)                 | 48    | 7        | 2.39 | 1.20-4.75 |
| Motor-vehicle drivers (985)                                        | 14    | 4        | 1.05 | 0.39-2.81 |
| Labourers not elsewhere classified (999)                           | 31    | 3        | 3.43 | 1.24-9.48 |

ISCO, International Standard Classification of Occupations (1968); ISIC, International Standard Industry Classification (1971); NC, not calculable.

\*OR calculated with unconditional logistic regression models adjusted for age (categorical) and period.

The pattern of analysis A1 was largely confirmed in primary time or/and space restricted analyses A2-A4 (Figures 2-3).

Figures 2 and 3 here

The analysis by length of employment (in which we excluded a few subjects who lacked years of start/stop work) shows that PM risk was increased also for those who worked for less than years (there were no positive trends when we excluded the reference category, except for the minor group 95) (Supplementary Table 1).

### Secondary approach

With the secondary approach (all subjects included, also those employed for >5 years in non-construction blue collar occupations), in the overall analysis A1 (time and space unrestricted) we observed a pattern similar to that obtained with the primary approach, but ORs were remarkably lower (Supplementary Table 2). Also in this case the time or/and space restricted analyses A2-A4 yielded results in general quite similar to those of the overall analysis A1 (Supplementary Figures 4-5).

## DISCUSSION

1 In this nationwide Italian study covering a long period (2000-2018), with the primary approach (in which  
2 subjects ever employed in non-construction blue collar occupations for >5 years were excluded) we found in  
3 males markedly elevated risks of pleural mesothelioma for most blue collar occupations in the construction  
4 industry, in particular (in order of number of cases): bricklayers; general construction workers (i.e.,  
5 construction workers not elsewhere classified); plumbers and pipe fitters; painters; electrical wiremen;  
6 carpenters, joiners and parquetry workers; insulators; earth-moving and related machinery operators;  
7 electrical linemen and cable jointers; structural metal preparers and erectors; labourers; roofers. Findings of  
8 this primary approach were in general highly consistent across various supplementary analyses with  
9 different study base samples (i.e., with space/time restriction inclusion of cases).

10 These results cannot be generalized to countries with different patterns/degrees of industrialization or  
11 which used different type of asbestos. Unlike other countries (e.g., France where almost all the asbestos used  
12 was imported and chrysotile was the most common used type),<sup>21</sup> in Italy asbestos was produced and used in  
13 all forms to produce asbestos-cement products for the construction industry.<sup>22</sup> Moreover, in Italy there are  
14 many small and medium construction enterprises, so that workers in various occupations (including the large  
15 group of bricklayers) may perform a variety of tasks and/or work in close contact with workers performing  
16 tasks entailing asbestos exposure.<sup>23</sup> Finally, although there are real differences in working practices in the  
17 construction sector across countries, we cannot exclude that the large number of bricklayers among cases in  
18 our study may be due to coding procedures, e.g., use of ISCO-68 code 95120 instead of less specific codes  
19 95910 (Housebuilders) or 95990 (Other construction workers), as already noted in a large pooled analysis of  
20 case-control study on lung cancer.<sup>24</sup> These factors might explain the large number of bricklayers among  
21 cases in our study and the elevated risks we found for most occupations in the construction sector.

22 Our findings are in agreement with many studies published in various countries. Just to name a few,  
23 studies that showed increased mesothelioma risks in the construction sector and in various occupations  
24 therein were performed in Canada,<sup>25</sup> France,<sup>26</sup> Italy,<sup>11</sup> Spain,<sup>27</sup> Nordic countries,<sup>28-31</sup> UK,<sup>19 32 33</sup> and USA.<sup>34</sup>  
25 <sup>35</sup> Our results are largely plausible. Asbestos (all forms) has been widely used worldwide in the construction  
26 industry due to its physical properties (flame-retardant, sound-absorbing, electrical and heat resistance) in  
27 insulation works (e.g., pipes, chimneys) and to build roofs with corrugated asbestos-cement sheets. In  
28 Europe, estimates of the number of workers exposed to asbestos have been developed by CAREX  
29 (CARcinogen EXposure). Based on data collected during 1990-1993, it has been estimated that, out of a  
30 total of 1.2 million workers exposed to asbestos, those employed in the construction industry were 574 000<sup>1</sup>  
31 and that 5.2% of male workers in construction industry were exposed to asbestos.<sup>36</sup> Some occupational  
32 groups used asbestos directly (e.g., insulators and roofers, plumbers and pipe fitters), while other might have  
33 been exposed indirectly because they worked in areas where other workers handled asbestos (e.g.,  
34 electricians, carpenters, painters, concrete workers, maintenance workers).<sup>37</sup> Finally, many workers have  
35 been exposed because involved in removal of asbestos-containing materials. It should be added that  
36 preventive measures (technical, organizational, and personal) are difficult to implement in this complex

sector in which several tasks are performed by different workers within shared and always changing environments, especially in small or medium size companies.

Therefore, due to the large number of workers and the difficulty of implementing preventive measures, the construction industry suffers the largest mesothelioma burden in many countries. For instance, a study in UK estimated that asbestos was responsible for more than half of the cancer registrations in construction and 70% of cancer deaths (2568 deaths, including 1249 lung cancers and 1292 mesotheliomas).<sup>38</sup> In Italy, in the period 1993-2018, the construction industry ranked first in the number of mesothelioma cases (3574, 16.2%) reported to ReNaM, including 1332 bricklayers, 383 general construction workers, 232 plumbers and pipe fitters, 140 stonemasons, 117 electricians, and 114 insulators.<sup>39</sup> Moreover, the proportion of cases among construction workers showed an increasing trend from 15.8% in the 1993-1998 period to 23.9% in 2014-2018.<sup>10</sup>

### **Asbestos exposure after the asbestos ban (1992)**

Findings in this study mostly concern exposure occurred before the asbestos ban in 1992. However, it has been estimated that more than 30 million tons of asbestos-containing material was installed in the Italian territory in 1992 and that about 23 million tons are yet to be reclaimed.<sup>40</sup> In an update of CAREX for Italy (2000-2003) it was estimated that 70 000 workers were still exposed to asbestos.<sup>41</sup> Hence, asbestos exposure continued to occur after the ban and may do in future years or decades unless adequate preventive measures are used during asbestos removal. A recent study in Italy covering the period 1996-2013 showed that workers employed in the removal and disposal of asbestos-containing materials may be exposed to asbestos levels above the national action limit (0.01 fibers/cc) and occasionally also the European action limit at 0.1 fibers/cc.<sup>42</sup>

### **Strengths and limitations**

The study has several strengths. First, the pleural mesothelioma case series was extracted from the database of a national registry (ReNaM) in which active search for MM cases is performed according to common procedures: in particular, standardized criteria are used for MM diagnosis classification and collection and evaluation of lifetime job histories collected by a structured questionnaire.<sup>10</sup> Second, our study included MM cases from the whole country and covered a large time window (2000-2018). This was possible thanks to a recently developed crosswalk which allowed translation of thousands of Italian codes of occupations into international (ISCO-68) codes.<sup>17</sup> Third, we used three control series for the large majority (95.3%) randomly sampled from the general population (EAGLE and MISEM studies). Fourth, in analogy with others studies,<sup>19</sup> we could perform analyses in which we excluded subjects employed in non-construction blue-collar occupations for more than 5 years: this approach reduced potential confounding from asbestos exposure in non-construction occupations and yielded relative risk estimates markedly higher than the other approach (in which all subjects were included).<sup>11 26</sup>

The study has some limitations. First, although the three control series covered about 30 million people (half of the Italian population) over eight years, the overlap of cases with controls was only partial.

1 However, the various time and space restricted supplementary analyses produced quite consistent results,  
2 with few exceptions, showing that theoretically less preferable samples of the study base performed quite  
3 well in practice. This is in agreement with previous studies on peritoneal mesothelioma in Lombardy<sup>14</sup> and  
4 on mesothelioma of pericardium and tunica vaginalis testis in Italy.<sup>15</sup> A similar approach, though criticized,  
5 proved to be valid also in case-control studies on pleural mesothelioma in France.<sup>43-45</sup> A second limitation  
6 regards information quality, since in the various studies different persons performed data collection.  
7 However, the personnel was adequately trained and we used only simple information on industries and  
8 occupations: hence, we do not expect substantially different accuracy across studies and case-control status.  
9 Conversely, errors and heterogeneity in coding occupations are likely because the international codes of  
10 industries and occupations were assigned by different persons or were derived from Italian codes by  
11 applying a crosswalk, which probably caused some degree of misclassification of occupations.  
12  
13  
14  
15  
16  
17  
18  
19  
20

## 21 CONCLUSIONS

22 This work was made possible thanks to data collected through an epidemiological surveillance system of  
23 mesothelioma covering the whole Italian territory since more than 20 years. In this nationwide case-control  
24 study with almost all controls sampled from the general population, we found clearly increased pleural  
25 mesothelioma risk for most occupations in the construction industry. This is largely plausible given the past  
26 widespread use of asbestos in this economic sector and is consistent with findings in international literature.  
27 Our results are relevant for compensation of workers affected with mesothelioma in the construction  
28 industry.  
29  
30  
31  
32  
33

34 Given that huge amounts of asbestos-containing materials are still present in the environment, the  
35 potential for asbestos exposure still exists if adequate technical, organizational, and personal preventive  
36 measures are not taken during asbestos manipulation. In the future special attention to surveillance of  
37 mesothelioma (and other asbestos-related diseases like lung cancer) must be given for workers employed in  
38 asbestos removal after the asbestos ban in 1992.  
39  
40  
41  
42  
43  
44  
45  
46  
47  
48  
49  
50  
51  
52  
53  
54  
55  
56  
57  
58  
59  
60

1  
2 **Acknowledgements** The authors thank all personnel involved in epidemiological surveillance of  
3 mesothelioma incidence and asbestos exposure assessment and the affected subjects and their family  
4 members for granting interviews.  
5  
6

7  
8  
9 **Contributors** SS: statistical analysis, manuscript drafting; DC, conceptualization, study design, statistical  
10 supervision, manuscript drafting; EM: manuscript drafting and statistical analysis (MISEM study); DCa,  
11 LV: data collection (MISEM study); MTL, NEC: principal investigators (EAGLE study); SC, SM, GB:  
12 principal investigators, data collection (CARA study); AS, LM, SP, CG, SE, SMu, VC, VCo, CN, FDA,  
13 CGe, LB, AR, IG, GM, IC, ER, TS, FC, ML, FT, GC, MM: data collection (Regional Operating Centers);  
14 AM: director (ReNaM), study conceptualization; AB: data management (ReNaM); CM: study design, data  
15 collection, manuscript drafting. All authors contributed to interpretation of findings and discussion. All  
16 authors revised and approved the manuscript for intellectual content.  
17  
18  
19  
20  
21  
22

23  
24 **Funding** This work was partially supported by the Istituto Nazionale per l'Assicurazione contro gli Infortuni  
25 sul Lavoro (INAIL), Rome, Italy: Project BRIC ID 55 (2019).  
26  
27

28  
29 **Competing interests** DC, SM, CM served as consultants in trials concerning asbestos-related diseases.  
30

31 **Patient consent for publication** As reporting of mesothelioma to the National Mesothelioma Registry  
32 (ReNaM) is compulsory by law (277/1991 and 81/2008), ethics approval is not required for cases. In the  
33 EAGLE, MISEM, and CARA studies, enrolled subjects signed an informed consent form.  
34  
35  
36

37  
38 **Ethics approval** The EAGLE, MISEM, and CARA studies were approved by the following institutional  
39 review boards (IRBs): National Cancer Institute Special Studies IRB: 01-C-N211, National Cancer Institute,  
40 Bethesda, Maryland, USA (EAGLE); Comitato Etico Interaziendale, AOU San Giovanni Battista di Torino  
41 and AO CTO/MariaAdelaide di Torino, Turin, Italy: CEI-589 (MISEM); Comitato Etico del Policlinico di  
42 Sant'Orsola, Bologna, Italy: 111/2013/U/OssN (CARA).  
43  
44  
45  
46

47  
48 **Provenance and peer review** Not commissioned; externally peer reviewed.  
49  
50

51  
52 **Data availability statement** Data are not publicly available.  
53  
54

## 55 **ORCID iDs**

56  
57 Simona Stella <http://orcid.org/0000-0003-4276-2583>

58 Dario Consonni <http://orcid.org/0000-0002-8935-3843>

59 Enrica Migliore <http://orcid.org/0000-0003-0121-6295>  
60

1 Domenica Cavone <http://orcid.org/0000-0002-2009-1806>  
2 Luigi Vimercati <http://orcid.org/0000-0002-4072-2871>  
3 Lucia Miligi <http://orcid.org/0000-0002-8223-485X>  
4 Sara Piro <http://orcid.org/0000-0003-4198-7035>  
5 Neil E Caporaso <http://orcid.org/0000-0001-7562-4609>  
6 Stefania Curti <http://orcid.org/0000-0003-4343-8873>  
7 Stefano Mattioli <http://orcid.org/0000-0002-9639-7430>  
8 Giovanni Brandi <http://orcid.org/0000-0003-0013-2858>  
9 Corrado Negro <http://orcid.org/0000-0002-2007-3608>  
10 Carlo Genova <http://orcid.org/0000-0003-3690-8582>  
11 Antonio Romanelli <http://orcid.org/0000-0003-4899-1889>  
12 Iolanda Grappasonni <http://orcid.org/0000-0003-1131-4286>  
13 Ilaria Cozzi <http://orcid.org/0000-0003-0313-9799>  
14 Tommaso Staniscia <http://orcid.org/0000-0002-5077-515X>  
15 Federico Tallarigo <http://orcid.org/0000-0002-4131-9531>  
16 Alessandro Marinaccio <http://orcid.org/0000-0001-9068-2137>  
17 Alessandra Binazzi <http://orcid.org/0000-0002-0435-600X>  
18 Carolina Mensi <http://orcid.org/0000-0002-9075-3684>  
19  
20  
21  
22  
23  
24  
25  
26  
27  
28  
29  
30  
31  
32  
33  
34  
35  
36  
37  
38  
39  
40  
41  
42  
43  
44  
45  
46  
47  
48  
49  
50  
51  
52  
53  
54  
55  
56  
57  
58  
59  
60



**REFERENCES**

1. IARC Monographs on the Evaluation of Carcinogenic Risks to Humans. *Arsenic, Metals, Fibres, and Dusts*. Lyon, France: International Agency for Research on Cancer, 2012.
2. Global, regional, and national comparative risk assessment of 84 behavioural, environmental and occupational, and metabolic risks or clusters of risks for 195 countries and territories, 1990-2017: a systematic analysis for the Global Burden of Disease Study 2017. *Lancet* 2018;392(10159):1923-94.
3. GBD 2016 Occupational Carcinogens Collaborators. Global and regional burden of cancer in 2016 arising from occupational exposure to selected carcinogens: a systematic analysis for the Global Burden of Disease Study 2016. *Occup Environ Med* 2020;77(3):151-9.
4. Odgerel CO, Takahashi K, Sorahan T, *et al*. Estimation of the global burden of mesothelioma deaths from incomplete national mortality data. *Occup Environ Med* 2017;74(12):851-8.
5. Park EK, Takahashi K, Hoshuyama T, *et al*. Global magnitude of reported and unreported mesothelioma. *Environ Health Perspect* 2011;119(4):514-8.
6. Rath EM, Yuen ML, Odgerel CO, *et al*. The Ecological Association between Asbestos Consumption and Asbestos-Related Diseases 15 Years Later. *Environ Health Perspect* 2022;130(5):57703.
7. Fazzo L, Binazzi A, Ferrante D, *et al*. Burden of Mortality from Asbestos-Related Diseases in Italy. *Int J Environ Res Public Health* 2021;18(19).
8. Oddone E, Bollon J, Nava CR, *et al*. Predictions of Mortality from Pleural Mesothelioma in Italy After the Ban of Asbestos Use. *Int J Environ Res Public Health* 2020;17(2).
9. Oddone E, Bollon J, Nava CR, *et al*. Effect of Asbestos Consumption on Malignant Pleural Mesothelioma in Italy: Forecasts of Mortality up to 2040. *Cancers (Basel)* 2021;13(13).
10. Binazzi A, Di Marzio D, Verardo M, *et al*. Asbestos Exposure and Malignant Mesothelioma in Construction Workers-Epidemiological Remarks by the Italian National Mesothelioma Registry (ReNaM). *Int J Environ Res Public Health* 2021;19(1).
11. Migliore E, Consonni D, Peters S, *et al*. Pleural mesothelioma risk by industry and occupation: results from the Multicentre Italian Study on the Etiology of Mesothelioma (MISEM). *Environ Health* 2022;21(1):60.
12. Greenland S. Control-initiated case-control studies. *Int J Epidemiol* 1985;14(1):130-4.
13. Landi MT, Consonni D, Rotunno M, *et al*. Environment And Genetics in Lung cancer Etiology (EAGLE) study: an integrative population-based case-control study of lung cancer. *BMC Public Health* 2008;8:203.
14. Consonni D, Calvi C, De Matteis S, *et al*. Peritoneal mesothelioma and asbestos exposure: a population-based case-control study in Lombardy, Italy. *Occup Environ Med* 2019;76(8):545-53.
15. Marinaccio A, Consonni D, Mensi C, *et al*. Association between asbestos exposure and pericardial and tunica vaginalis testis malignant mesothelioma: a case-control study and epidemiological remarks. *Scand J Work Environ Health* 2020;46(6):609-17.
16. Consonni D, De Matteis S, Lubin JH, *et al*. Occupational risks for lung cancer in a population-based case-control study. *Am J Epidemiol* 2010;171(3):323-33.

17. Spinazze A, Consonni D, Borghi F, *et al.* Development of a Crosswalk to Translate Italian Occupation Codes to ISCO-68 Codes. *Ann Work Expo Health* 2022;66(6):815-21.
18. Sterne JA, Davey Smith G. Sifting the evidence-what's wrong with significance tests? *BMJ* 2001;322(7280):226-31.
19. Rake C, Gilham C, Hatch J, *et al.* Occupational, domestic and environmental mesothelioma risks in the British population: a case-control study. *Br J Cancer* 2009;100(7):1175-83.
20. Ahrens W, Merletti F. A standard tool for the analysis of occupational lung cancer in epidemiologic studies. *Int J Occup Environ Health* 1998;4(4):236-40.
21. Lacourt A, Gramond C, Rolland P, *et al.* Occupational and non-occupational attributable risk of asbestos exposure for malignant pleural mesothelioma. *Thorax* 2014;69(6):532-9.
22. Mensi C, Riboldi L, De Matteis S, *et al.* Impact of an asbestos cement factory on mesothelioma incidence: global assessment of effects of occupational, familial, and environmental exposure. *Environ Int* 2015;74:191-9.
23. Vimercati L, Cavone D, De Maria L, *et al.* Mesothelioma risk among construction workers according to job title: data from the Italian Mesothelioma Register. *Med Lav* 2023;114(3):e2023025.
24. Consonni D, De Matteis S, Pesatori AC, *et al.* Lung cancer risk among bricklayers in a pooled analysis of case-control studies. *Int J Cancer* 2015;136(2):360-71.
25. DeBono NL, Warden H, Logar-Henderson C, *et al.* Incidence of mesothelioma and asbestosis by occupation in a diverse workforce. *Am J Ind Med* 2021;64(6):476-87.
26. Rolland P, Gramond C, Lacourt A, *et al.* Occupations and industries in France at high risk for pleural mesothelioma: A population-based case-control study (1998-2002). *Am J Ind Med* 2010;53(12):1207-19.
27. Agudo A, Gonzalez CA, Bleda MJ, *et al.* Occupation and risk of malignant pleural mesothelioma: A case-control study in Spain. *Am J Ind Med* 2000;37(2):159-68.
28. Plato N, Martinsen JI, Sparen P, *et al.* Occupation and mesothelioma in Sweden: updated incidence in men and women in the 27 years after the asbestos ban. *Epidemiol Health* 2016;38:e2016039.
29. Pukkala E, Martinsen JI, Lynge E, *et al.* Occupation and cancer - follow-up of 15 million people in five Nordic countries. *Acta Oncol* 2009;48(5):646-790.
30. Jarvholm B, Englund A. The impact of asbestos exposure in Swedish construction workers. *Am J Ind Med* 2014;57(1):49-55.
31. Engholm G, Englund A. Asbestos hazard in the Swedish construction industry--recent trends in mesothelioma incidence. *Scand J Work Environ Health* 2005;31 Suppl 2:27-30.
32. Coggon D, Inskip H, Winter P, *et al.* Differences in occupational mortality from pleural cancer, peritoneal cancer, and asbestosis. *Occup Environ Med* 1995;52(11):775-7.
33. Frost G, Harding AH, Darnton A, *et al.* Occupational exposure to asbestos and mortality among asbestos removal workers: a Poisson regression analysis. *Br J Cancer* 2008;99(5):822-9.
34. Tomasallo CD, Christensen KY, Raymond M, *et al.* An Occupational Legacy: Malignant Mesothelioma Incidence and Mortality in Wisconsin. *J Occup Environ Med* 2018;60(12):1143-9.
35. Ringen K, Dement J, Hines S, *et al.* Mortality of older construction and craft workers employed at department of energy nuclear sites: Follow-up through 2016. *Am J Ind Med* 2019;62(9):742-54.

- 1 36. Driscoll T, Nelson DI, Steenland K, *et al.* The global burden of disease due to occupational carcinogens. *Am J Ind*  
2 *Med* 2005;48(6):419-31.
- 3 37. Jarvholm B. Carcinogens in the construction industry. *Ann N Y Acad Sci* 2006;1076:421-8.
- 4 38. Hutchings SJ, Rushton L. Occupational cancer in Britain. Industry sector results. *Br J Cancer* 2012;107 Suppl 1:S92-  
5 S103.
- 6 39. Marinaccio A, Binazzi A, Di Marzio D, *et al.* Il Registro Nazionale dei Mesoteliomi. Settimo Rapporto. Rome: INAIL,  
7 2021:1-258 (Italian).
- 8 40. Angelini A, Silvestri S. Asbestos Removal Acceleration for New Jobs and Fossil Fuel Use Reduction for Public  
9 Health and Climate Readiness: A Contribution to the Revival of the Italian Economy Post-COVID-19. *New Solut*  
10 2022;31(4):434-40.
- 11 41. Mirabelli D, Kauppinen T. Occupational exposures to carcinogens in Italy: an update of CAREX database. *Int J*  
12 *Occup Environ Health* 2005;11(1):53-63.
- 13 42. Scarselli A, Corfiati M, Di Marzio D. Occupational exposure in the removal and disposal of asbestos-containing  
14 materials in Italy. *Int Arch Occup Environ Health* 2016;89(5):857-65.
- 15 43. Lacourt A, Leveque E, Guichard E, *et al.* Dose-time-response association between occupational asbestos exposure  
16 and pleural mesothelioma. *Occup Environ Med* 2017;74(9):691-7.
- 17 44. Lacourt A, Leveque E, Goldberg M, *et al.* Dose-time response association between occupational asbestos  
18 exposure and pleural mesothelioma: authors' response. *Occup Environ Med* 2018;75(2):161-2.
- 19 45. Boffetta P, Pira E, Romano C, *et al.* Response to: 'Dose-time-response association between occupational asbestos  
20 exposure and pleural mesothelioma' by Lacourt *et al.* *Occup Environ Med* 2018;75(2):160.
- 21  
22  
23  
24  
25  
26  
27  
28  
29  
30  
31  
32  
33  
34  
35  
36  
37  
38  
39  
40  
41  
42  
43  
44  
45  
46  
47  
48  
49  
50  
51  
52  
53  
54  
55  
56  
57  
58  
59  
60

## Figure legends

**Figure 1** Diagram showing numbers of male pleural mesothelioma cases and controls across the years and their main characteristics, Italy, 2000-2018. Cases from all years and areas (analysis A1). In the primary approach subjects ever employed in non-construction blue collar occupations for >5 years were excluded; in the secondary approach all subjects (also those ever employed in non-construction blue collar occupation for >5 years) were included.

### Figure 1 footnotes

Abbreviations: CARA, Cholangiocarcinoma Aetiology: Role of Asbestos; EAGLE, Environment And Genetics in Lung cancer Etiology; MISEM, Multicentre Italian Study on the Etiology of Mesothelioma; ReNaM, Registro Nazionale Mesoteliomi

**Figure 2** Pleural mesothelioma odds ratios (OR) and 90% confidence intervals (CI) for selected occupations in men in the construction industry (ISIC-71 code 5000) in four analyses, Italy, 2000–2018. Results of the primary approach (subjects ever employed in non-construction blue collar occupations for >5 years excluded): ever employed in construction, blue collars, and three-digits ISCO-68 unit groups within minor group 95 “Bricklayers, carpenters and other construction workers”. A1: overall analysis using all Italian cases, 2000-2018; A2: analysis with cases selected from the same periods of controls; A3: analysis with cases selected from the same areas of controls; A4; analysis with cases selected from the same periods and areas of controls. In parentheses the International Standard Classification of Occupations (ISCO, 1968) codes.

**Figure 3** Pleural mesothelioma odds ratios (OR) and 90% confidence intervals (CI) for selected occupations in men in the construction industry (ISIC-71 code 5000) in four analyses, Italy, 2000–2018. Results of the primary approach (subjects ever employed in non-construction blue collar occupations for >5 years excluded): other three-digit ISCO-68 unit groups. A1: overall analysis using all Italian cases, 2000-2018; A2: analysis with cases selected from the same periods of controls; A3: analysis with cases selected from the same areas of controls; A4; analysis with cases selected from the same periods and areas of controls. In parentheses the International Standard Classification of Occupations (ISCO, 1968) codes.

| Period    | Year    | N. cases<br>Primary/<br>secondary<br>approach | Case source                                                                                                                                               | Control source                                                                                                                                                                                 |
|-----------|---------|-----------------------------------------------|-----------------------------------------------------------------------------------------------------------------------------------------------------------|------------------------------------------------------------------------------------------------------------------------------------------------------------------------------------------------|
| 2000-2018 | 2000    | 227/682                                       | <b>NATIONAL<br/>MESOTHELIOMA<br/>REGISTRY</b><br>Living in any Region<br>ReNaM questionnaire<br><b>Primary/secondary<br/>approach:<br/>N. 4797/15 592</b> |                                                                                                                                                                                                |
|           | 2001    | 207/734                                       |                                                                                                                                                           |                                                                                                                                                                                                |
|           | 2002    | 214/760                                       |                                                                                                                                                           | <b>EAGLE</b> Living in 216 municipalities in five<br>Lombardy Provinces<br>(Milan, Monza, Brescia, Pavia, Varese)<br>EAGLE questionnaire<br><b>Primary/secondary approach:<br/>N. 778/1617</b> |
|           | 2003    | 238/758                                       |                                                                                                                                                           |                                                                                                                                                                                                |
|           | 2004    | 246/768                                       |                                                                                                                                                           |                                                                                                                                                                                                |
|           | 2005    | 259/861                                       |                                                                                                                                                           |                                                                                                                                                                                                |
|           | 2006    | 242/782                                       |                                                                                                                                                           |                                                                                                                                                                                                |
|           | 2007    | 248/882                                       |                                                                                                                                                           |                                                                                                                                                                                                |
|           | 2008    | 240/857                                       |                                                                                                                                                           |                                                                                                                                                                                                |
|           | 2009    | 285/901                                       |                                                                                                                                                           |                                                                                                                                                                                                |
|           | 2010    | 271/851                                       |                                                                                                                                                           |                                                                                                                                                                                                |
|           | 2011    | 254/886                                       |                                                                                                                                                           |                                                                                                                                                                                                |
|           | 2012    | 288/886                                       |                                                                                                                                                           | <b>MISEM</b> Living in five Regions (Apulia,<br>Lombardy, Piedmont,<br>Tuscany, Veneto)<br>ReNaM questionnaire<br><b>Primary/secondary approach: N. 250/490</b>                                |
|           | 2013    | 304/979                                       |                                                                                                                                                           |                                                                                                                                                                                                |
|           | 2014    | 289/928                                       |                                                                                                                                                           | <b>CARA</b> Living in one Region<br>(Emilia-Romagna)<br>ReNaM questionnaire<br><b>Primary/secondary approach:<br/>N. 57/103</b>                                                                |
|           | 2015    | 283/921                                       |                                                                                                                                                           |                                                                                                                                                                                                |
| 2016      | 294/910 |                                               |                                                                                                                                                           |                                                                                                                                                                                                |
| 2017      | 287/841 |                                               |                                                                                                                                                           |                                                                                                                                                                                                |
| 2018      | 121/405 |                                               |                                                                                                                                                           |                                                                                                                                                                                                |

1

Figure 1

210x297mm (200 x 200 DPI)

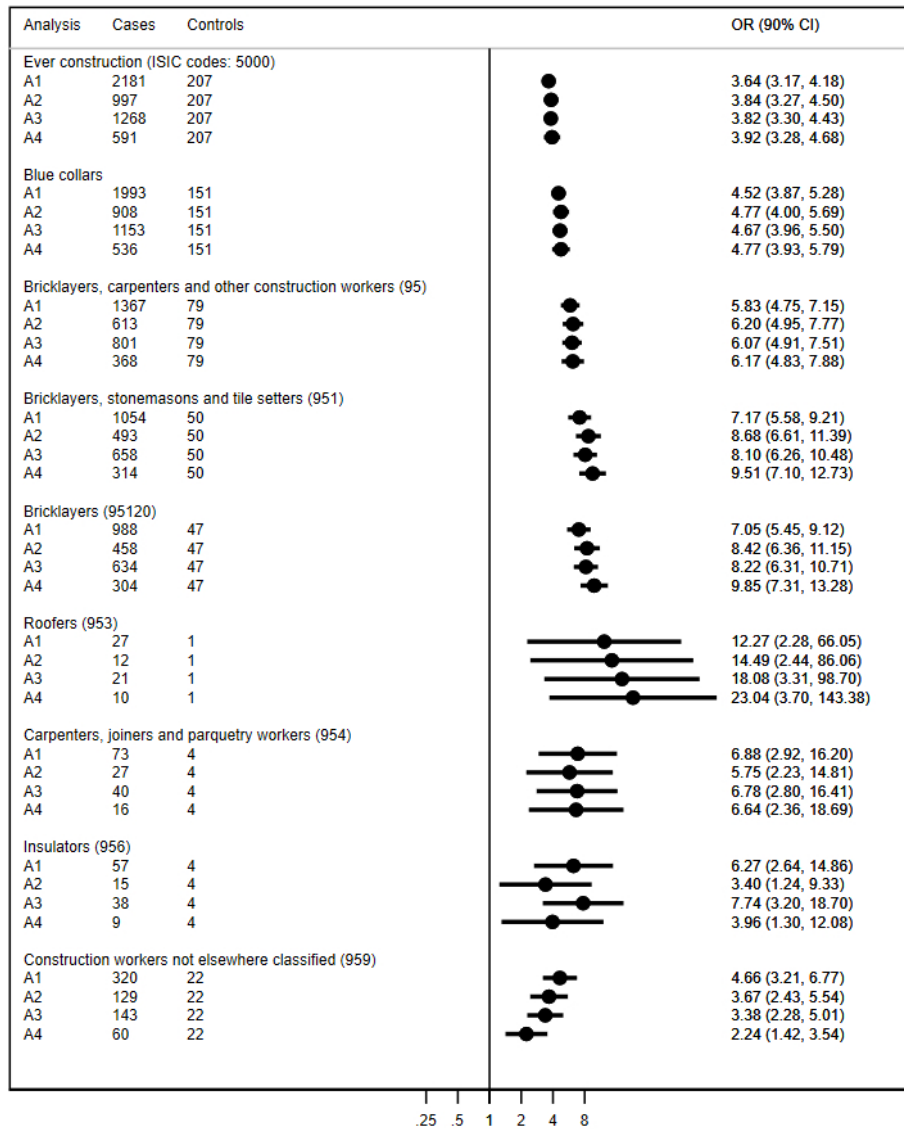

Figure 2

272x329mm (72 x 72 DPI)

1  
2  
3  
4  
5  
6  
7  
8  
9  
10  
11  
12  
13  
14  
15  
16  
17  
18  
19  
20  
21  
22  
23  
24  
25  
26  
27  
28  
29  
30  
31  
32  
33  
34  
35  
36  
37  
38  
39  
40  
41  
42  
43  
44  
45  
46  
47  
48  
49  
50  
51  
52  
53  
54  
55  
56  
57  
58  
59  
60

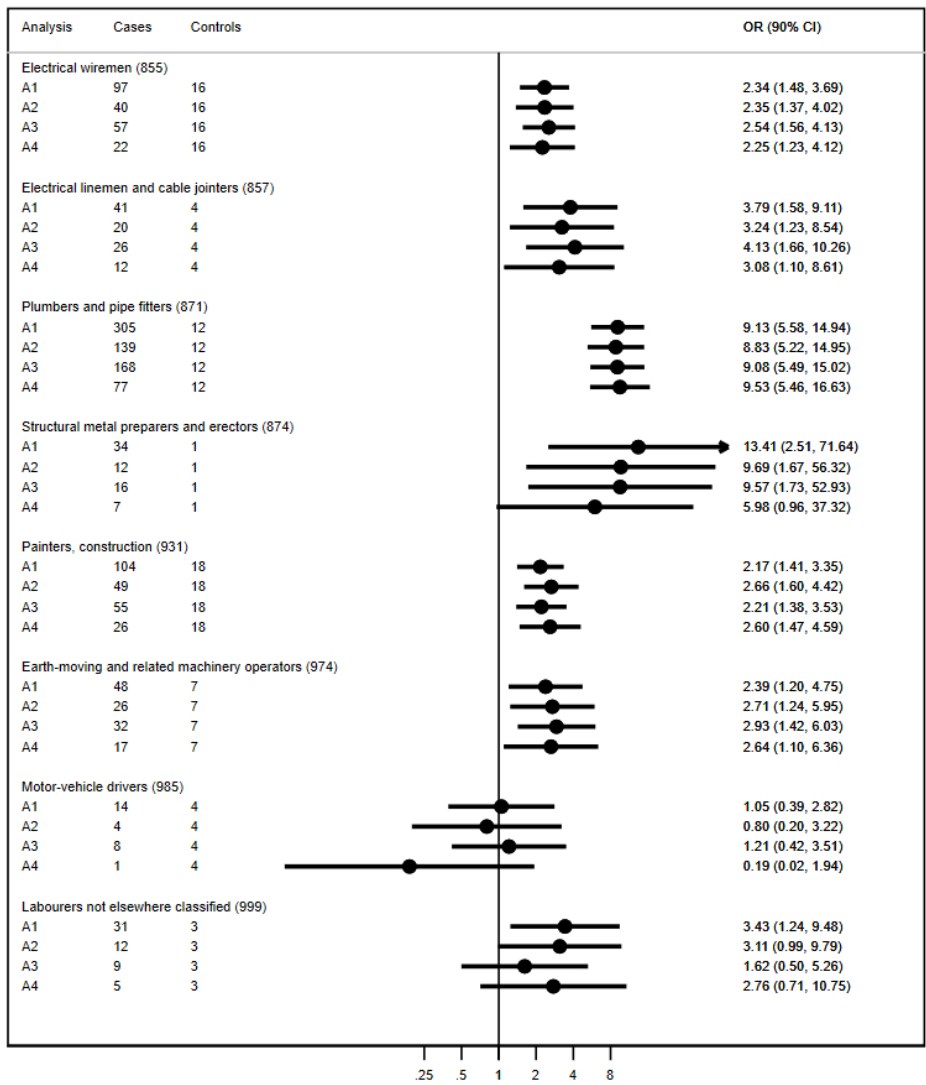

285x329mm (72 x 72 DPI)

**Supplementary Figure 1** Diagram showing numbers of male pleural mesothelioma cases and controls across the years and their main characteristics, Italy, 2002-2004 and 2012-2016. Cases selected from the **same periods** of controls (**analysis A2**). In the primary approach subjects ever employed in non-construction blue collar occupations for >5 years were excluded; in the secondary approach all subjects (also those ever employed in non-construction blue collar occupations for >5 years) were included.

| Period                        | Year | N. cases<br>Primary/<br>secondary<br>approach | Case source                                                                                                                                             | Control source                                                                                                                                                                           |
|-------------------------------|------|-----------------------------------------------|---------------------------------------------------------------------------------------------------------------------------------------------------------|------------------------------------------------------------------------------------------------------------------------------------------------------------------------------------------|
| 2002-2004<br>and<br>2012-2016 | 2002 | 214/760                                       | <b>NATIONAL<br/>MESOTHELIOMA<br/>REGISTRY</b><br>Living in any Region<br>ReNaM questionnaire<br><b>Primary/secondary<br/>approach:<br/>N. 2156/6910</b> | <b>EAGLE</b> Living in 216 municipalities in five Lombardy Provinces (Milan, Monza, Brescia, Pavia, Varese)<br>EAGLE questionnaire<br><b>Primary/secondary approach:<br/>N. 778/1617</b> |
|                               | 2003 | 238/758                                       |                                                                                                                                                         |                                                                                                                                                                                          |
|                               | 2004 | 246/768                                       |                                                                                                                                                         |                                                                                                                                                                                          |
|                               | 2012 | 288/886                                       |                                                                                                                                                         |                                                                                                                                                                                          |
|                               | 2013 | 304/979                                       |                                                                                                                                                         | <b>MISEM</b> Living in five Regions (Apulia, Lombardy, Piedmont, Tuscany, Veneto)<br>ReNaM questionnaire<br><b>Primary/secondary approach: N. 250/490</b>                                |
|                               | 2014 | 289/928                                       |                                                                                                                                                         |                                                                                                                                                                                          |
|                               | 2015 | 283/921                                       |                                                                                                                                                         |                                                                                                                                                                                          |
|                               | 2016 | 294/910                                       |                                                                                                                                                         |                                                                                                                                                                                          |

CARA, Cholangiocarcinoma Aetiology: Role of Asbestos; EAGLE, Environment And Genetics in Lung cancer Etiology; MISEM, Multicentre Italian Study on the Etiology of Mesothelioma; ReNaM, Registro Nazionale Mesoteliomi



**Supplementary Figure 2** Diagram showing numbers of male pleural mesothelioma cases and controls across the years and their main characteristics, Italy, 2000–2018. Cases selected from the **same areas** of controls (**analysis A3**). In the primary approach subjects ever employed in non-construction blue collar occupations for >5 years were excluded; in the secondary approach all subjects (also those ever employed in non-construction blue collar occupations for >5 years) were included.

| Period    | Year    | N. cases<br>Primary/<br>secondary<br>approach | Case source                                                                                                                                                                                                                                           | Control source |                                                                                                                                                                                                           |                                                                                                                                                                 |
|-----------|---------|-----------------------------------------------|-------------------------------------------------------------------------------------------------------------------------------------------------------------------------------------------------------------------------------------------------------|----------------|-----------------------------------------------------------------------------------------------------------------------------------------------------------------------------------------------------------|-----------------------------------------------------------------------------------------------------------------------------------------------------------------|
| 2000-2018 | 2000    | 134/389                                       | <b>LOMBARDY<br/>MESOTHELIOMA<br/>REGISTRY</b><br>Living in six Regions<br>(Lombardy, Piedmont,<br>Veneto, Tuscany, Apulia,<br>Emilia-Romagna)<br>ReNaM questionnaire<br><b>Primary/secondary<br/>           approach:<br/>           N. 2690/8933</b> |                |                                                                                                                                                                                                           |                                                                                                                                                                 |
|           | 2001    | 117/399                                       |                                                                                                                                                                                                                                                       |                |                                                                                                                                                                                                           |                                                                                                                                                                 |
|           | 2002    | 114/405                                       |                                                                                                                                                                                                                                                       |                | <b>EAGLE</b> Living in 216 municipalities in five<br>Lombardy Provinces<br>(Milan, Monza, Brescia, Pavia, Varese)<br>EAGLE questionnaire<br><b>Primary/secondary approach:<br/>           N. 778/1617</b> |                                                                                                                                                                 |
|           | 2003    | 142/444                                       |                                                                                                                                                                                                                                                       |                |                                                                                                                                                                                                           |                                                                                                                                                                 |
|           | 2004    | 134/443                                       |                                                                                                                                                                                                                                                       |                |                                                                                                                                                                                                           |                                                                                                                                                                 |
|           | 2005    | 135/481                                       |                                                                                                                                                                                                                                                       |                |                                                                                                                                                                                                           |                                                                                                                                                                 |
|           | 2006    | 125/419                                       |                                                                                                                                                                                                                                                       |                |                                                                                                                                                                                                           |                                                                                                                                                                 |
|           | 2007    | 121/471                                       |                                                                                                                                                                                                                                                       |                |                                                                                                                                                                                                           |                                                                                                                                                                 |
|           | 2008    | 129/469                                       |                                                                                                                                                                                                                                                       |                |                                                                                                                                                                                                           |                                                                                                                                                                 |
|           | 2009    | 156/507                                       |                                                                                                                                                                                                                                                       |                |                                                                                                                                                                                                           |                                                                                                                                                                 |
|           | 2010    | 142/482                                       |                                                                                                                                                                                                                                                       |                |                                                                                                                                                                                                           |                                                                                                                                                                 |
|           | 2011    | 156/540                                       |                                                                                                                                                                                                                                                       |                |                                                                                                                                                                                                           |                                                                                                                                                                 |
|           | 2012    | 176/532                                       |                                                                                                                                                                                                                                                       |                |                                                                                                                                                                                                           | <b>MISEM</b> Living in five Regions<br>(Apulia, Lombardy, Piedmont,<br>Tuscany, Veneto)<br>ReNaM questionnaire<br><b>Primary/secondary approach: N. 250/490</b> |
|           | 2013    | 176/604                                       |                                                                                                                                                                                                                                                       |                |                                                                                                                                                                                                           | <b>CARA</b> Living in one Region<br>(Emilia-Romagna)<br>ReNaM questionnaire<br><b>Primary/secondary approach: N. 57/103</b>                                     |
|           | 2014    | 146/505                                       |                                                                                                                                                                                                                                                       |                |                                                                                                                                                                                                           |                                                                                                                                                                 |
|           | 2015    | 161/526                                       |                                                                                                                                                                                                                                                       |                |                                                                                                                                                                                                           |                                                                                                                                                                 |
|           | 2016    | 188/592                                       |                                                                                                                                                                                                                                                       |                |                                                                                                                                                                                                           |                                                                                                                                                                 |
| 2017      | 179/536 |                                               |                                                                                                                                                                                                                                                       |                |                                                                                                                                                                                                           |                                                                                                                                                                 |
| 2018      | 59/189  |                                               |                                                                                                                                                                                                                                                       |                |                                                                                                                                                                                                           |                                                                                                                                                                 |

CARA, Cholangiocarcinoma Aetiology: Role of Asbestos; EAGLE, Environment And Genetics in Lung cancer Etiology; MISEM, Multicentre Italian Study on the Etiology of Mesothelioma; ReNaM, Registro Nazionale Mesoteliomi

**Supplementary Figure 3** Diagram showing numbers of male pleural mesothelioma cases and controls across the years and their main characteristics, Italy, 2002-2004 and 2012-2016. Cases selected from the **same periods and areas** of controls (**analysis A4**). In the primary approach subjects ever employed in non-construction blue collar occupations for >5 years were excluded; in the secondary approach all subjects (also those ever employed in non-construction blue collar occupations for >5 years) were included.

| Period                        | Year | N. cases<br>Primary/<br>secondary<br>approach | Case source                                                                                                                                                                                                                                           | Control source                                                                                                                                                                                                                                                                                     |
|-------------------------------|------|-----------------------------------------------|-------------------------------------------------------------------------------------------------------------------------------------------------------------------------------------------------------------------------------------------------------|----------------------------------------------------------------------------------------------------------------------------------------------------------------------------------------------------------------------------------------------------------------------------------------------------|
| 2002-2004<br>and<br>2012-2016 | 2002 | 114/405                                       | <b>NATIONAL<br/>MESOTHELIOMA<br/>REGISTRY</b><br>Living in six Regions<br>(Lombardy, Piedmont,<br>Veneto, Tuscany, Apulia,<br>Emilia-Romagna)<br>ReNaM questionnaire<br><b>Primary/secondary<br/>           approach:<br/>           N. 1237/4051</b> | <b>EAGLE</b> Living in 216 municipalities in five<br>Lombardy Provinces<br>(Milan, Monza, Brescia, Pavia, Varese)<br>EAGLE questionnaire<br><b>Primary/secondary approach:<br/>           N. 778/1617</b>                                                                                          |
|                               | 2003 | 142/444                                       |                                                                                                                                                                                                                                                       |                                                                                                                                                                                                                                                                                                    |
|                               | 2004 | 134/443                                       |                                                                                                                                                                                                                                                       |                                                                                                                                                                                                                                                                                                    |
|                               | 2012 | 176/532                                       |                                                                                                                                                                                                                                                       |                                                                                                                                                                                                                                                                                                    |
|                               | 2013 | 176/605                                       |                                                                                                                                                                                                                                                       | <b>MISEM</b> Living in five Regions<br>(Apulia, Lombardy, Piedmont,<br>Tuscany, Veneto)<br>ReNaM questionnaire<br><b>Primary/secondary approach: N. 250/490</b><br><br><b>CARA</b> Living in one Region<br>(Emilia-Romagna)<br>ReNaM questionnaire<br><b>Primary/secondary approach: N. 57/103</b> |
|                               | 2014 | 146/504                                       |                                                                                                                                                                                                                                                       |                                                                                                                                                                                                                                                                                                    |
|                               | 2015 | 161/526                                       |                                                                                                                                                                                                                                                       |                                                                                                                                                                                                                                                                                                    |
|                               | 2016 | 188/592                                       |                                                                                                                                                                                                                                                       |                                                                                                                                                                                                                                                                                                    |

CARA, Cholangiocarcinoma Aetiology: Role of Asbestos; EAGLE, Environment And Genetics in Lung cancer Etiology; MISEM, Multicentre Italian Study on the Etiology of Mesothelioma; ReNaM, Registro Nazionale Mesoteliomi

**Supplementary Table 1** Pleural mesothelioma odds ratios (OR) and 90% confidence intervals (CI) by **length of employment** for selected occupations in men in the construction industry (ISIC-71 code 5000), Italy, 2000–2018. Results of the **primary approach** (subjects ever employed in non-construction blue collar occupations for >5 years excluded), **analysis A1**

| Occupation (ISCO-68 code)                                    | Cases | Controls | OR <sup>a</sup> | 90% CI    |
|--------------------------------------------------------------|-------|----------|-----------------|-----------|
| Never employed in construction                               | 2616  | 878      | 1.00            | Reference |
| Length of employment (years)                                 |       |          |                 |           |
| Bricklayers, stonemasons and other construction workers (95) |       |          |                 |           |
| 0.5-19                                                       | 370   | 33       | 3.98            | 2.92-5.43 |
| 20+                                                          | 971   | 45       | 7.11            | 5.47-9.24 |
| <i>P</i> -value for trend                                    |       |          | <0.001          |           |
| <i>P</i> -value for trend, reference category excluded       |       |          | 0.02            |           |
| Bricklayers, stonemasons and tile setters (951)              |       |          |                 |           |
| 0.5-19                                                       | 246   | 14       | 6.72            | 4.24-10.7 |
| 20+                                                          | 788   | 34       | 7.61            | 5.64-10.3 |
| <i>P</i> -value for trend                                    |       |          | <0.001          |           |
| <i>P</i> -value for trend, reference category excluded       |       |          | 0.79            |           |
| Bricklayers (95120)                                          |       |          |                 |           |
| 0.5-19                                                       | 233   | 14       | 6.27            | 3.95-9.96 |
| 20+                                                          | 735   | 29       | 8.25            | 5.98-11.4 |
| <i>P</i> -value for trend                                    |       |          | <0.001          |           |
| <i>P</i> -value for trend, reference category excluded       |       |          | 0.44            |           |
| Construction workers not elsewhere classified (959)          |       |          |                 |           |
| 0.5-19                                                       | 224   | 16       | 4.48            | 2.90-6.93 |
| 20+                                                          | 90    | 6        | 4.78            | 2.36-9.68 |
| <i>P</i> -value for trend                                    |       |          | <0.001          |           |
| <i>P</i> -value for trend, reference category excluded       |       |          | 0.59            |           |
| Electrical wiremen (855)                                     |       |          |                 |           |
| 0.5-19                                                       | 42    | 7        | 2.39            | 1.20-4.75 |
| 20+                                                          | 55    | 9        | 2.30            | 1.25-4.21 |
| <i>P</i> -value for trend                                    |       |          | 0.004           |           |
| <i>P</i> -value for trend, reference category excluded       |       |          | 0.61            |           |
| Plumbers and pipe fitters (871)                              |       |          |                 |           |
| 0.5-19                                                       | 90    | 6        | 5.48            | 2.71-11.1 |
| 20+                                                          | 213   | 6        | 12.56           | 6.31-25.0 |
| <i>P</i> -value for trend                                    |       |          | <0.001          |           |
| <i>P</i> -value for trend, reference category excluded       |       |          | 0.20            |           |
| Painters (931)                                               |       |          |                 |           |
| 0.5-19                                                       | 37    | 7        | 2.33            | 1.16-4.67 |
| 20+                                                          | 64    | 10       | 2.11            | 1.18-3.76 |
| <i>P</i> -value for trend                                    |       |          | 0.007           |           |
| <i>P</i> -value for trend, reference category excluded       |       |          | 0.65            |           |

ISCO, International Standard Classification of Occupations (1968); ISIC, International Standard Industry Classification (1971)

<sup>a</sup>OR calculated with unconditional logistic regression models adjusted for age (categorical) and period

**Supplementary Table 2** Pleural mesothelioma odds ratios (OR) and 90% confidence intervals (CI) for selected occupations in men in the construction industry (ISIC-71 code 5000), Italy, 2000–2018. Results of the **secondary approach** (all subjects included, also those ever employed in non-construction blue collar occupations for >5 years), **analysis A1**

| Occupation (ISCO-68 code)                                          | Cases  | Controls | OR*  | 90% CI    |
|--------------------------------------------------------------------|--------|----------|------|-----------|
| Total                                                              | 15 592 | 2210     |      |           |
| Never employed in construction                                     | 10 863 | 1808     | 1.00 | Reference |
| Ever employed in construction                                      | 4729   | 402      | 2.00 | 1.82-2.21 |
| Blue collars (55, 56, 581, 628, 631, 7-9)                          | 4506   | 342      | 2.24 | 2.02-2.48 |
| Bricklayers, carpenters, and other construction workers (95)       | 2877   | 183      | 2.60 | 2.28-2.98 |
| Bricklayers, stonemasons and tile setters (951)                    | 1921   | 127      | 2.48 | 2.12-2.91 |
| Bricklayers (95120)                                                | 1778   | 118      | 2.44 | 2.07-2.87 |
| Reinforced concreters, cement finishers and terrazzo workers (952) | 35     | 0        | NC   |           |
| Roofers (953)                                                      | 66     | 3        | 4.55 | 1.71-12.1 |
| Carpenters, joiners and parquetry workers (954)                    | 161    | 9        | 3.19 | 1.80-5.65 |
| Plasterers (955)                                                   | 20     | 2        | 1.66 | 0.48-5.81 |
| Insulators (956)                                                   | 122    | 4        | 6.16 | 2.66-14.3 |
| Glaziers (957)                                                     | 1      | 12       | NC   |           |
| Construction workers NEC (959)                                     | 873    | 39       | 3.49 | 2.65-4.60 |
| Other blue collar occupations                                      |        |          |      |           |
| Electrical wiremen (855)                                           | 298    | 40       | 1.38 | 1.03-1.83 |
| Electrical linemen and cable jointers (857)                        | 119    | 8        | 2.64 | 1.44-4.85 |
| Plumbers and pipe fitters (871)                                    | 608    | 31       | 3.54 | 2.60-4.82 |
| Welders and flame-cutters (872)                                    | 18     | 0        | NC   |           |
| Sheet-metal workers (873)                                          | 33     | 1        | 7.06 | 1.32-37.8 |
| Structural metal preparers and erectors (874)                      | 121    | 3        | 7.37 | 2.81-19.4 |
| Painters, construction (931)                                       | 241    | 33       | 1.25 | 0.91-1.71 |
| Crane and hoist operators (973)                                    | 49     | 4        | 2.39 | 1.01-5.67 |
| Earth-moving and related machinery operators (974)                 | 100    | 23       | 0.69 | 0.47-1.03 |
| Motor-vehicle drivers (985)                                        | 70     | 11       | 1.08 | 0.63-1.88 |
| Labourers NEC (999)                                                | 101    | 5        | 3.21 | 1.50-6.88 |

ISCO, International Standard Classification of Occupations (1968); ISIC, International Standard Industry Classification (1971); NC, not calculable; NEC, not elsewhere classified.

\*OR calculated with unconditional logistic regression models adjusted for age (categorical) and period.

**Supplementary Figure 4** Pleural mesothelioma odds ratios (OR) and 90% confidence intervals (CI) for selected occupations in men in the construction industry (ISIC-71 code 5000) in four analyses, Italy, 2000–2018. Results of the **secondary approach** (all subjects included, also those ever employed in non-construction blue collar occupations for >5 years): ever employed in construction, blue collars, and three-digits ISCO-68 unit groups within minor group 95 “Bricklayers, carpenters and other construction workers”. A1: overall analysis using all Italian cases, 2000-2018; A2: analysis with cases selected from the same periods of controls; A3: analysis with cases selected from the same areas of controls; A4: analysis with cases selected from the same periods and areas of controls. In parentheses the International Standard Classification of Occupations (ISCO, 1968) codes.

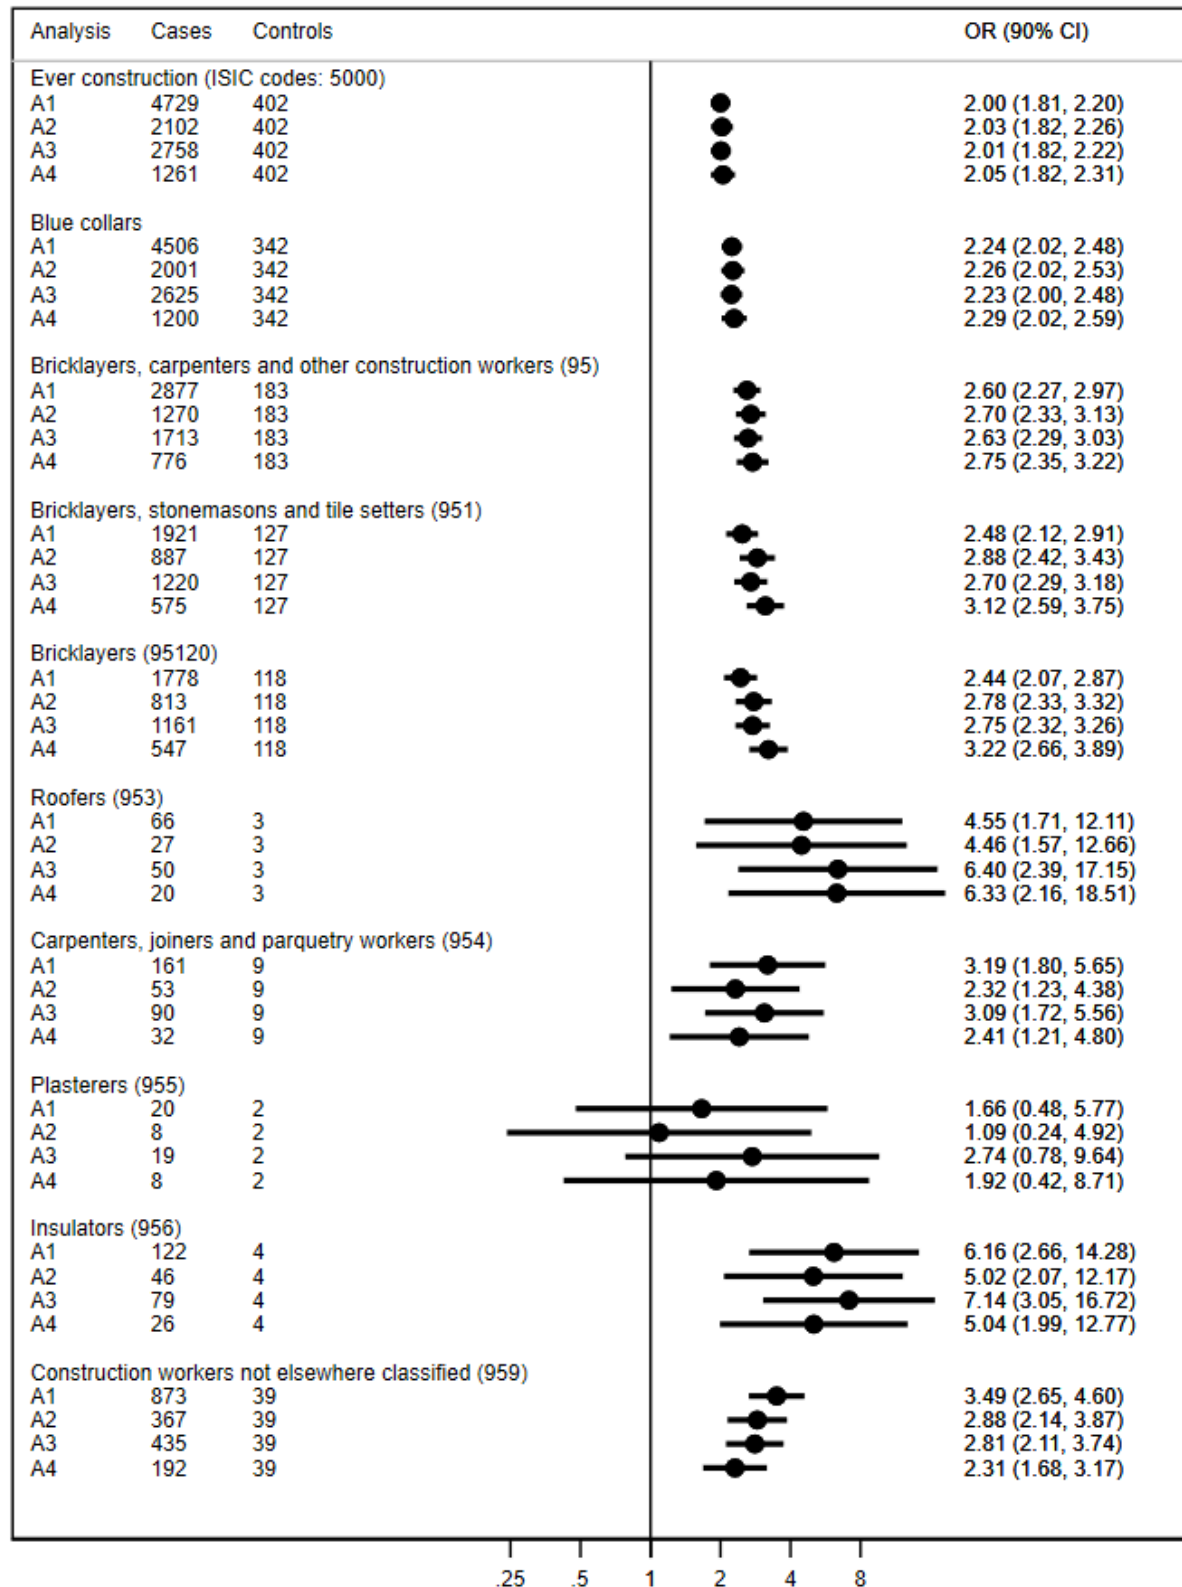

**Supplementary Figure 5** Pleural mesothelioma odds ratios (OR) and 90% confidence intervals (CI) for selected occupations in men in the construction industry (ISIC-71 code 5000) in four analyses, Italy, 2000–2018. Results of the **secondary approach** (all subjects included, also those ever employed in non-construction blue collar occupations for >5 years): other three-digit ISCO-68 unit groups. A1: overall analysis using all Italian cases, 2000-2018; A2: analysis with cases selected from the same periods of controls; A3: analysis with cases selected from the same areas of controls; A4: analysis with cases selected from the same periods and areas of controls. In parentheses the International Standard Classification of Occupations (ISCO, 1968) codes.

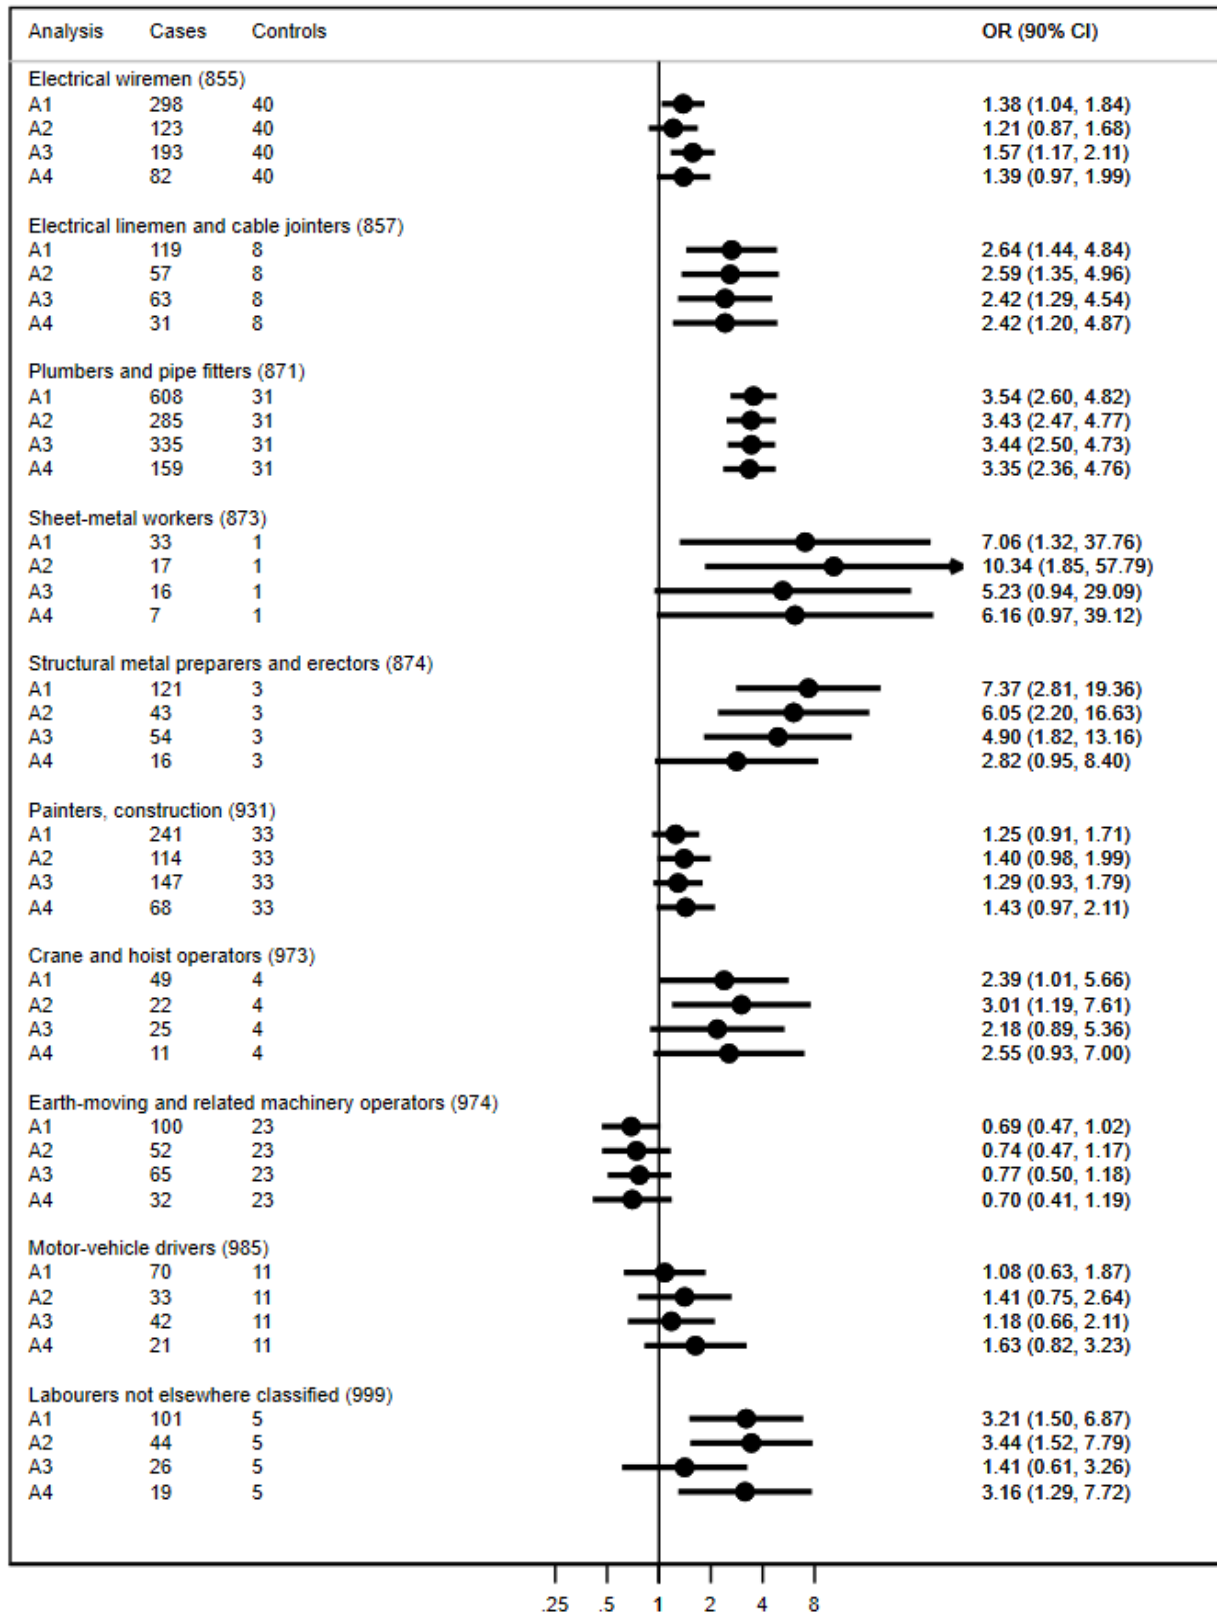

STROBE Statement—Checklist of items that should be included in reports of *case-control studies*

|                              | Item No | Recommendation                                                                                                                                                                                    | Comment                                                      |
|------------------------------|---------|---------------------------------------------------------------------------------------------------------------------------------------------------------------------------------------------------|--------------------------------------------------------------|
| <b>Title and abstract</b>    | 1       | (a) Indicate the study's design with a commonly used term in the title or the abstract                                                                                                            | Pag.1                                                        |
|                              |         | (b) Provide in the abstract an informative and balanced summary of what was done and what was found                                                                                               | Pag.3                                                        |
| <b>Introduction</b>          |         |                                                                                                                                                                                                   |                                                              |
| Background/rationale         | 2       | Explain the scientific background and rationale for the investigation being reported                                                                                                              | Pag.5-6                                                      |
| Objectives                   | 3       | State specific objectives, including any prespecified hypotheses                                                                                                                                  | Pag.6                                                        |
| <b>Methods</b>               |         |                                                                                                                                                                                                   |                                                              |
| Study design                 | 4       | Present key elements of study design early in the paper                                                                                                                                           | Pag.6-8                                                      |
| Setting                      | 5       | Describe the setting, locations, and relevant dates, including periods of recruitment, exposure, follow-up, and data collection                                                                   | Pag.6-8                                                      |
| Participants                 | 6       | (a) Give the eligibility criteria, and the sources and methods of case ascertainment and control selection. Give the rationale for the choice of cases and controls                               | Pag.6-8                                                      |
|                              |         | (b) For matched studies, give matching criteria and the number of controls per case                                                                                                               | Not applicable                                               |
| Variables                    | 7       | Clearly define all outcomes, exposures, predictors, potential confounders, and effect modifiers. Give diagnostic criteria, if applicable                                                          | Pag.6-9                                                      |
| Data sources/<br>measurement | 8*      | For each variable of interest, give sources of data and details of methods of assessment (measurement). Describe comparability of assessment methods if there is more than one group              | Pag.6-9                                                      |
| Bias                         | 9       | Describe any efforts to address potential sources of bias                                                                                                                                         | Pag.8-9                                                      |
| Study size                   | 10      | Explain how the study size was arrived at                                                                                                                                                         | Pag.6-7                                                      |
| Quantitative variables       | 11      | Explain how quantitative variables were handled in the analyses. If applicable, describe which groupings were chosen and why                                                                      | Pag.8                                                        |
| Statistical methods          | 12      | (a) Describe all statistical methods, including those used to control for confounding                                                                                                             | Pag.8-9                                                      |
|                              |         | (b) Describe any methods used to examine subgroups and interactions                                                                                                                               | Pag.8-9                                                      |
|                              |         | (c) Explain how missing data were addressed                                                                                                                                                       | Pag.11                                                       |
|                              |         | (d) If applicable, explain how matching of cases and controls was addressed                                                                                                                       | Not applicable.                                              |
|                              |         | (e) Describe any sensitivity analyses                                                                                                                                                             | Pag.8-9                                                      |
| <b>Results</b>               |         |                                                                                                                                                                                                   |                                                              |
| Participants                 | 13*     | (a) Report numbers of individuals at each stage of study—eg numbers potentially eligible, examined for eligibility, confirmed eligible, included in the study, completing follow-up, and analysed | Pag.8-9,<br>Figure 1,<br>Suppl. Figures<br>1-3               |
|                              |         | (b) Give reasons for non-participation at each stage                                                                                                                                              | Participation<br>been reported<br>in the original<br>studies |

|                          |     |                                                                                                                                                                                                              |                                                                                       |
|--------------------------|-----|--------------------------------------------------------------------------------------------------------------------------------------------------------------------------------------------------------------|---------------------------------------------------------------------------------------|
|                          |     | (c) Consider use of a flow diagram                                                                                                                                                                           | Figure 1,<br>Suppl. Figures<br>1-3                                                    |
| Descriptive data         | 14* | (a) Give characteristics of study participants (eg demographic, clinical, social) and information on exposures and potential confounders                                                                     | Pag.9-10,<br>Table 1                                                                  |
|                          |     | (b) Indicate number of participants with missing data for each variable of interest                                                                                                                          | Pag.10 (Table<br>1)                                                                   |
| Outcome data             | 15* | Report numbers in each exposure category, or summary measures of exposure                                                                                                                                    | Pag.2 (Table<br>2) and Suppl.<br>Table 2                                              |
| Main results             | 16  | (a) Give unadjusted estimates and, if applicable, confounder-adjusted estimates and their precision (eg, 95% confidence interval). Make clear which confounders were adjusted for and why they were included | Since previous<br>studies were<br>matched,<br>crude analysis<br>is not<br>appropriate |
|                          |     | (b) Report category boundaries when continuous variables were categorized                                                                                                                                    | Pag.10 (Table<br>1), and Suppl.<br>Table 1                                            |
|                          |     | (c) If relevant, consider translating estimates of relative risk into absolute risk for a meaningful time period                                                                                             | Not applicable                                                                        |
| Other analyses           | 17  | Report other analyses done—eg analyses of subgroups and interactions, and sensitivity analyses                                                                                                               | Pag.10-11                                                                             |
| <b>Discussion</b>        |     |                                                                                                                                                                                                              |                                                                                       |
| Key results              | 18  | Summarise key results with reference to study objectives                                                                                                                                                     | Pag.12                                                                                |
| Limitations              | 19  | Discuss limitations of the study, taking into account sources of potential bias or imprecision. Discuss both direction and magnitude of any potential bias                                                   | Pag.13-14                                                                             |
| Interpretation           | 20  | Give a cautious overall interpretation of results considering objectives, limitations, multiplicity of analyses, results from similar studies, and other relevant evidence                                   | Pag.12-14                                                                             |
| Generalisability         | 21  | Discuss the generalisability (external validity) of the study results                                                                                                                                        | Pag.12                                                                                |
| <b>Other information</b> |     |                                                                                                                                                                                                              |                                                                                       |
| Funding                  | 22  | Give the source of funding and the role of the funders for the present study and, if applicable, for the original study on which the present article is based                                                | Pag.15                                                                                |

\*Give information separately for cases and controls.

**Note:** An Explanation and Elaboration article discusses each checklist item and gives methodological background and published examples of transparent reporting. The STROBE checklist is best used in conjunction with this article (freely available on the Web sites of PLoS Medicine at <http://www.plosmedicine.org/>, Annals of Internal Medicine at <http://www.annals.org/>, and Epidemiology at <http://www.epidem.com/>). Information on the STROBE Initiative is available at <http://www.strobe-statement.org>.



# BMJ Open

## Pleural mesothelioma risk in the construction industry: a case-control study in Italy. 2000-2018

|                               |                                                                                                                                                                                                                                                                                                                                                                                                                                                                                                                                                                                                                                                                                                                                                                                                                                                                                                                                                                                                                                                                                                                                                                                                                                                                                                                                                                                                                                                                                                                                                                                                                                                                                                                                                                                                                                                                                                                                                                                                                                                                                                                                                                                                                                                 |
|-------------------------------|-------------------------------------------------------------------------------------------------------------------------------------------------------------------------------------------------------------------------------------------------------------------------------------------------------------------------------------------------------------------------------------------------------------------------------------------------------------------------------------------------------------------------------------------------------------------------------------------------------------------------------------------------------------------------------------------------------------------------------------------------------------------------------------------------------------------------------------------------------------------------------------------------------------------------------------------------------------------------------------------------------------------------------------------------------------------------------------------------------------------------------------------------------------------------------------------------------------------------------------------------------------------------------------------------------------------------------------------------------------------------------------------------------------------------------------------------------------------------------------------------------------------------------------------------------------------------------------------------------------------------------------------------------------------------------------------------------------------------------------------------------------------------------------------------------------------------------------------------------------------------------------------------------------------------------------------------------------------------------------------------------------------------------------------------------------------------------------------------------------------------------------------------------------------------------------------------------------------------------------------------|
| Journal:                      | <i>BMJ Open</i>                                                                                                                                                                                                                                                                                                                                                                                                                                                                                                                                                                                                                                                                                                                                                                                                                                                                                                                                                                                                                                                                                                                                                                                                                                                                                                                                                                                                                                                                                                                                                                                                                                                                                                                                                                                                                                                                                                                                                                                                                                                                                                                                                                                                                                 |
| Manuscript ID                 | bmjopen-2023-073480.R2                                                                                                                                                                                                                                                                                                                                                                                                                                                                                                                                                                                                                                                                                                                                                                                                                                                                                                                                                                                                                                                                                                                                                                                                                                                                                                                                                                                                                                                                                                                                                                                                                                                                                                                                                                                                                                                                                                                                                                                                                                                                                                                                                                                                                          |
| Article Type:                 | Original research                                                                                                                                                                                                                                                                                                                                                                                                                                                                                                                                                                                                                                                                                                                                                                                                                                                                                                                                                                                                                                                                                                                                                                                                                                                                                                                                                                                                                                                                                                                                                                                                                                                                                                                                                                                                                                                                                                                                                                                                                                                                                                                                                                                                                               |
| Date Submitted by the Author: | 06-Jul-2023                                                                                                                                                                                                                                                                                                                                                                                                                                                                                                                                                                                                                                                                                                                                                                                                                                                                                                                                                                                                                                                                                                                                                                                                                                                                                                                                                                                                                                                                                                                                                                                                                                                                                                                                                                                                                                                                                                                                                                                                                                                                                                                                                                                                                                     |
| Complete List of Authors:     | <p>Stella, Simona; Fondazione IRCCS Ca' Granda Ospedale Maggiore Policlinico, Occupational Health Unit, Regional Operating Center of Lombardy (COR Lombardia)</p> <p>Consonni, Dario; Fondazione IRCCS Ca' Granda Ospedale Maggiore Policlinico, Occupational Health Unit, Regional Operating Center of Lombardy (COR Lombardia)</p> <p>Migliore, Enrica; University of Turin, COR Piemonte, Cancer Epidemiology Unit</p> <p>Stura, Antonella; CPO and University of Turin, COR Piemonte, Cancer Epidemiology Unit</p> <p>Cavone, Domenica; University of Bari Aldo Moro, COR Puglia, Section of Occupational Medicine "B. Ramazzini", Department of Interdisciplinary Medicine</p> <p>Vimercati, Luigi; University of Bari Aldo Moro, COR Puglia, Section of Occupational Medicine "B. Ramazzini", Department of Interdisciplinary Medicine</p> <p>Miligi, Lucia; Institute for Cancer Research, Prevention and Clinical Network, COR Toscana, Unit of Environmental and Occupational Epidemiology</p> <p>Piro, Sara; Institute for Cancer Research, Prevention and Clinical Network, COR Toscana, Unit of Environmental and Occupational Epidemiology</p> <p>Landi, Maria Teresa; National Cancer Institute, Division of Cancer Epidemiology and Genetics</p> <p>Caporaso, Neil E. ; National Cancer Institute, Division of Cancer Epidemiology and Genetics</p> <p>Curti, Stefania; University of Bologna, Department of Medical and Surgical Sciences</p> <p>mattioli, stefano; University of Ferrara, Department of Environmental and Prevention Sciences</p> <p>Brandi, Giovanni; University of Bologna, Department of Medical and Surgical Sciences; IRCCS Azienda Ospedaliero-Universitaria di Bologna, Oncology Unit</p> <p>Gioscia, Carmela; Valle d'Aosta Health Local Unit, COR Valle d'Aosta</p> <p>Eccher, Silvia; Provincial Unit of Health, Hygiene and Occupational Medicine, COR Province of Trento</p> <p>Murano, Stefano; Alto Adige Health Local Unit, COR Province of Bolzano</p> <p>Casotto, Veronica; Azienda Zero, COR Veneto, Epidemiological Department</p> <p>Comiati, Vera; Azienda Zero, COR Veneto, Epidemiological Department</p> <p>Negro, Corrado; University of Trieste - Trieste General Hospitals, COR</p> |

|                                    |                                                                                                                                                                                                                                                                                                                                                                                                                                                                                                                                                                                                                                                                                                                                                                                                                                                                                                                                                                                                                                                                                                                                                                                                                                                                                                                                                                                                                                                                                                                                                                                                                                                                                                                                                                                                                                                                                                                                                                                                                                                                          |
|------------------------------------|--------------------------------------------------------------------------------------------------------------------------------------------------------------------------------------------------------------------------------------------------------------------------------------------------------------------------------------------------------------------------------------------------------------------------------------------------------------------------------------------------------------------------------------------------------------------------------------------------------------------------------------------------------------------------------------------------------------------------------------------------------------------------------------------------------------------------------------------------------------------------------------------------------------------------------------------------------------------------------------------------------------------------------------------------------------------------------------------------------------------------------------------------------------------------------------------------------------------------------------------------------------------------------------------------------------------------------------------------------------------------------------------------------------------------------------------------------------------------------------------------------------------------------------------------------------------------------------------------------------------------------------------------------------------------------------------------------------------------------------------------------------------------------------------------------------------------------------------------------------------------------------------------------------------------------------------------------------------------------------------------------------------------------------------------------------------------|
|                                    | <p>Friuli-Venezia Giulia, Clinical Unit of Occupational Medicine<br/> D'Agostin, Flavia; University of Trieste - Trieste General Hospitals, COR<br/> Friuli-Venezia Giulia, Clinical Unit of Occupational Medicine<br/> Genova, Carlo; IRCCS Ospedale Policlinico San Martino, UO Clinica di<br/> Oncologia Medica; Università degli Studi di Genova, Dipartimento di<br/> Medicina Interna e Specialità Mediche<br/> Benfatto, Lucia; IRCCS Ospedale Policlinico San Martino, COR Liguria, UO<br/> Epidemiologia Clinica<br/> Romanelli, Antonio; Health Local Unit, COR Emilia-Romagna, Public<br/> Health Department<br/> Grappasonni, Iolanda; University of Camerino, COR Marche, School of<br/> Medicinal and Health Products Sciences<br/> Madeo, Gabriella; Regione Umbria, COR Umbria, Servizio Prevenzione,<br/> Sanità Veterinaria e Sicurezza Alimentare<br/> Cozzi, Ilaria; Lazio Regional Health Service, ASL Roma 1, COR Lazio,<br/> Department of Epidemiology<br/> Romeo, Elisa; Lazio Regional Health Service, ASL Roma 1, COR Lazio,<br/> Department of Epidemiology<br/> Tommaso, Staniscia ; Abruzzo Regional Health Agency (ASR), COR<br/> Abruzzo<br/> Carrozza, Francesco; Registri Tumori Regione Molise, COR Molise<br/> Labianca, Michele; Epidemiologic Regional Center, COR Basilicata<br/> Tallarigo, Federico; Public Health Unit, COR Calabria<br/> Cascone, Giuseppe; Cancer Registry ASP Ragusa and Sicily Regional<br/> Epidemiological Observatory, COR Sicilia<br/> Melis, Massimo; Regional Epidemiological Center, COR Sardegna<br/> Marinaccio, Alessandro; Italian Workers' Compensation Authority<br/> (INAIL), Occupational and Environmental Medicine, Epidemiology and<br/> Hygiene Department<br/> Binazzi, Alessandra; Italian Workers' Compensation Authority (INAIL),<br/> Occupational and Environmental Medicine, Epidemiology and Hygiene<br/> Department<br/> Mensi, Carolina; Fondazione IRCCS Ca' Granda Ospedale Maggiore<br/> Policlinico, Epidemiology Unit<br/> ReNaM, Working Group; ReNaM Working Group</p> |
| <b>Primary Subject<br>Heading</b>: | Occupational and environmental medicine                                                                                                                                                                                                                                                                                                                                                                                                                                                                                                                                                                                                                                                                                                                                                                                                                                                                                                                                                                                                                                                                                                                                                                                                                                                                                                                                                                                                                                                                                                                                                                                                                                                                                                                                                                                                                                                                                                                                                                                                                                  |
| Secondary Subject Heading:         | Epidemiology                                                                                                                                                                                                                                                                                                                                                                                                                                                                                                                                                                                                                                                                                                                                                                                                                                                                                                                                                                                                                                                                                                                                                                                                                                                                                                                                                                                                                                                                                                                                                                                                                                                                                                                                                                                                                                                                                                                                                                                                                                                             |
| Keywords:                          | Case-Control Studies, EPIDEMIOLOGY, OCCUPATIONAL & INDUSTRIAL<br>MEDICINE, Respiratory tract tumours < ONCOLOGY, PUBLIC HEALTH                                                                                                                                                                                                                                                                                                                                                                                                                                                                                                                                                                                                                                                                                                                                                                                                                                                                                                                                                                                                                                                                                                                                                                                                                                                                                                                                                                                                                                                                                                                                                                                                                                                                                                                                                                                                                                                                                                                                           |
|                                    |                                                                                                                                                                                                                                                                                                                                                                                                                                                                                                                                                                                                                                                                                                                                                                                                                                                                                                                                                                                                                                                                                                                                                                                                                                                                                                                                                                                                                                                                                                                                                                                                                                                                                                                                                                                                                                                                                                                                                                                                                                                                          |

SCHOLARONE™  
Manuscripts



I, the Submitting Author has the right to grant and does grant on behalf of all authors of the Work (as defined in the below author licence), an exclusive licence and/or a non-exclusive licence for contributions from authors who are: i) UK Crown employees; ii) where BMJ has agreed a CC-BY licence shall apply, and/or iii) in accordance with the terms applicable for US Federal Government officers or employees acting as part of their official duties; on a worldwide, perpetual, irrevocable, royalty-free basis to BMJ Publishing Group Ltd ("BMJ") its licensees and where the relevant Journal is co-owned by BMJ to the co-owners of the Journal, to publish the Work in this journal and any other BMJ products and to exploit all rights, as set out in our [licence](#).

The Submitting Author accepts and understands that any supply made under these terms is made by BMJ to the Submitting Author unless you are acting as an employee on behalf of your employer or a postgraduate student of an affiliated institution which is paying any applicable article publishing charge ("APC") for Open Access articles. Where the Submitting Author wishes to make the Work available on an Open Access basis (and intends to pay the relevant APC), the terms of reuse of such Open Access shall be governed by a Creative Commons licence – details of these licences and which [Creative Commons](#) licence will apply to this Work are set out in our licence referred to above.

Other than as permitted in any relevant BMJ Author's Self Archiving Policies, I confirm this Work has not been accepted for publication elsewhere, is not being considered for publication elsewhere and does not duplicate material already published. I confirm all authors consent to publication of this Work and authorise the granting of this licence.

**Pleural mesothelioma risk in the construction industry: a case-control study in Italy, 2000-2018**

1  
2  
3  
4 Simona Stella,<sup>1\*</sup> Dario Consonni,<sup>1\*</sup> Enrica Migliore,<sup>2</sup> Antonella Stura,<sup>2</sup> Domenica Cavone,<sup>3</sup> Luigi Vimercati,<sup>3</sup>  
5 Lucia Miligi,<sup>4</sup> Sara Piro,<sup>4</sup> Maria Teresa Landi,<sup>5</sup> Neil E Caporaso,<sup>5</sup> Stefania Curti,<sup>6</sup> Stefano Mattioli,<sup>7</sup> Giovanni  
6 Brandi,<sup>6,8</sup> Carmela Gioscia,<sup>9</sup> Silvia Eccher,<sup>10</sup> Stefano Murano,<sup>11</sup> Veronica Casotto,<sup>12</sup> Vera Comiati,<sup>12</sup> Corrado  
7 Negro,<sup>13</sup> Flavia D'Agostin,<sup>13</sup> Carlo Genova,<sup>14,15</sup> Lucia Benfatto,<sup>16</sup> Antonio Romanelli,<sup>17</sup> Iolanda  
8 Grappasonni,<sup>18</sup> Gabriella Madeo,<sup>19</sup> Ilaria Cozzi,<sup>20</sup> Elisa Romeo,<sup>20</sup> Tommaso Staniscia,<sup>21</sup> Francesco Carrozza,<sup>22</sup>  
9 Michele Labianca,<sup>23</sup> Federico Tallarigo,<sup>24</sup> Giuseppe Cascone,<sup>25</sup> Massimo Melis,<sup>26</sup> Alessandro Marinaccio,<sup>27</sup>  
10 Alessandra Binazzi,<sup>27</sup> Carolina Mensi,<sup>1</sup> RenaM Working Group\*\*

11  
12  
13  
14  
15  
16  
17 \*Contributed equally to this work

18  
19 <sup>1</sup>Occupational Health Unit, Regional Operating Center of Lombardy (COR Lombardia), Fondazione IRCCS  
20 Ca' Granda Ospedale Maggiore Policlinico, Milan, Italy

21  
22 <sup>2</sup>COR Piemonte, Cancer Epidemiology Unit, CPO and University of Turin, Italy

23  
24 <sup>3</sup>COR Puglia, Section of Occupational Medicine "B. Ramazzini", Department of Interdisciplinary Medicine,  
25 University of Bari Aldo Moro, Bari, Italy

26  
27 <sup>4</sup>COR Toscana, Institute for Cancer Research, Prevention and Clinical Network, Unit of Environmental and  
28 Occupational Epidemiology, Firenze, Italy

29  
30 <sup>5</sup>Division of Cancer Epidemiology and Genetics, National Cancer Institute, Bethesda, MD, USA

31  
32 <sup>6</sup>Department of Medical and Surgical Sciences, University of Bologna, Italy

33  
34 <sup>7</sup>Department of Environmental and Prevention Sciences, University of Ferrara, Italy

35  
36 <sup>8</sup>Oncology Unit, IRCCS Azienda Ospedaliero-Universitaria di Bologna, Italy

37  
38 <sup>9</sup>COR Valle d'Aosta, Valle d'Aosta Health Local Unit, Aosta, Italy

39  
40 <sup>10</sup>COR Province of Trento, Provincial Unit of Health, Hygiene and Occupational Medicine, Trento, Italy

41  
42 <sup>11</sup>COR Province of Bolzano, Alto Adige Health Local Unit, Bolzano, Italy

43  
44 <sup>12</sup>COR Veneto, Epidemiological Department, Azienda Zero, Veneto Region, Italy

45  
46 <sup>13</sup>COR Friuli-Venezia Giulia, University of Trieste - Trieste General Hospitals, Clinical Unit of Occupational  
47 Medicine, Trieste, Italy

48  
49 <sup>14</sup>UO Clinica di Oncologia Medica, IRCCS Ospedale Policlinico San Martino, Genova, Italy

50  
51 <sup>15</sup>Dipartimento di Medicina Interna e Specialità Mediche, Università degli Studi di Genova. Italy

52  
53 <sup>16</sup>COR Liguria, UO Epidemiologia Clinica, IRCCS Ospedale Policlinico San Martino, Genova, Italy

54  
55 <sup>17</sup>COR Emilia-Romagna, Health Local Unit, Public Health Department, Reggio Emilia, Italy

56  
57 <sup>18</sup>COR Marche, University of Camerino, School of Medicinal and Health Products Sciences, Camerino, Italy

58  
59 <sup>19</sup>COR Umbria, Servizio Prevenzione, Sanità Veterinaria e Sicurezza Alimentare - Regione Umbria, Perugia,  
60 Italy

<sup>20</sup>COR Lazio, Department of Epidemiology, Lazio Regional Health Service, ASL Roma 1, Rome, Italy

1 <sup>21</sup>COR Abruzzo, Abruzzo Regional Health Agency (ASR), Pescara, Italy

2 <sup>22</sup>COR Molise, Registri Tumori Regione Molise, Campobasso, Italy

3 <sup>23</sup>COR Basilicata, Epidemiologic Regional Center, Potenza, Italy

4 <sup>24</sup>COR Calabria, Public Health Unit, Crotone, Italy

5 <sup>25</sup>COR Sicilia, Cancer Registry ASP Ragusa and Sicily Regional Epidemiological Observatory, Italy

6 <sup>26</sup>COR Sardegna. Regional Epidemiological Center, Cagliari, Italy

7 <sup>27</sup>Occupational and Environmental Medicine, Epidemiology and Hygiene Department, Italian Workers'  
8 Compensation Authority (INAIL), Rome, Italy

9  
10  
11  
12  
13  
14  
15  
16 **\*\*ReNaM Working Group members:**

17 Di Marzio D<sup>27</sup> (ReNaM);

18 Richiardi L,<sup>2</sup> Gangemi M,<sup>2</sup> Brentisci C,<sup>2</sup> Gilardetti M,<sup>2</sup> Mirabelli D<sup>2</sup> (COR Piemonte);

19 Bonzini M,<sup>1</sup> Dallari B,<sup>1</sup> Pesatori AC,<sup>1</sup> Rugarli S<sup>1</sup> (COR Lombardia);

20 Fedeli U<sup>12</sup> (COR Veneto);

21 De Michieli P<sup>13</sup> (COR Friuli-Venezia Giulia);

22 Mangone L,<sup>17</sup> Storchi C,<sup>17</sup> Sala O<sup>17</sup> (COR Emilia-Romagna);

23 Cacciarini V,<sup>4</sup> Giovannetti L,<sup>4</sup> Martini A,<sup>4</sup> Elisabetta Chellini<sup>4</sup> (COR Toscana);

24 Pascucci C<sup>18</sup> (COR Marche);

25 Michelozzi P,<sup>20</sup> Davoli M,<sup>20</sup> Ancona L<sup>20</sup>, Balestri A<sup>20</sup> (COR Lazio);

26 Serio G,<sup>3</sup> De Maria L,<sup>3</sup> Caputi A,<sup>3</sup> Delfino MC,<sup>3</sup> Pentimone F<sup>3</sup> (COR Puglia);

27 Lio SG<sup>24</sup> (COR Calabria);

28 Frasca G,<sup>25</sup> Giurdanella MC,<sup>25</sup> Martorana C,<sup>25</sup> Rollo P,<sup>25</sup> Spata E,<sup>25</sup> Dardanoni G,<sup>25</sup> Scondotto S<sup>25</sup> (COR  
29 Sicilia);

30 Nieddu V,<sup>26</sup> Pergola M,<sup>26</sup> Stecchi S<sup>26</sup> (COR Sardegna).

31  
32  
33  
34  
35  
36  
37  
38  
39  
40  
41  
42  
43 **Correspondence to**

44 Dr Dario Consonni, Epidemiology Unit, Fondazione IRCCS Ca' Granda Ospedale Maggiore Policlinico,  
45 Milan, Italy; dario.consonni@unimi.it; dario.consonni@policlinico.mi.it

46  
47  
48  
49  
50 **Key words:** case-control study, asbestos, pleural cancer; mesothelioma, construction industry, occupations

51  
52  
53 **Word counts:** abstract 288; text: 3995

## ABSTRACT

**Objectives** Workers in the construction industry have been exposed to asbestos in various occupations. In Italy, a national mesothelioma registry has been implemented more than 20 years ago. Using cases selected from this registry and exploiting existing control datasets, we estimated relative risks for pleural mesothelioma (PM) among construction workers.

**Design** Case-control study.

**Setting** Cases from the national mesothelioma registry (2000-2018), controls from three previous case-control studies.

**Methods** We selected male PM incident cases diagnosed in 2000-2018. Population controls were taken from three studies performed in six Italian regions within two periods (2002-2004 and 2012-2016). Age- and period-adjusted unconditional logistic regression models were fitted to estimate odds ratios (ORs) for occupations in the construction industry. We followed two approaches, one (primary) excluding and the other (secondary) including subjects employed in other non-construction blue collar occupations for >5 years. For both approaches, we performed an overall analysis including all cases and, given the incomplete temporal and geographic overlap of cases and controls, three time or/and space restricted sensitivity analyses.

**Results** The whole dataset included 15 592 cases and 2210 controls. With the primary approach (4797 cases, 1085 controls), OR was 3.64 (2181 cases) for subjects ever employed in construction. We found elevated risks for blue collar occupations (1993 cases, OR 4.52), including bricklayers (988 cases, OR 7.05), general construction workers (320 cases, OR 4.66), plumbers and pipe fitters (305 cases, OR 9.13), painters (104 cases, OR 2.17), and several others. Sensitivity analyses yielded very similar findings. Using the secondary approach we observed similar patterns, but ORs were remarkably lower.

**Conclusions** We found markedly increased pleural mesothelioma risks for most occupations in the construction industry. These findings are relevant for compensation of subjects affected with mesothelioma in the construction industry.

### Strength and limitations of this study

- The current study benefited from the use of high quality data covering the period from 2000 to 2018 from the National Mesothelioma Registry (ReNaM), an epidemiological surveillance program organized as a network of regional operating centers which perform active search of mesothelioma cases
- Using a control-initiated case-control approach, we exploited three existing control datasets, mostly population-based, covering different periods and regions
- To minimize confounding, in a primary approach, we excluded subjects ever employed in non-construction blue collar occupations for >5 years

- The main limitation was the incomplete spatial and temporal overlap between pleural mesothelioma cases and controls.
- However, various sensitivity analyses with temporal or/and spatial restrictions confirmed the validity of using all cases occurred in the whole period in the whole Italian territory.

For peer review only

## INTRODUCTION

Asbestos is the generic commercial designation for a group of naturally occurring mineral silicate fibers of the serpentine and amphibole series. These include the serpentine mineral chrysotile (“white asbestos”), and the five amphibole minerals actinolite, amosite (“brown asbestos”), anthophyllite, crocidolite (“blue asbestos”), and tremolite. All forms of asbestos are carcinogenic, causing mesothelioma (any site) and cancer of the lung, larynx, and ovary.<sup>1</sup> Malignant mesothelioma (MM) is a rare and aggressive neoplasm arising from pleura (>90%), peritoneum (<10%), pericardium (<1%), and tunica vaginalis testis (<1%). Notwithstanding the asbestos ban in about 70 countries, due to the long latency between exposure and MM occurrence, the number of MM deaths caused by asbestos in recent years is in the order of 25-38 thousand per year.<sup>2-4</sup>

Italy produced and consumed large quantities of asbestos until the ban in 1992. For this reason, it is among the countries with the highest MM death rates<sup>5,6</sup> and with a high burden of asbestos-related diseases in general.<sup>7</sup> Pleural mesothelioma (PM) incidence and mortality are expected to remain high in the next decades.<sup>8,9</sup> In Italy (decree 308/2002) a national MM registry (Registro Nazionale Mesoteliomi, ReNaM) has been formally established (although some regions had already started registration in the 1990s). ReNaM recorded more than 30,000 MM cases in the period 1993-2018.<sup>10</sup> Construction is among the industries with the largest asbestos use in the past and is paying the largest toll: of 17 191 cases with occupational exposure, 3574 MM cases (20.8%), almost all men, had been exposed in the construction industry.<sup>10</sup>

Recently, a case-control study in Italy showed elevated PM risks for workers of various industries with a large use of asbestos. For male workers ever employed in the construction industry, an odds ratio (OR) of 1.94 was found (119 cases, 77 controls), to which several blue collar occupations contributed.<sup>11</sup>

In this work, we performed a “control-initiated case-control study”<sup>12</sup> to examine more in depth the PM relative risks in male construction workers. A control-initiated study is an efficient way to use existing control series to perform a case-control study. Controls could be drawn from a population survey or from the control groups of earlier case-control studies. In this study we took PM cases from the national MM registry and exploited three existing datasets of controls: 1) Controls from the Environment And Genetics in Lung cancer Etiology (EAGLE) study,<sup>13</sup> a large population-based case-control study performed in the Lombardy region in the period 2002-2005 (controls enrolled in 2002-2004), used for PM cases diagnosed in 2000-2009; 2) Controls from the “Multicentre Italian Study on the Etiology of Mesothelioma” MISEM study (quoted in the previous paragraph),<sup>11</sup> a population-based case-control study performed in five Italian regions in the period 2012-2014, used for PM cases diagnosed in 2010-2018; 3) Controls from the “Cholangiocarcinoma Aetiology: Role of Asbestos” (CARA) study (unpublished), a hospital-based case-control study performed in the Emilia-Romagna region in the period 2014-2016, used for PM cases diagnosed in 2010-2018.

We analyzed PM risk for various occupations in the construction sector. We followed and compared two kinds of approaches: 1) Primary approach, in which subjects ever employed in non-construction blue collar occupations for more than 5 years were excluded from both “exposed” (ever employed in construction occupations) and “reference” (never employed in construction occupations) groups, thus overcoming potential



1 confounding from asbestos exposure in other occupations; 2) Secondary approach, in which all subjects (also  
2 those employed >5 years in non-construction blue collar occupations) were included.

3  
4 For both approaches, we performed four analyses. In the overall analysis we exploited all PM cases  
5 recorded in the whole country (60 million people) by the national registry in the period 2000-2018. In this  
6 way, we could strengthen and possibly expand MISEM results by covering the whole nation and a wider study  
7 period with a larger sample size. Ideally, as in any case-control study, including control-initiated studies, cases  
8 and controls should come from the same study base. In this study, cases came from the whole country and the  
9 whole period, while controls were collected only in some areas in restricted periods. Therefore, in order to  
10 verify the validity of results, we performed three sensitivity analyses by applying time, space, and time-space  
11 restrictions to PM cases in order to match more closely the study base of which controls are a sample. We  
12 previously used a similar approach in two case-control studies on mesothelioma of the peritoneum<sup>14</sup> and of  
13 the pericardium and tunica vaginalis testis,<sup>15</sup> in which findings using all cases were remarkably similar to  
14 those obtained by applying time or/and space restrictions.

## 23 24 **METHODS**

### 25 26 **The National Mesothelioma Registry (ReNaM)**

27  
28 The National Mesothelioma Registry (ReNaM) is an epidemiological surveillance program organized as a  
29 network of regional operating centers (Centri Operativi Regionali, COR). It was formally established by law  
30 277/1991 in 2002 (although some Italian regions had started in the early 1990s). Report of MM cases to CORs  
31 is compulsory (law 277/1991 and 81/2008). However, since reporting is incomplete, CORs actively search  
32 newly diagnosed cases by exploiting several information sources, including databases of hospital admissions  
33 and mortality, archives of pathology reports, and reports of occupational diseases. Based on the clinical  
34 information, confirmed cases are classified as “definite” (histological diagnosis, usually with  
35 immunohistochemical confirmation), “probable” (usually, cytological diagnosis and confirmation by positive  
36 imaging) or “possible” (positive imaging).

37  
38 MM patients or their next-of-kin are then interviewed (mostly face-to-face) by qualified personnel using a  
39 standardized ReNaM questionnaire that investigates lifetime job history: in particular, information about  
40 industry, occupation, tasks, and the working environment are collected for each job. Industries and  
41 occupations are coded respectively using the Italian classifications of industries (ATECO, 1991) and of  
42 occupations (CIP, 1991). The questionnaire also collects lifetime residential histories and occupational  
43 histories of family members.

44  
45 According to ReNaM guidelines, lifetime asbestos exposure is evaluated by experts and classified as  
46 occupational (definite, probable, possible) and (only for non-occupationally exposed cases), extra-  
47 occupational. Subjects with no evidence of asbestos exposure at interview are considered as non-exposed.  
48 This information was not exploited in this paper because the focus is on occupations (independently from  
49 asbestos exposure collected at interview).

## Controls

We used three sets of controls enrolled in different geographical areas and periods.

The first set of controls was taken from the EAGLE study.<sup>13</sup> Controls had been randomly sampled in 2002-2004 among 1.6 million residents aged 35-79 years in 216 out of 725 municipalities in five Lombardy (Northern Italy) provinces (Milan, Monza, Brescia, Pavia and Varese, 3.5 million residents). Subjects underwent a computer assisted personal interview using a questionnaire (available on website <https://eagle.cancer.gov/questionnaires.html>), which collected information on lifetime occupational history (industry, occupation, and years of start/stop) for each job carried out for more than six months.

The second set of controls came from the MISEM study, conducted in five regions (Lombardy, Piedmont, and Veneto in Northern Italy, Tuscany in Central Italy, and Apulia in Southern Italy).<sup>11</sup> In Piedmont the population was limited to residents of the province of Turin and the local health district of Casale Monferrato. In Veneto the population from the provinces of Padua and Venice was included. Controls were randomly sampled from residents aged 31-92 years in 2012-2014. Subjects were face-to-face interviewed with the ReNaM questionnaire.

The third set of controls was taken from the CARA study performed in Emilia-Romagna (Northern Italy) in the period 2014-2016. Hospital controls aged 22-92 years were interviewed face-to-face with a detailed questionnaire, including occupational sections taken from the ReNaM questionnaire.

Since CARA controls were few and were enrolled in a period overlapping with MISEM, in statistical analyses CARA and MISEM controls were pooled together.

## Cases

From the ReNaM database, we extracted all PM cases diagnosed in the period 2000-2018 with any level of diagnostic certainty (certain, probable, possible). We divided cases into two main periods of incidence (2000-2009 and 2010-2018). We subsequently performed three sensitivity analyses by applying time, space, and time-space restrictions to cases in order to match more closely the study base of controls (see below).

## Coding of industries and occupations

The information used for this work consisted simply of industries and occupations and was collected in a similar way across cases/controls series. Although different persons performed coding, there was some overlap: for cases and MISEM/CARA controls the coders were the same within participating regions; in Lombardy, EAGLE controls and MISEM cases and controls were coded by the same person.

With regard to controls in all three studies, industries and occupations had been coded following the International Standard Industrial Classification of All Economic Activities (ISIC, 1971) and the International Standard Classification of Occupations (ISCO, 1968),<sup>16</sup> respectively. Work histories of controls in the MISEM study had been coded using both Italian and International classifications of industries (ATECO-91 and ISIC-71) and occupations (CIP-91 and ISCO-68).

1 For cases in the ReNaM database, we exploited a recently developed crosswalk to translate Italian CIP-91  
2 codes of occupations into ISCO-68 codes.<sup>17</sup> To improve comparability of cases and controls, we applied the  
3 crosswalk also to MISEM controls.  
4

5 The construction industry was identified with the ISIC-71 code 5000 or the corresponding ATECO-91 code  
6 45. The groups of occupations considered within the construction industry were the ISCO-68 minor group 95  
7 (Bricklayers, carpenters and other construction workers), and the following three-digit unit groups:  
8 Bricklayers, stonemasons and tile setters (951); Reinforced-concreters, cement and terrazzo workers (952);  
9 Roofers (953); Carpenters, joiners and parquetry workers (954); Plasterers (955); Insulators (956); Glaziers  
10 (957); and Construction workers not elsewhere classified (959). We also separately analyzed Bricklayers  
11 (95120). In addition, we evaluated PM risk for the following other three-digit unit groups: Electrical wiremen  
12 (855); Electrical linemen and cable jointers (857); Plumbers and pipe fitters (871); Welders and flame-cutters  
13 (872); Sheet-metal workers (873); Structural metal preparers and erectors (874); Painters, construction (931);  
14 Crane and hoist operators (973); Earth-moving and related machinery operators (974); Motor-vehicle drivers  
15 (985); Labourers not elsewhere classified (999).  
16  
17  
18  
19  
20  
21  
22  
23

#### 24 **Statistical analysis**

25 We assessed the relative risks of PM associated with ever employment in construction industry. The majority  
26 of construction workers were men, so women were excluded from analyses. We performed analyses for  
27 selected groups of occupations, with subjects who were ever employed in multiple occupations included in  
28 each analysis.  
29  
30  
31  
32

33 Unconditional logistic regression models adjusted for age (<50, 50-54, 55-59, 60-64, 65-69, 70-74, 75-79,  
34 80-84, 85+) and period (two periods, 2000-2009 and 2010-2018) were fitted to calculate ORs. We calculated  
35 90% confidence intervals (CI) in order to avoid a reductive interpretation of CIs as significance tests.<sup>18</sup> The  
36 reference group was made up of subjects never employed in the construction industry.  
37  
38  
39

40 We followed two kinds of approaches:

41 1) Primary approach, in which subjects ever employed in non-construction blue collar occupations for >5  
42 years were excluded from both “exposed” (ever employed in construction occupations) and “reference” (never  
43 employed in construction occupations) categories. A similar approach has been used previously,<sup>19</sup> and has the  
44 advantage to minimize potential confounding from asbestos exposure in other (mainly blue collar)  
45 occupations;  
46  
47  
48  
49

50 2) Secondary approach, theoretically less preferable, in which all subjects (also those employed >5 years  
51 in non-construction blue collar occupations) were included.  
52  
53

54 Blue collar occupations were identified using the following ISCO-68 codes: 55 (Building caretakers,  
55 charworkers, cleaners and related workers); 56 (Lauderers, dry-cleaners and pressers); 581 (Firefighters);  
56 628 (Farm machinery operators); 631 (Loggers); and all the three major groups 7/8/9 (Production and related  
57 workers, transport equipment operators and labourers).<sup>20</sup>  
58  
59  
60

For both primary and secondary approaches we performed the following four analyses:

- 1) Analysis 1 (A1). Overall analysis in which we included all cases recorded by ReNaM in 2000-2009 (exploiting EAGLE controls) and 2010-2018 (exploiting MISEM and CARA controls pooled together);
- 2) Analysis 2 (A2). Temporally restricted analyses in which we included only cases first diagnosed in the same years of enrolment of EAGLE (2002-2004) or MISEM/CARA (2012-2016) controls;
- 3) Analysis 3 (A3). Spatially restricted analysis, in which we included only cases living in the same Lombardy Provinces of EAGLE (2000-2009) and in the same six regions of MISEM/CARA (2010-2018) controls;
- 4) Analysis 4 (A4). Temporally and spatially restricted analysis, in which we applied both restrictions of analyses A2 and A3, i.e., cases 2002-2004 living in the same Lombardy Provinces of EAGLE controls and cases 2012-2016 living in the same regions of MISEM/CARA controls. This analysis is theoretically preferable (although based on a smaller sample size) because cases match more closely the study base (the population-time source of controls).

With the primary approach, we performed an overall analysis A1 by length of employment for occupation with at least 10 exposed controls.

Figure 1 shows numbers of cases and controls included in the overall analysis (time and space unrestricted analysis A1) under primary and secondary approach. Supplementary Figures 1-3 show numbers of cases and controls included in time or/and space restricted analysis A2-A4 under primary and secondary approach).

Figure 1 here.

All analyses were performed using Stata 17 (Stata Corp. 2021, College Station, TX, USA).

### **Patients and public involvement**

We used existing datasets of cases and control. Therefore, subjects could not be involved in the design, conduct, reporting, or dissemination plans of our research.

## **RESULTS**

For the period 2000-2018, 15 592 records for men with PM were extracted from the ReNaM database, 7985 (51.2%) in the period 2000-2009 and 7607 in 2010-2018 (Figure 1). Controls were 2210 in total, 1617 from EAGLE study (2002-2004) and 593 from MISEM/CARA studies (2012-2016, 490 from MISEM, 103 from CARA).

During the whole study period, there were 4729 (30.3%) out of 15 592 PM cases ever employed in the construction industry, while controls were 402 (18.2%) among 2210 (Table 1). The proportions of ever employed in construction were remarkably similar in the two periods: among cases, 2372 (29.7%) out of 7985 in 2000-2009 and 2357 (31.0%) out of 7607 in 2010-2018; among EAGLE controls, 299 (18.5%) out of 1617 in 2002-2004 and 103 (17.4%) out of 593 MISEM/CARA controls in 2012-2016.

In both periods, the distribution of cases by age was fairly similar to that of controls. The majority of cases (9195, 59.0%) completed a personal interview with the ReNaM questionnaire. A definite diagnosis was available for 13 368 cases (85.7%). Most cases (9499, 60.9%) were of epithelioid histology.

**Table 1** Characteristics of pleural mesothelioma cases and controls in men ever/never employed in the construction industry (ISIC-71 code 5000), Italy, 2000–2018

| Variable                  | Ever construction |       |          |       | Never construction |       |          |       |
|---------------------------|-------------------|-------|----------|-------|--------------------|-------|----------|-------|
|                           | Cases             |       | Controls |       | Cases              |       | Controls |       |
|                           | N                 | %     | N        | %     | N                  | %     | N        | %     |
| Total                     | 4729              | 100   | 402      | 100   | 10 863             | 100   | 1808     | 100   |
| Period                    |                   |       |          |       |                    |       |          |       |
| 2000-2009                 | 2372              | 50.2  | 299      | 74.4  | 5613               | 51.7  | 1318     | 72.9  |
| 2010-2018                 | 2357              | 49.8  | 103      | 25.6  | 5250               | 48.3  | 490      | 27.1  |
| Age (years)               |                   |       |          |       |                    |       |          |       |
| <50                       | 112               | 2.4   | 17       | 4.2   | 272                | 2.5   | 90       | 5.0   |
| 50-54                     | 171               | 3.6   | 25       | 6.2   | 359                | 3.3   | 98       | 5.4   |
| 55-59                     | 360               | 7.6   | 48       | 11.9  | 767                | 7.1   | 223      | 12.3  |
| 60-64                     | 553               | 11.7  | 66       | 16.4  | 1344               | 12.4  | 304      | 16.8  |
| 65-69                     | 858               | 18.1  | 98       | 24.4  | 1825               | 16.8  | 435      | 24.1  |
| 70-74                     | 966               | 20.4  | 91       | 22.6  | 2192               | 20.2  | 371      | 20.5  |
| 75-79                     | 926               | 19.6  | 45       | 11.2  | 2107               | 19.4  | 234      | 12.9  |
| 80-84                     | 538               | 11.4  | 10       | 2.5   | 1282               | 11.8  | 36       | 2.0   |
| 85+                       | 245               | 5.2   | 2        | 0.5   | 715                | 6.6   | 17       | 0.9   |
| Mean (SD)                 | 70.4              | (9.5) | 66.2     | (8.7) | 70.7               | (9.8) | 66.1     | (9.1) |
| Interview                 |                   |       |          |       |                    |       |          |       |
| Direct                    | 2933              | 62.0  | 402      | 100   | 6262               | 57.7  | 1808     | 100   |
| Next-of-kin               | 1709              | 36.1  |          |       | 4242               | 39.0  |          |       |
| None                      | 78                | 1.7   |          |       | 278                | 2.6   |          |       |
| Other                     | 9                 | 0.2   |          |       | 81                 | 0.7   |          |       |
| Diagnosis                 |                   |       |          |       |                    |       |          |       |
| Definite                  | 4117              | 87.1  |          |       | 9251               | 85.2  |          |       |
| Probable                  | 347               | 7.3   |          |       | 802                | 7.4   |          |       |
| Possible                  | 265               | 5.6   |          |       | 810                | 7.5   |          |       |
| Morphology*               |                   |       |          |       |                    |       |          |       |
| Mesothelioma, NOS (90503) | 450               | 9.5   |          |       | 1081               | 9.9   |          |       |
| Fibrous (90513)           | 479               | 10.1  |          |       | 1007               | 9.3   |          |       |
| Epithelioid (90523)       | 2897              | 61.3  |          |       | 6602               | 60.8  |          |       |
| Biphasic (90533)          | 583               | 12.3  |          |       | 1237               | 11.4  |          |       |
| Not available             | 320               | 6.8   |          |       | 936                | 8.6   |          |       |

\*Codes of the International Classification of Diseases for Oncology, Third Edition in parentheses.

ISIC, International Standard Industry Classification (1971); NOS, not otherwise specified.

Percentages may not add to 100 due to rounding.

## Primary approach

Using the primary approach (subjects employed for >5 years in non-construction blue collar occupations excluded), in the overall analysis A1 (time and space unrestricted) an OR of 3.64 was calculated for subjects ever employed in construction (2181 cases) (Table 2). This increase was driven by numerous blue collar occupations (OR 4.52), especially the large category of Bricklayers, carpenters and other construction workers (OR 5.83). Within this category (95), high relative risks were found Bricklayers (OR 7.05) and construction workers not elsewhere classified (OR 4.66), and also for other less represented occupations, although with fewer controls. Elevated risks were also for several other occupations, especially plumbers and pipe-fitters (OR 9.13) and painters (OR 2.17). ORs could not be calculated for occupations 952, 955, 957, 872, 873, and 973.

**Table 2** Pleural mesothelioma odds ratios (OR) and 90% confidence intervals (CI) for selected occupations in men in the construction industry (ISIC-71 code 5000), Italy, 2000–2018. Results of the primary approach (subjects ever employed in non-construction blue collar occupations for >5 years excluded), analysis A1

| Occupation (ISCO-68 code) | Cases | Controls | OR* | 90% CI |
|---------------------------|-------|----------|-----|--------|
| Total                     | 4797  | 1085     |     |        |

|    |                                                                    |      |     |      |           |
|----|--------------------------------------------------------------------|------|-----|------|-----------|
| 1  | Never employed in construction                                     | 2616 | 878 | 1.00 | Reference |
| 2  | Ever employed in construction                                      | 2181 | 207 | 3.64 | 3.17-4.19 |
| 3  | Blue collar occupations (55, 56, 581, 628, 631, 7-9)               | 1993 | 151 | 4.52 | 3.87-5.29 |
| 4  | Bricklayers, carpenters, and other construction workers (95)       | 1367 | 79  | 5.83 | 4.75-7.15 |
| 5  | Bricklayers, stonemasons and tile setters (951)                    | 1054 | 50  | 7.17 | 5.58-9.21 |
| 6  | Bricklayers (95120)                                                | 988  | 47  | 7.05 | 5.45-9.12 |
| 7  | Reinforced concreters, cement finishers and terrazzo workers (952) | 12   | 0   | NC   |           |
| 8  | Roofers (953)                                                      | 27   | 1   | 12.3 | 2.28-66.1 |
| 9  | Carpenters, joiners and parquetry workers (954)                    | 73   | 4   | 6.88 | 2.92-16.2 |
| 10 | Plasterers (955)                                                   | 14   | 0   | NC   |           |
| 11 | Insulators (956)                                                   | 57   | 4   | 6.27 | 2.64-14.8 |
| 12 | Glaziers (957)                                                     | 0    | 4   | NC   |           |
| 13 | Construction worker, not elsewhere classified (959)                | 320  | 22  | 4.66 | 3.21-6.77 |
| 14 | Other blue collar occupations                                      |      |     |      |           |
| 15 | Electrical wiremen (855)                                           | 97   | 16  | 2.34 | 1.48-3.69 |
| 16 | Electrical linemen and cable jointers (857)                        | 41   | 4   | 3.79 | 1.58-9.13 |
| 17 | Plumbers and pipe fitters (871)                                    | 305  | 12  | 9.13 | 5.58-14.9 |
| 18 | Welders and flame-cutters (872)                                    | 3    | 0   | NC   |           |
| 19 | Sheet-metal workers (873)                                          | 16   | 0   | NC   |           |
| 20 | Structural metal preparers and erectors (874)                      | 34   | 1   | 13.1 | 2.51-71.6 |
| 21 | Painters, construction (931)                                       | 104  | 18  | 2.17 | 1.41-3.36 |
| 22 | Crane and hoist operators (973)                                    | 17   | 0   | NC   |           |
| 23 | Earth-moving and related machinery operators (974)                 | 48   | 7   | 2.39 | 1.20-4.75 |
| 24 | Motor-vehicle drivers (985)                                        | 14   | 4   | 1.05 | 0.39-2.81 |
| 25 | Labourers, not elsewhere classified (999)                          | 31   | 3   | 3.43 | 1.24-9.48 |

ISCO, International Standard Classification of Occupations (1968); ISIC, International Standard Industry Classification (1971); NC, not calculable.

\*OR calculated with unconditional logistic regression models adjusted for age (categorical) and period.

The pattern of analysis A1 was largely confirmed in primary time or/and space restricted analyses A2-A4 (Figures 2-3).

Figures 2 and 3 here

The analysis by length of employment (in which we excluded a few subjects who lacked years of start/stop work) shows that PM risk was increased also for those who worked for less than 20 years (there were no positive trends when we excluded the reference category, except for the minor group 95) (Supplementary Table 1).

### Secondary approach

With the secondary approach (all subjects included, also those employed for >5 years in non-construction blue collar occupations), in the overall analysis A1 (time and space unrestricted) we observed a pattern similar to that obtained with the primary approach, but ORs were substantially lower (Supplementary Table 2). In addition, the time or/and space restricted analyses A2-A4 yielded results which were in general quite similar to those of the overall analysis A1 (Supplementary Figures 4-5).

## DISCUSSION

In this nationwide Italian study covering nearly two decades (2000-2018), we found markedly elevated risks of pleural mesothelioma among males for most blue collar occupations in the construction industry, in particular (in order of number of cases): bricklayers; general construction workers (i.e., construction workers not elsewhere classified); plumbers and pipe fitters; painters; electrical wiremen; carpenters, joiners and

1 parquetry workers; insulators; earth-moving and related machinery operators; electrical linemen and cable  
2 jointers; structural metal preparers and erectors; labourers; roofers. Findings of this primary approach were in  
3 general highly consistent across various supplementary analyses with different study base samples (i.e., with  
4 space/time restriction inclusion of cases).  
5  
6

7 These results may not fully generalized to countries with different patterns of asbestos use. Among these  
8 use factors are differential quantity of asbestos-containing products employed, work practices, organization  
9 of the construction industry, differences in work tasks by occupation, and relative quantities of different fiber  
10 types used in the Italian construction industry. Unlike other countries (e.g., France where almost all the  
11 asbestos used was imported and chrysotile was the most commonly used type),<sup>21</sup> chrysotile and amphiboles  
12 were produced and used to manufacture asbestos-cement products for the construction industry in Italy.<sup>22</sup>  
13 Moreover, the Italian construction industry is organized into many small and medium enterprises, so that  
14 workers in various occupations (including the large group of bricklayers) may perform a variety of tasks and/or  
15 work in close contact with workers performing tasks entailing asbestos exposure.<sup>23</sup> In addition, although there  
16 are real differences in working practices in the construction sector across countries, we cannot exclude that  
17 the large number of bricklayers among cases in our study may be due to coding procedures, e.g., use of ISCO-  
18 68 code 95120 instead of less specific codes 95910 (Housebuilders) or 95990 (Other construction workers),  
19 as already noted in a large pooled analysis of case-control study on lung cancer.<sup>24</sup> These factors might explain  
20 the large number of bricklayers among cases in our study and the magnitude of elevated risks we found for  
21 most occupations in the construction sector.  
22  
23  
24  
25  
26  
27  
28  
29  
30  
31  
32

33 Our findings are, however, largely in agreement with many studies published in various countries. To name  
34 a few, studies that showed increased mesothelioma risks in the construction sector and associated occupations  
35 were performed in Canada,<sup>25</sup> France,<sup>26</sup> Italy,<sup>11</sup> Spain,<sup>27</sup> Nordic countries,<sup>28-31</sup> UK,<sup>19 32 33</sup> and USA.<sup>34 35</sup> Asbestos  
36 (all forms) has been widely used worldwide in the construction industry due to its physical properties (flame-  
37 retardant, sound-absorbing, electrical and heat resistance) in insulation works (e.g., pipes, chimneys) and to  
38 build roofs with corrugated asbestos-cement sheets. In Europe, estimates of the number of workers exposed  
39 to asbestos have been developed by CAREX (CARcinogen EXposure). Based on data collected during 1990-  
40 1993, it has been estimated that, out of a total of 1.2 million workers exposed to asbestos, those employed in  
41 the construction industry were 574 000<sup>1</sup> and that 5.2% of male workers in construction industry were exposed  
42 to asbestos.<sup>36</sup> Some occupational groups used asbestos directly (e.g., insulators and roofers, plumbers and pipe  
43 fitters), while others were likely were additionally exposed indirectly, or as bystanders, because they worked  
44 in areas where other workers handled asbestos.<sup>37</sup> Finally, many workers have been exposed due to removal of  
45 asbestos-containing materials. Most importantly, in this (as in other) industrial settings, the awareness of  
46 workers of health risks of asbestos exposure in the periods when these subjects were exposed was limited.  
47 Little attempt was made to inform workers and protect them from asbestos exposure. Even now, preventive  
48 measures (technical, organizational, and personal) may be difficult to implement in this complex sector in  
49  
50  
51  
52  
53  
54  
55  
56  
57  
58  
59  
60

1 which several tasks are performed by different workers within shared and always changing environments,  
2 especially in small or medium size companies.

3  
4 Therefore, due to the large number of workers and the failure to implement preventive measures, the  
5 construction industry suffers the largest mesothelioma burden in many countries. For instance, a study in UK  
6 estimated that asbestos was responsible for more than half of the cancer registrations in construction and 70%  
7 of cancer deaths (2568 deaths, including 1249 lung cancers and 1292 mesotheliomas).<sup>38</sup> In Italy, in the period  
8 1993-2018, the construction industry ranked first in the number of mesothelioma cases (3574, 16.2%) reported  
9 to ReNaM, including 1332 bricklayers, 383 general construction workers, 232 plumbers and pipe fitters, 140  
10 stonemasons, 117 electricians, and 114 insulators.<sup>39</sup> Moreover, the proportion of mesothelioma cases among  
11 construction workers showed an increasing trend from 15.8% in the 1993-1998 period to 23.9% in 2014-  
12 2018.<sup>10</sup>

### 19 **Asbestos exposure after the asbestos ban (1992)**

20 Findings in this study mostly concern exposure occurred before the asbestos ban in 1992. However, it has  
21 been estimated that more than 30 million tons of asbestos-containing material was installed in the Italian  
22 territory in 1992 and that about 23 million tons are yet to be reclaimed.<sup>40</sup> In an update of CAREX for Italy  
23 (2000-2003) it was estimated that 70 000 workers were still exposed to asbestos.<sup>41</sup> Hence, asbestos exposure  
24 continued to occur after the ban and may do so in future years or decades unless adequate preventive measures  
25 are used during asbestos removal. A recent study in Italy covering the period 1996-2013 showed that workers  
26 employed in the removal and disposal of asbestos-containing materials may be exposed to asbestos levels  
27 above the national action limit (0.01 fibers/cc) and occasionally also the European action limit at 0.1  
28 fibers/cc.<sup>42</sup>

### 36 **Strengths and limitations**

37 The study has several strengths. First, the pleural mesothelioma case series was extracted from the database  
38 of a national registry (ReNaM) in which active search for MM cases is performed according to common  
39 procedures: in particular, standardized criteria are used for MM diagnosis classification and collection and  
40 evaluation of lifetime job histories collected by a structured questionnaire.<sup>10</sup> Second, our study included MM  
41 cases from the whole country and covered a large time window (2000-2018). This was possible thanks to a  
42 recently developed crosswalk which allowed translation of thousands of Italian codes of occupations into  
43 international (ISCO-68) codes.<sup>17</sup> Third, we used three control series for the large majority (95.3% of 2210)  
44 randomly sampled from the general population (EAGLE and MISEM studies). Fourth, analogous to other  
45 studies,<sup>19</sup> we could perform analyses in which we excluded subjects employed in non-construction blue-collar  
46 occupations for more than 5 years: this approach reduced potential confounding from asbestos exposure in  
47 non-construction occupations and yielded relative risk estimates markedly higher than the other approach (in  
48 which all subjects were included).<sup>11 26</sup>

49 The study has some limitations. First, although the three control series covered about 30 million people  
50 (half of the Italian population) over eight years, the overlap of cases with controls was only partial. However,  
51  
52  
53  
54  
55  
56  
57  
58  
59  
60



1 the various time and space restricted supplementary analyses produced quite consistent results, with few  
2 exceptions, showing that theoretically less preferable samples of the study base performed quite well in  
3 practice. This is in agreement with previous studies on peritoneal mesothelioma in Lombardy<sup>14</sup> and on  
4 mesothelioma of pericardium and tunica vaginalis testis in Italy.<sup>15</sup> A similar approach, though criticized,  
5 proved to be valid also in case-control studies on pleural mesothelioma in France.<sup>43-45</sup> A second limitation  
6 pertains to information quality, since in the various studies, different persons performed data collection.  
7 However, the personnel were adequately trained, and we used only simple information on industries and  
8 occupations: hence, we do not expect substantially different accuracy across studies and case-control status.  
9 Conversely, errors and heterogeneity in coding occupations are likely, because the international codes of  
10 industries and occupations were assigned by different persons or were derived from Italian codes by applying  
11 a crosswalk, which probably caused some degree of misclassification of occupations.  
12  
13  
14  
15  
16  
17  
18  
19  
20

## 21 CONCLUSIONS

22 The existence of a national epidemiological surveillance system of mesothelioma covering the whole Italian  
23 territory for e more than 20 years enabled this nationwide case-control study with almost all controls sampled  
24 from the general population. We found clearly increased pleural mesothelioma risk for most occupations in  
25 the construction industry. This is due to the past widespread use of asbestos in this economic sector and is  
26 consistent with findings in international literature. Our results are relevant for compensation of workers  
27 affected with mesothelioma in the construction industry.  
28  
29  
30  
31  
32

33 Given that huge amounts of asbestos-containing materials are still present in the environment, the potential  
34 for asbestos exposure still exists if adequate technical, organizational, and personal preventive measures are  
35 not taken during asbestos manipulation. In the future special attention to surveillance of mesothelioma (and  
36 other asbestos-related diseases like lung cancer) must be given for workers employed in asbestos removal  
37 after the asbestos ban in 1992.  
38  
39  
40  
41  
42  
43  
44  
45  
46  
47  
48  
49  
50  
51  
52  
53  
54  
55  
56  
57  
58  
59  
60

**Acknowledgements** The authors thank all personnel involved in epidemiological surveillance of mesothelioma incidence and asbestos exposure assessment and the affected subjects and their family members for granting interviews.

**Contributors** SS: statistical analysis, manuscript drafting; DC, conceptualization, study design, statistical supervision, manuscript drafting; EM: manuscript drafting and statistical analysis (MISEM study); DCa, LV: data collection (MISEM study); MTL, NEC: principal investigators (EAGLE study); SC, SM, GB: principal investigators, data collection (CARA study); AS, LM, SP, CG, SE, SMu, VC, VCo, CN, FDA, CGe, LB, AR, IG, GM, IC, ER, TS, FC, ML, FT, GC, MM: data collection (Regional Operating Centers); AM: director (ReNaM), study conceptualization; AB: data management (ReNaM); CM: study design, data collection, manuscript drafting. All authors contributed to interpretation of findings and discussion. All authors revised and approved the manuscript for intellectual content.

**Funding** This work was partially supported by the Istituto Nazionale per l'Assicurazione contro gli Infortuni sul Lavoro (INAIL), Rome, Italy: Project BRIC ID 55 (2019).

**Competing interests** DC, SM, CM served as consultants in trials concerning asbestos-related diseases.

**Patient consent for publication** As reporting of mesothelioma to the National Mesothelioma Registry (ReNaM) is compulsory by law (277/1991 and 81/2008), ethics approval is not required for cases. In the EAGLE, MISEM, and CARA studies, enrolled subjects signed an informed consent form.

**Ethics approval** The EAGLE, MISEM, and CARA studies were approved by the following institutional review boards (IRBs): National Cancer Institute Special Studies IRB: 01-C-N211, National Cancer Institute, Bethesda, Maryland, USA (EAGLE); Comitato Etico Interaziendale, AOU San Giovanni Battista di Torino and AO CTO/Maria Adelaide di Torino, Turin, Italy: CEI-589 (MISEM); Comitato Etico del Policlinico di Sant'Orsola, Bologna, Italy: 111/2013/U/OssN (CARA).

**Provenance and peer review** Not commissioned; externally peer reviewed.

**Data availability statement** Data are not publicly available.

## **ORCID iDs**

Simona Stella <http://orcid.org/0000-0003-4276-2583>

Dario Consonni <http://orcid.org/0000-0002-8935-3843>

Enrica Migliore <http://orcid.org/0000-0003-0121-6295>

1 Domenica Cavone <http://orcid.org/0000-0002-2009-1806>  
2 Luigi Vimercati <http://orcid.org/0000-0002-4072-2871>  
3 Lucia Miligi <http://orcid.org/0000-0002-8223-485X>  
4 Sara Piro <http://orcid.org/0000-0003-4198-7035>  
5 Neil E Caporaso <http://orcid.org/0000-0001-7562-4609>  
6 Stefania Curti <http://orcid.org/0000-0003-4343-8873>  
7 Stefano Mattioli <http://orcid.org/0000-0002-9639-7430>  
8 Giovanni Brandi <http://orcid.org/0000-0003-0013-2858>  
9 Corrado Negro <http://orcid.org/0000-0002-2007-3608>  
10 Carlo Genova <http://orcid.org/0000-0003-3690-8582>  
11 Antonio Romanelli <http://orcid.org/0000-0003-4899-1889>  
12 Iolanda Grappasonni <http://orcid.org/0000-0003-1131-4286>  
13 Ilaria Cozzi <http://orcid.org/0000-0003-0313-9799>  
14 Tommaso Staniscia <http://orcid.org/0000-0002-5077-515X>  
15 Federico Tallarigo <http://orcid.org/0000-0002-4131-9531>  
16 Alessandro Marinaccio <http://orcid.org/0000-0001-9068-2137>  
17 Alessandra Binazzi <http://orcid.org/0000-0002-0435-600X>  
18 Carolina Mensi <http://orcid.org/0000-0002-9075-3684>  
19  
20  
21  
22  
23  
24  
25  
26  
27  
28  
29  
30  
31  
32  
33  
34  
35  
36  
37  
38  
39  
40  
41  
42  
43  
44  
45  
46  
47  
48  
49  
50  
51  
52  
53  
54  
55  
56  
57  
58  
59  
60

**REFERENCES**

1. IARC Monographs on the Evaluation of Carcinogenic Risks to Humans. *Arsenic, Metals, Fibres, and Dusts*. Lyon, France: International Agency for Research on Cancer, 2012.
2. Global, regional, and national comparative risk assessment of 84 behavioural, environmental and occupational, and metabolic risks or clusters of risks for 195 countries and territories, 1990-2017: a systematic analysis for the Global Burden of Disease Study 2017. *Lancet* 2018;392(10159):1923-94.
3. GBD 2016 Occupational Carcinogens Collaborators. Global and regional burden of cancer in 2016 arising from occupational exposure to selected carcinogens: a systematic analysis for the Global Burden of Disease Study 2016. *Occup Environ Med* 2020;77(3):151-9.
4. Odgerel CO, Takahashi K, Sorahan T, *et al*. Estimation of the global burden of mesothelioma deaths from incomplete national mortality data. *Occup Environ Med* 2017;74(12):851-8.
5. Park EK, Takahashi K, Hoshuyama T, *et al*. Global magnitude of reported and unreported mesothelioma. *Environ Health Perspect* 2011;119(4):514-8.
6. Rath EM, Yuen ML, Odgerel CO, *et al*. The Ecological Association between Asbestos Consumption and Asbestos-Related Diseases 15 Years Later. *Environ Health Perspect* 2022;130(5):57703.
7. Fazzo L, Binazzi A, Ferrante D, *et al*. Burden of Mortality from Asbestos-Related Diseases in Italy. *Int J Environ Res Public Health* 2021;18(19).
8. Oddone E, Bollon J, Nava CR, *et al*. Predictions of Mortality from Pleural Mesothelioma in Italy After the Ban of Asbestos Use. *Int J Environ Res Public Health* 2020;17(2).
9. Oddone E, Bollon J, Nava CR, *et al*. Effect of Asbestos Consumption on Malignant Pleural Mesothelioma in Italy: Forecasts of Mortality up to 2040. *Cancers (Basel)* 2021;13(13).
10. Binazzi A, Di Marzio D, Verardo M, *et al*. Asbestos Exposure and Malignant Mesothelioma in Construction Workers-Epidemiological Remarks by the Italian National Mesothelioma Registry (ReNaM). *Int J Environ Res Public Health* 2021;19(1).
11. Migliore E, Consonni D, Peters S, *et al*. Pleural mesothelioma risk by industry and occupation: results from the Multicentre Italian Study on the Etiology of Mesothelioma (MISEM). *Environ Health* 2022;21(1):60.
12. Greenland S. Control-initiated case-control studies. *Int J Epidemiol* 1985;14(1):130-4.
13. Landi MT, Consonni D, Rotunno M, *et al*. Environment And Genetics in Lung cancer Etiology (EAGLE) study: an integrative population-based case-control study of lung cancer. *BMC Public Health* 2008;8:203.
14. Consonni D, Calvi C, De Matteis S, *et al*. Peritoneal mesothelioma and asbestos exposure: a population-based case-control study in Lombardy, Italy. *Occup Environ Med* 2019;76(8):545-53.
15. Marinaccio A, Consonni D, Mensi C, *et al*. Association between asbestos exposure and pericardial and tunica vaginalis testis malignant mesothelioma: a case-control study and epidemiological remarks. *Scand J Work Environ Health* 2020;46(6):609-17.
16. Consonni D, De Matteis S, Lubin JH, *et al*. Occupational risks for lung cancer in a population-based case-control study. *Am J Epidemiol* 2010;171(3):323-33.

17. Spinazze A, Consonni D, Borghi F, *et al.* Development of a Crosswalk to Translate Italian Occupation Codes to ISCO-68 Codes. *Ann Work Expo Health* 2022;66(6):815-21.
18. Sterne JA, Davey Smith G. Sifting the evidence-what's wrong with significance tests? *BMJ* 2001;322(7280):226-31.
19. Rake C, Gilham C, Hatch J, *et al.* Occupational, domestic and environmental mesothelioma risks in the British population: a case-control study. *Br J Cancer* 2009;100(7):1175-83.
20. Ahrens W, Merletti F. A standard tool for the analysis of occupational lung cancer in epidemiologic studies. *Int J Occup Environ Health* 1998;4(4):236-40.
21. Lacourt A, Gramond C, Rolland P, *et al.* Occupational and non-occupational attributable risk of asbestos exposure for malignant pleural mesothelioma. *Thorax* 2014;69(6):532-9.
22. Mensi C, Riboldi L, De Matteis S, *et al.* Impact of an asbestos cement factory on mesothelioma incidence: global assessment of effects of occupational, familial, and environmental exposure. *Environ Int* 2015;74:191-9.
23. Vimercati L, Cavone D, De Maria L, *et al.* Mesothelioma risk among construction workers according to job title: data from the Italian Mesothelioma Register. *Med Lav* 2023;114(3):e2023025.
24. Consonni D, De Matteis S, Pesatori AC, *et al.* Lung cancer risk among bricklayers in a pooled analysis of case-control studies. *Int J Cancer* 2015;136(2):360-71.
25. DeBono NL, Warden H, Logar-Henderson C, *et al.* Incidence of mesothelioma and asbestosis by occupation in a diverse workforce. *Am J Ind Med* 2021;64(6):476-87.
26. Rolland P, Gramond C, Lacourt A, *et al.* Occupations and industries in France at high risk for pleural mesothelioma: A population-based case-control study (1998-2002). *Am J Ind Med* 2010;53(12):1207-19.
27. Agudo A, Gonzalez CA, Bleda MJ, *et al.* Occupation and risk of malignant pleural mesothelioma: A case-control study in Spain. *Am J Ind Med* 2000;37(2):159-68.
28. Plato N, Martinsen JI, Sparen P, *et al.* Occupation and mesothelioma in Sweden: updated incidence in men and women in the 27 years after the asbestos ban. *Epidemiol Health* 2016;38:e2016039.
29. Pukkala E, Martinsen JI, Lynge E, *et al.* Occupation and cancer - follow-up of 15 million people in five Nordic countries. *Acta Oncol* 2009;48(5):646-790.
30. Jarvholm B, Englund A. The impact of asbestos exposure in Swedish construction workers. *Am J Ind Med* 2014;57(1):49-55.
31. Engholm G, Englund A. Asbestos hazard in the Swedish construction industry--recent trends in mesothelioma incidence. *Scand J Work Environ Health* 2005;31 Suppl 2:27-30.
32. Coggon D, Inskip H, Winter P, *et al.* Differences in occupational mortality from pleural cancer, peritoneal cancer, and asbestosis. *Occup Environ Med* 1995;52(11):775-7.
33. Frost G, Harding AH, Darnton A, *et al.* Occupational exposure to asbestos and mortality among asbestos removal workers: a Poisson regression analysis. *Br J Cancer* 2008;99(5):822-9.
34. Tomasallo CD, Christensen KY, Raymond M, *et al.* An Occupational Legacy: Malignant Mesothelioma Incidence and Mortality in Wisconsin. *J Occup Environ Med* 2018;60(12):1143-9.
35. Ringen K, Dement J, Hines S, *et al.* Mortality of older construction and craft workers employed at department of energy nuclear sites: Follow-up through 2016. *Am J Ind Med* 2019;62(9):742-54.

- 1 36. Driscoll T, Nelson DI, Steenland K, *et al.* The global burden of disease due to occupational carcinogens. *Am J Ind*  
2 *Med* 2005;48(6):419-31.
- 3 37. Jarvholm B. Carcinogens in the construction industry. *Ann N Y Acad Sci* 2006;1076:421-8.
- 4 38. Hutchings SJ, Rushton L. Occupational cancer in Britain. Industry sector results. *Br J Cancer* 2012;107 Suppl 1:S92-  
5 S103.
- 6 39. Marinaccio A, Binazzi A, Di Marzio D, *et al.* Il Registro Nazionale dei Mesoteliomi. Settimo Rapporto. Rome: INAIL,  
7 2021:1-258 (Italian).
- 8 40. Angelini A, Silvestri S. Asbestos Removal Acceleration for New Jobs and Fossil Fuel Use Reduction for Public  
9 Health and Climate Readiness: A Contribution to the Revival of the Italian Economy Post-COVID-19. *New Solut*  
10 2022;31(4):434-40.
- 11 41. Mirabelli D, Kauppinen T. Occupational exposures to carcinogens in Italy: an update of CAREX database. *Int J*  
12 *Occup Environ Health* 2005;11(1):53-63.
- 13 42. Scarselli A, Corfiati M, Di Marzio D. Occupational exposure in the removal and disposal of asbestos-containing  
14 materials in Italy. *Int Arch Occup Environ Health* 2016;89(5):857-65.
- 15 43. Lacourt A, Leveque E, Guichard E, *et al.* Dose-time-response association between occupational asbestos exposure  
16 and pleural mesothelioma. *Occup Environ Med* 2017;74(9):691-7.
- 17 44. Lacourt A, Leveque E, Goldberg M, *et al.* Dose-time response association between occupational asbestos  
18 exposure and pleural mesothelioma: authors' response. *Occup Environ Med* 2018;75(2):161-2.
- 19 45. Boffetta P, Pira E, Romano C, *et al.* Response to: 'Dose-time-response association between occupational asbestos  
20 exposure and pleural mesothelioma' by Lacourt *et al.* *Occup Environ Med* 2018;75(2):160.
- 21  
22  
23  
24  
25  
26  
27  
28  
29  
30  
31  
32  
33  
34  
35  
36  
37  
38  
39  
40  
41  
42  
43  
44  
45  
46  
47  
48  
49  
50  
51  
52  
53  
54  
55  
56  
57  
58  
59  
60

## Figure legends

**Figure 1** Diagram showing numbers of male pleural mesothelioma cases and controls across the years and their main characteristics, Italy, 2000-2018. Cases from all years and areas (analysis A1). In the primary approach subjects ever employed in non-construction blue collar occupations for >5 years were excluded; in the secondary approach all subjects (also those ever employed in non-construction blue collar occupation for >5 years) were included.

### Figure 1 footnotes

Abbreviations: CARA, Cholangiocarcinoma Aetiology: Role of Asbestos; EAGLE, Environment And Genetics in Lung cancer Etiology; MISEM, Multicentre Italian Study on the Etiology of Mesothelioma; ReNaM, Registro Nazionale Mesoteliomi

**Figure 2** Pleural mesothelioma odds ratios (OR) and 90% confidence intervals (CI) for selected occupations in men in the construction industry (ISIC-71 code 5000) in four analyses, Italy, 2000–2018. Results of the primary approach (subjects ever employed in non-construction blue collar occupations for >5 years excluded): ever employed in construction, blue collars, and three-digits ISCO-68 unit groups within minor group 95 “Bricklayers, carpenters and other construction workers”. A1: overall analysis using all Italian cases, 2000-2018; A2: analysis with cases selected from the same periods of controls; A3: analysis with cases selected from the same areas of controls; A4; analysis with cases selected from the same periods and areas of controls. In parentheses the International Standard Classification of Occupations (ISCO, 1968) codes.

**Figure 3** Pleural mesothelioma odds ratios (OR) and 90% confidence intervals (CI) for selected occupations in men in the construction industry (ISIC-71 code 5000) in four analyses, Italy, 2000–2018. Results of the primary approach (subjects ever employed in non-construction blue collar occupations for >5 years excluded): other three-digit ISCO-68 unit groups. A1: overall analysis using all Italian cases, 2000-2018; A2: analysis with cases selected from the same periods of controls; A3: analysis with cases selected from the same areas of controls; A4; analysis with cases selected from the same periods and areas of controls. In parentheses the International Standard Classification of Occupations (ISCO, 1968) codes.

| Period    | Year    | N. cases<br>Primary/<br>secondary<br>approach | Case source                                                                                                                                               | Control source                                                                                                                                                                                 |
|-----------|---------|-----------------------------------------------|-----------------------------------------------------------------------------------------------------------------------------------------------------------|------------------------------------------------------------------------------------------------------------------------------------------------------------------------------------------------|
| 2000-2018 | 2000    | 227/682                                       | <b>NATIONAL<br/>MESOTHELIOMA<br/>REGISTRY</b><br>Living in any Region<br>ReNaM questionnaire<br><b>Primary/secondary<br/>approach:<br/>N. 4797/15 592</b> |                                                                                                                                                                                                |
|           | 2001    | 207/734                                       |                                                                                                                                                           |                                                                                                                                                                                                |
|           | 2002    | 214/760                                       |                                                                                                                                                           | <b>EAGLE</b> Living in 216 municipalities in five<br>Lombardy Provinces<br>(Milan, Monza, Brescia, Pavia, Varese)<br>EAGLE questionnaire<br><b>Primary/secondary approach:<br/>N. 778/1617</b> |
|           | 2003    | 238/758                                       |                                                                                                                                                           |                                                                                                                                                                                                |
|           | 2004    | 246/768                                       |                                                                                                                                                           |                                                                                                                                                                                                |
|           | 2005    | 259/861                                       |                                                                                                                                                           |                                                                                                                                                                                                |
|           | 2006    | 242/782                                       |                                                                                                                                                           |                                                                                                                                                                                                |
|           | 2007    | 248/882                                       |                                                                                                                                                           |                                                                                                                                                                                                |
|           | 2008    | 240/857                                       |                                                                                                                                                           |                                                                                                                                                                                                |
|           | 2009    | 285/901                                       |                                                                                                                                                           |                                                                                                                                                                                                |
|           | 2010    | 271/851                                       |                                                                                                                                                           |                                                                                                                                                                                                |
|           | 2011    | 254/886                                       |                                                                                                                                                           |                                                                                                                                                                                                |
|           | 2012    | 288/886                                       |                                                                                                                                                           | <b>MISEM</b> Living in five Regions (Apulia,<br>Lombardy, Piedmont,<br>Tuscany, Veneto)<br>ReNaM questionnaire<br><b>Primary/secondary approach: N. 250/490</b>                                |
|           | 2013    | 304/979                                       |                                                                                                                                                           |                                                                                                                                                                                                |
|           | 2014    | 289/928                                       |                                                                                                                                                           | <b>CARA</b> Living in one Region<br>(Emilia-Romagna)<br>ReNaM questionnaire<br><b>Primary/secondary approach:<br/>N. 57/103</b>                                                                |
|           | 2015    | 283/921                                       |                                                                                                                                                           |                                                                                                                                                                                                |
| 2016      | 294/910 |                                               |                                                                                                                                                           |                                                                                                                                                                                                |
| 2017      | 287/841 |                                               |                                                                                                                                                           |                                                                                                                                                                                                |
| 2018      | 121/405 |                                               |                                                                                                                                                           |                                                                                                                                                                                                |

1

210x297mm (200 x 200 DPI)



1  
2  
3  
4  
5  
6  
7  
8  
9  
10  
11  
12  
13  
14  
15  
16  
17  
18  
19  
20  
21  
22  
23  
24  
25  
26  
27  
28  
29  
30  
31  
32  
33  
34  
35  
36  
37  
38  
39  
40  
41  
42  
43  
44  
45  
46  
47  
48  
49  
50  
51  
52  
53  
54  
55  
56  
57  
58  
59  
60

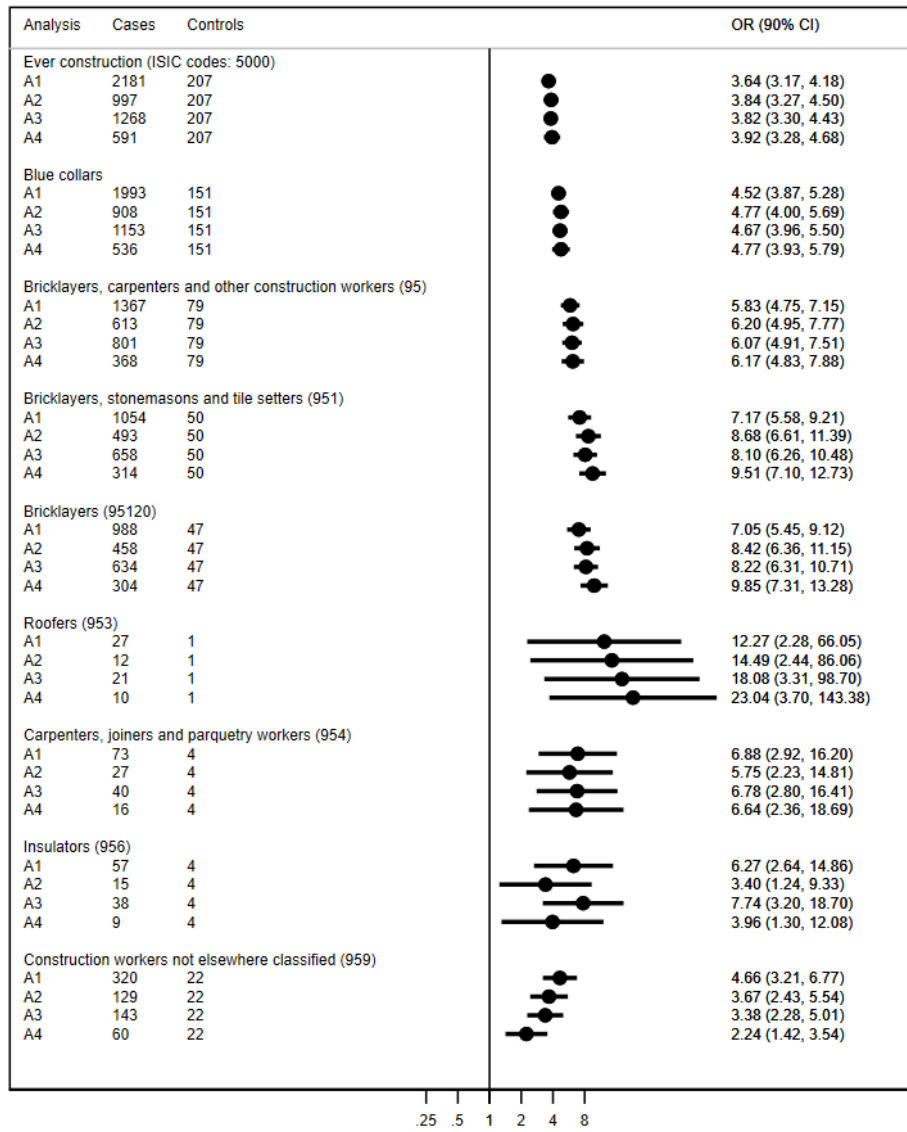

272x329mm (72 x 72 DPI)

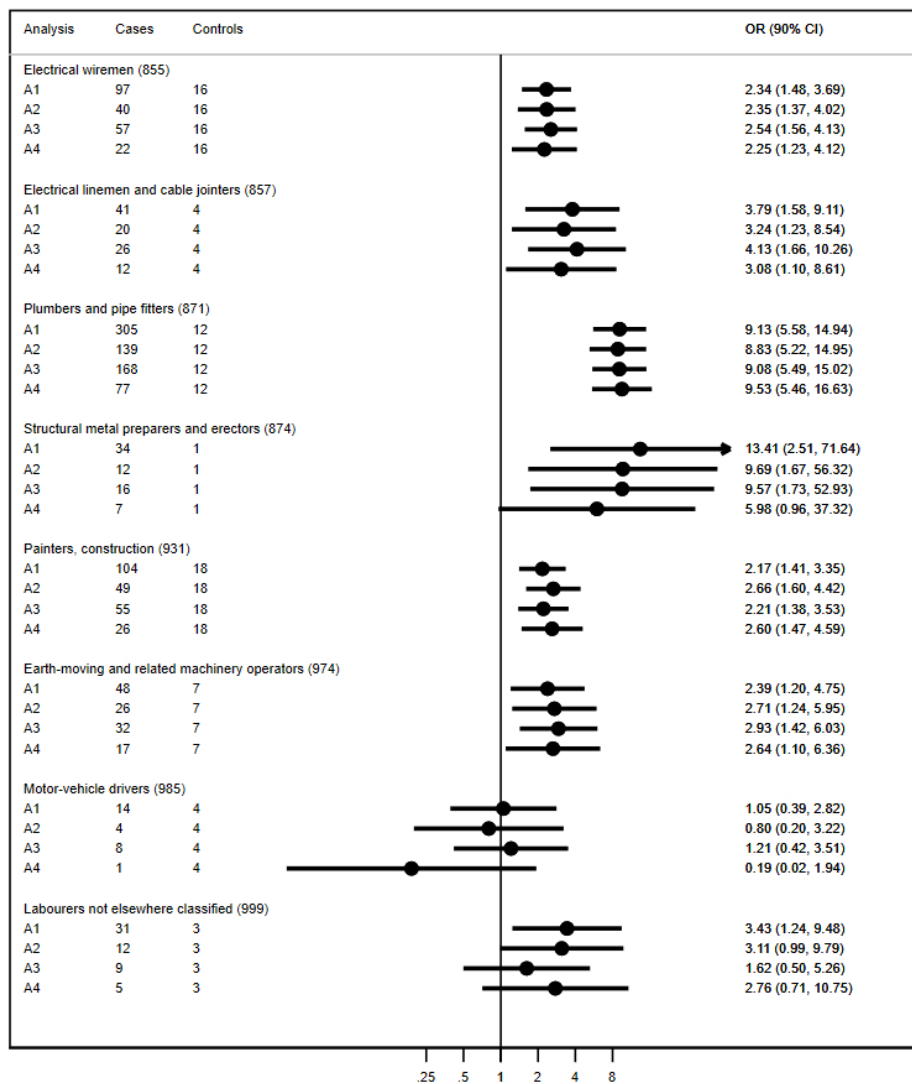

285x329mm (72 x 72 DPI)

**Supplementary Figure 1** Diagram showing numbers of male pleural mesothelioma cases and controls across the years and their main characteristics, Italy, 2002-2004 and 2012-2016. Cases selected from the **same periods** of controls (**analysis A2**). In the primary approach subjects ever employed in non-construction blue collar occupations for >5 years were excluded; in the secondary approach all subjects (also those ever employed in non-construction blue collar occupations for >5 years) were included.

| Period                        | Year | N. cases<br>Primary/<br>secondary<br>approach | Case source                                                                                                                                             | Control source                                                                                                                                                                           |
|-------------------------------|------|-----------------------------------------------|---------------------------------------------------------------------------------------------------------------------------------------------------------|------------------------------------------------------------------------------------------------------------------------------------------------------------------------------------------|
| 2002-2004<br>and<br>2012-2016 | 2002 | 214/760                                       | <b>NATIONAL<br/>MESOTHELIOMA<br/>REGISTRY</b><br>Living in any Region<br>ReNaM questionnaire<br><b>Primary/secondary<br/>approach:<br/>N. 2156/6910</b> | <b>EAGLE</b> Living in 216 municipalities in five Lombardy Provinces (Milan, Monza, Brescia, Pavia, Varese)<br>EAGLE questionnaire<br><b>Primary/secondary approach:<br/>N. 778/1617</b> |
|                               | 2003 | 238/758                                       |                                                                                                                                                         |                                                                                                                                                                                          |
|                               | 2004 | 246/768                                       |                                                                                                                                                         |                                                                                                                                                                                          |
|                               | 2012 | 288/886                                       |                                                                                                                                                         | <b>MISEM</b> Living in five Regions (Apulia, Lombardy, Piedmont, Tuscany, Veneto)<br>ReNaM questionnaire<br><b>Primary/secondary approach: N. 250/490</b>                                |
|                               | 2013 | 304/979                                       |                                                                                                                                                         |                                                                                                                                                                                          |
|                               | 2014 | 289/928                                       |                                                                                                                                                         |                                                                                                                                                                                          |
|                               | 2015 | 283/921                                       |                                                                                                                                                         |                                                                                                                                                                                          |
|                               | 2016 | 294/910                                       |                                                                                                                                                         |                                                                                                                                                                                          |

CARA, Cholangiocarcinoma Aetiology: Role of Asbestos; EAGLE, Environment And Genetics in Lung cancer Etiology; MISEM, Multicentre Italian Study on the Etiology of Mesothelioma; ReNaM, Registro Nazionale Mesoteliomi

**Supplementary Figure 2** Diagram showing numbers of male pleural mesothelioma cases and controls across the years and their main characteristics, Italy, 2000–2018. Cases selected from the **same areas** of controls (**analysis A3**). In the primary approach subjects ever employed in non-construction blue collar occupations for >5 years were excluded; in the secondary approach all subjects (also those ever employed in non-construction blue collar occupations for >5 years) were included.

| Period    | Year    | N. cases<br>Primary/<br>secondary<br>approach | Case source                                                                                                                                                                                                                                           | Control source |
|-----------|---------|-----------------------------------------------|-------------------------------------------------------------------------------------------------------------------------------------------------------------------------------------------------------------------------------------------------------|----------------|
| 2000-2018 | 2000    | 134/389                                       | <b>LOMBARDY<br/>MESOTHELIOMA<br/>REGISTRY</b><br>Living in six Regions<br>(Lombardy, Piedmont,<br>Veneto, Tuscany, Apulia,<br>Emilia-Romagna)<br>ReNaM questionnaire<br><b>Primary/secondary<br/>           approach:<br/>           N. 2690/8933</b> |                |
|           | 2001    | 117/399                                       |                                                                                                                                                                                                                                                       |                |
|           | 2002    | 114/405                                       |                                                                                                                                                                                                                                                       |                |
|           | 2003    | 142/444                                       |                                                                                                                                                                                                                                                       |                |
|           | 2004    | 134/443                                       |                                                                                                                                                                                                                                                       |                |
|           | 2005    | 135/481                                       |                                                                                                                                                                                                                                                       |                |
|           | 2006    | 125/419                                       |                                                                                                                                                                                                                                                       |                |
|           | 2007    | 121/471                                       |                                                                                                                                                                                                                                                       |                |
|           | 2008    | 129/469                                       |                                                                                                                                                                                                                                                       |                |
|           | 2009    | 156/507                                       |                                                                                                                                                                                                                                                       |                |
|           | 2010    | 142/482                                       |                                                                                                                                                                                                                                                       |                |
|           | 2011    | 156/540                                       |                                                                                                                                                                                                                                                       |                |
|           | 2012    | 176/532                                       |                                                                                                                                                                                                                                                       |                |
|           | 2013    | 176/604                                       |                                                                                                                                                                                                                                                       |                |
|           | 2014    | 146/505                                       |                                                                                                                                                                                                                                                       |                |
|           | 2015    | 161/526                                       |                                                                                                                                                                                                                                                       |                |
|           | 2016    | 188/592                                       |                                                                                                                                                                                                                                                       |                |
| 2017      | 179/536 |                                               |                                                                                                                                                                                                                                                       |                |
| 2018      | 59/189  |                                               |                                                                                                                                                                                                                                                       |                |

CARA, Cholangiocarcinoma Aetiology: Role of Asbestos; EAGLE, Environment And Genetics in Lung cancer Etiology; MISEM, Multicentre Italian Study on the Etiology of Mesothelioma; ReNaM, Registro Nazionale Mesoteliomi

**Supplementary Figure 3** Diagram showing numbers of male pleural mesothelioma cases and controls across the years and their main characteristics, Italy, 2002-2004 and 2012-2016. Cases selected from the **same periods and areas** of controls (**analysis A4**). In the primary approach subjects ever employed in non-construction blue collar occupations for >5 years were excluded; in the secondary approach all subjects (also those ever employed in non-construction blue collar occupations for >5 years) were included.

| Period                        | Year | N. cases<br>Primary/<br>secondary<br>approach | Case source                                                                                                                                                                                                                     | Control source                                                                                                                                                                                                                                                                                     |
|-------------------------------|------|-----------------------------------------------|---------------------------------------------------------------------------------------------------------------------------------------------------------------------------------------------------------------------------------|----------------------------------------------------------------------------------------------------------------------------------------------------------------------------------------------------------------------------------------------------------------------------------------------------|
| 2002-2004<br>and<br>2012-2016 | 2002 | 114/405                                       | <b>NATIONAL<br/>MESOTHELIOMA<br/>REGISTRY</b><br>Living in six Regions<br>(Lombardy, Piedmont,<br>Veneto, Tuscany, Apulia,<br>Emilia-Romagna)<br>ReNaM questionnaire<br><b>Primary/secondary<br/>approach:<br/>N. 1237/4051</b> | <b>EAGLE</b> Living in 216 municipalities in five<br>Lombardy Provinces<br>(Milan, Monza, Brescia, Pavia, Varese)<br>EAGLE questionnaire<br><b>Primary/secondary approach:<br/>N. 778/1617</b>                                                                                                     |
|                               | 2003 | 142/444                                       |                                                                                                                                                                                                                                 |                                                                                                                                                                                                                                                                                                    |
|                               | 2004 | 134/443                                       |                                                                                                                                                                                                                                 |                                                                                                                                                                                                                                                                                                    |
|                               | 2012 | 176/532                                       |                                                                                                                                                                                                                                 |                                                                                                                                                                                                                                                                                                    |
|                               | 2013 | 176/605                                       |                                                                                                                                                                                                                                 | <b>MISEM</b> Living in five Regions<br>(Apulia, Lombardy, Piedmont,<br>Tuscany, Veneto)<br>ReNaM questionnaire<br><b>Primary/secondary approach: N. 250/490</b><br><br><b>CARA</b> Living in one Region<br>(Emilia-Romagna)<br>ReNaM questionnaire<br><b>Primary/secondary approach: N. 57/103</b> |
|                               | 2014 | 146/504                                       |                                                                                                                                                                                                                                 |                                                                                                                                                                                                                                                                                                    |
|                               | 2015 | 161/526                                       |                                                                                                                                                                                                                                 |                                                                                                                                                                                                                                                                                                    |
|                               | 2016 | 188/592                                       |                                                                                                                                                                                                                                 |                                                                                                                                                                                                                                                                                                    |

CARA, Cholangiocarcinoma Aetiology: Role of Asbestos; EAGLE, Environment And Genetics in Lung cancer Etiology; MISEM, Multicentre Italian Study on the Etiology of Mesothelioma; ReNaM, Registro Nazionale Mesoteliomi

**Supplementary Table 1** Pleural mesothelioma odds ratios (OR) and 90% confidence intervals (CI) by **length of employment** for selected occupations in men in the construction industry (ISIC-71 code 5000), Italy, 2000–2018. Results of the **primary approach** (subjects ever employed in non-construction blue collar occupations for >5 years excluded), **analysis A1**

| <b>Occupation (ISCO-68 code)</b>                             | <b>Cases</b> | <b>Controls</b> | <b>OR<sup>a</sup></b> | <b>90% CI</b> |
|--------------------------------------------------------------|--------------|-----------------|-----------------------|---------------|
| Never employed in construction                               | 2616         | 878             | 1.00                  | Reference     |
| Length of employment (years)                                 |              |                 |                       |               |
| Bricklayers, stonemasons and other construction workers (95) |              |                 |                       |               |
| 0.5-19                                                       | 370          | 33              | 3.98                  | 2.92-5.43     |
| 20+                                                          | 971          | 45              | 7.11                  | 5.47-9.24     |
| <i>P</i> -value for trend                                    |              |                 | <0.001                |               |
| <i>P</i> -value for trend, reference category excluded       |              |                 | 0.02                  |               |
| Bricklayers, stonemasons and tile setters (951)              |              |                 |                       |               |
| 0.5-19                                                       | 246          | 14              | 6.72                  | 4.24-10.7     |
| 20+                                                          | 788          | 34              | 7.61                  | 5.64-10.3     |
| <i>P</i> -value for trend                                    |              |                 | <0.001                |               |
| <i>P</i> -value for trend, reference category excluded       |              |                 | 0.79                  |               |
| Bricklayers (95120)                                          |              |                 |                       |               |
| 0.5-19                                                       | 233          | 14              | 6.27                  | 3.95-9.96     |
| 20+                                                          | 735          | 29              | 8.25                  | 5.98-11.4     |
| <i>P</i> -value for trend                                    |              |                 | <0.001                |               |
| <i>P</i> -value for trend, reference category excluded       |              |                 | 0.44                  |               |
| Construction workers not elsewhere classified (959)          |              |                 |                       |               |
| 0.5-19                                                       | 224          | 16              | 4.48                  | 2.90-6.93     |
| 20+                                                          | 90           | 6               | 4.78                  | 2.36-9.68     |
| <i>P</i> -value for trend                                    |              |                 | <0.001                |               |
| <i>P</i> -value for trend, reference category excluded       |              |                 | 0.59                  |               |
| Electrical wiremen (855)                                     |              |                 |                       |               |
| 0.5-19                                                       | 42           | 7               | 2.39                  | 1.20-4.75     |
| 20+                                                          | 55           | 9               | 2.30                  | 1.25-4.21     |
| <i>P</i> -value for trend                                    |              |                 | 0.004                 |               |
| <i>P</i> -value for trend, reference category excluded       |              |                 | 0.61                  |               |
| Plumbers and pipe fitters (871)                              |              |                 |                       |               |
| 0.5-19                                                       | 90           | 6               | 5.48                  | 2.71-11.1     |
| 20+                                                          | 213          | 6               | 12.56                 | 6.31-25.0     |
| <i>P</i> -value for trend                                    |              |                 | <0.001                |               |
| <i>P</i> -value for trend, reference category excluded       |              |                 | 0.20                  |               |
| Painters (931)                                               |              |                 |                       |               |
| 0.5-19                                                       | 37           | 7               | 2.33                  | 1.16-4.67     |
| 20+                                                          | 64           | 10              | 2.11                  | 1.18-3.76     |
| <i>P</i> -value for trend                                    |              |                 | 0.007                 |               |
| <i>P</i> -value for trend, reference category excluded       |              |                 | 0.65                  |               |

ISCO, International Standard Classification of Occupations (1968); ISIC, International Standard Industry Classification (1971)

<sup>a</sup>OR calculated with unconditional logistic regression models adjusted for age (categorical) and period

**Supplementary Table 2** Pleural mesothelioma odds ratios (OR) and 90% confidence intervals (CI) for selected occupations in men in the construction industry (ISIC-71 code 5000), Italy, 2000–2018. Results of the **secondary approach** (all subjects included, also those ever employed in non-construction blue collar occupations for >5 years), **analysis A1**

| Occupation (ISCO-68 code)                                          | Cases  | Controls | OR*  | 90% CI    |
|--------------------------------------------------------------------|--------|----------|------|-----------|
| Total                                                              | 15 592 | 2210     |      |           |
| Never employed in construction                                     | 10 863 | 1808     | 1.00 | Reference |
| Ever employed in construction                                      | 4729   | 402      | 2.00 | 1.82-2.21 |
| Blue collars (55, 56, 581, 628, 631, 7-9)                          | 4506   | 342      | 2.24 | 2.02-2.48 |
| Bricklayers, carpenters, and other construction workers (95)       | 2877   | 183      | 2.60 | 2.28-2.98 |
| Bricklayers, stonemasons and tile setters (951)                    | 1921   | 127      | 2.48 | 2.12-2.91 |
| Bricklayers (95120)                                                | 1778   | 118      | 2.44 | 2.07-2.87 |
| Reinforced concreters, cement finishers and terrazzo workers (952) | 35     | 0        | NC   |           |
| Roofers (953)                                                      | 66     | 3        | 4.55 | 1.71-12.1 |
| Carpenters, joiners and parquetry workers (954)                    | 161    | 9        | 3.19 | 1.80-5.65 |
| Plasterers (955)                                                   | 20     | 2        | 1.66 | 0.48-5.81 |
| Insulators (956)                                                   | 122    | 4        | 6.16 | 2.66-14.3 |
| Glaziers (957)                                                     | 1      | 12       | NC   |           |
| Construction workers NEC (959)                                     | 873    | 39       | 3.49 | 2.65-4.60 |
| Other blue collar occupations                                      |        |          |      |           |
| Electrical wiremen (855)                                           | 298    | 40       | 1.38 | 1.03-1.83 |
| Electrical linemen and cable jointers (857)                        | 119    | 8        | 2.64 | 1.44-4.85 |
| Plumbers and pipe fitters (871)                                    | 608    | 31       | 3.54 | 2.60-4.82 |
| Welders and flame-cutters (872)                                    | 18     | 0        | NC   |           |
| Sheet-metal workers (873)                                          | 33     | 1        | 7.06 | 1.32-37.8 |
| Structural metal preparers and erectors (874)                      | 121    | 3        | 7.37 | 2.81-19.4 |
| Painters, construction (931)                                       | 241    | 33       | 1.25 | 0.91-1.71 |
| Crane and hoist operators (973)                                    | 49     | 4        | 2.39 | 1.01-5.67 |
| Earth-moving and related machinery operators (974)                 | 100    | 23       | 0.69 | 0.47-1.03 |
| Motor-vehicle drivers (985)                                        | 70     | 11       | 1.08 | 0.63-1.88 |
| Labourers NEC (999)                                                | 101    | 5        | 3.21 | 1.50-6.88 |

ISCO, International Standard Classification of Occupations (1968); ISIC, International Standard Industry Classification (1971); NC, not calculable; NEC, not elsewhere classified.

\*OR calculated with unconditional logistic regression models adjusted for age (categorical) and period.

**Supplementary Figure 4** Pleural mesothelioma odds ratios (OR) and 90% confidence intervals (CI) for selected occupations in men in the construction industry (ISIC-71 code 5000) in four analyses, Italy, 2000–2018. Results of the **secondary approach** (all subjects included, also those ever employed in non-construction blue collar occupations for >5 years): ever employed in construction, blue collars, and three-digits ISCO-68 unit groups within minor group 95 “Bricklayers, carpenters and other construction workers”. A1: overall analysis using all Italian cases, 2000-2018; A2: analysis with cases selected from the same periods of controls; A3: analysis with cases selected from the same areas of controls; A4: analysis with cases selected from the same periods and areas of controls. In parentheses the International Standard Classification of Occupations (ISCO, 1968) codes.





**Supplementary Figure 5** Pleural mesothelioma odds ratios (OR) and 90% confidence intervals (CI) for selected occupations in men in the construction industry (ISIC-71 code 5000) in four analyses, Italy, 2000–2018. Results of the **secondary approach** (all subjects included, also those ever employed in non-construction blue collar occupations for >5 years): other three-digit ISCO-68 unit groups. A1: overall analysis using all Italian cases, 2000-2018; A2: analysis with cases selected from the same periods of controls; A3: analysis with cases selected from the same areas of controls; A4: analysis with cases selected from the same periods and areas of controls. In parentheses the International Standard Classification of Occupations (ISCO, 1968) codes.



STROBE Statement—Checklist of items that should be included in reports of *case-control studies*

|                              | Item No | Recommendation                                                                                                                                                                                    | Comment                                                      |
|------------------------------|---------|---------------------------------------------------------------------------------------------------------------------------------------------------------------------------------------------------|--------------------------------------------------------------|
| <b>Title and abstract</b>    | 1       | (a) Indicate the study's design with a commonly used term in the title or the abstract                                                                                                            | Pag.1                                                        |
|                              |         | (b) Provide in the abstract an informative and balanced summary of what was done and what was found                                                                                               | Pag.3                                                        |
| <b>Introduction</b>          |         |                                                                                                                                                                                                   |                                                              |
| Background/rationale         | 2       | Explain the scientific background and rationale for the investigation being reported                                                                                                              | Pag.5-6                                                      |
| Objectives                   | 3       | State specific objectives, including any prespecified hypotheses                                                                                                                                  | Pag.6                                                        |
| <b>Methods</b>               |         |                                                                                                                                                                                                   |                                                              |
| Study design                 | 4       | Present key elements of study design early in the paper                                                                                                                                           | Pag.6-8                                                      |
| Setting                      | 5       | Describe the setting, locations, and relevant dates, including periods of recruitment, exposure, follow-up, and data collection                                                                   | Pag.6-8                                                      |
| Participants                 | 6       | (a) Give the eligibility criteria, and the sources and methods of case ascertainment and control selection. Give the rationale for the choice of cases and controls                               | Pag.6-8                                                      |
|                              |         | (b) For matched studies, give matching criteria and the number of controls per case                                                                                                               | Not applicable                                               |
| Variables                    | 7       | Clearly define all outcomes, exposures, predictors, potential confounders, and effect modifiers. Give diagnostic criteria, if applicable                                                          | Pag.6-9                                                      |
| Data sources/<br>measurement | 8*      | For each variable of interest, give sources of data and details of methods of assessment (measurement). Describe comparability of assessment methods if there is more than one group              | Pag.6-9                                                      |
| Bias                         | 9       | Describe any efforts to address potential sources of bias                                                                                                                                         | Pag.8-9                                                      |
| Study size                   | 10      | Explain how the study size was arrived at                                                                                                                                                         | Pag.6-7                                                      |
| Quantitative variables       | 11      | Explain how quantitative variables were handled in the analyses. If applicable, describe which groupings were chosen and why                                                                      | Pag.8                                                        |
| Statistical methods          | 12      | (a) Describe all statistical methods, including those used to control for confounding                                                                                                             | Pag.8-9                                                      |
|                              |         | (b) Describe any methods used to examine subgroups and interactions                                                                                                                               | Pag.8-9                                                      |
|                              |         | (c) Explain how missing data were addressed                                                                                                                                                       | Pag.11                                                       |
|                              |         | (d) If applicable, explain how matching of cases and controls was addressed                                                                                                                       | Not applicable.                                              |
|                              |         | (e) Describe any sensitivity analyses                                                                                                                                                             | Pag.8-9                                                      |
| <b>Results</b>               |         |                                                                                                                                                                                                   |                                                              |
| Participants                 | 13*     | (a) Report numbers of individuals at each stage of study—eg numbers potentially eligible, examined for eligibility, confirmed eligible, included in the study, completing follow-up, and analysed | Pag.8-9,<br>Figure 1,<br>Suppl. Figures<br>1-3               |
|                              |         | (b) Give reasons for non-participation at each stage                                                                                                                                              | Participation<br>been reported<br>in the original<br>studies |

|                          |     |                                                                                                                                                                                                              |                                                                                       |
|--------------------------|-----|--------------------------------------------------------------------------------------------------------------------------------------------------------------------------------------------------------------|---------------------------------------------------------------------------------------|
|                          |     | (c) Consider use of a flow diagram                                                                                                                                                                           | Figure 1,<br>Suppl. Figures<br>1-3                                                    |
| Descriptive data         | 14* | (a) Give characteristics of study participants (eg demographic, clinical, social) and information on exposures and potential confounders                                                                     | Pag.9-10,<br>Table 1                                                                  |
|                          |     | (b) Indicate number of participants with missing data for each variable of interest                                                                                                                          | Pag.10 (Table<br>1)                                                                   |
| Outcome data             | 15* | Report numbers in each exposure category, or summary measures of exposure                                                                                                                                    | Pag.2 (Table<br>2) and Suppl.<br>Table 2                                              |
| Main results             | 16  | (a) Give unadjusted estimates and, if applicable, confounder-adjusted estimates and their precision (eg, 95% confidence interval). Make clear which confounders were adjusted for and why they were included | Since previous<br>studies were<br>matched,<br>crude analysis<br>is not<br>appropriate |
|                          |     | (b) Report category boundaries when continuous variables were categorized                                                                                                                                    | Pag.10 (Table<br>1), and Suppl.<br>Table 1                                            |
|                          |     | (c) If relevant, consider translating estimates of relative risk into absolute risk for a meaningful time period                                                                                             | Not applicable                                                                        |
| Other analyses           | 17  | Report other analyses done—eg analyses of subgroups and interactions, and sensitivity analyses                                                                                                               | Pag.10-11                                                                             |
| <b>Discussion</b>        |     |                                                                                                                                                                                                              |                                                                                       |
| Key results              | 18  | Summarise key results with reference to study objectives                                                                                                                                                     | Pag.12                                                                                |
| Limitations              | 19  | Discuss limitations of the study, taking into account sources of potential bias or imprecision. Discuss both direction and magnitude of any potential bias                                                   | Pag.13-14                                                                             |
| Interpretation           | 20  | Give a cautious overall interpretation of results considering objectives, limitations, multiplicity of analyses, results from similar studies, and other relevant evidence                                   | Pag.12-14                                                                             |
| Generalisability         | 21  | Discuss the generalisability (external validity) of the study results                                                                                                                                        | Pag.12                                                                                |
| <b>Other information</b> |     |                                                                                                                                                                                                              |                                                                                       |
| Funding                  | 22  | Give the source of funding and the role of the funders for the present study and, if applicable, for the original study on which the present article is based                                                | Pag.15                                                                                |

\*Give information separately for cases and controls.

**Note:** An Explanation and Elaboration article discusses each checklist item and gives methodological background and published examples of transparent reporting. The STROBE checklist is best used in conjunction with this article (freely available on the Web sites of PLoS Medicine at <http://www.plosmedicine.org/>, Annals of Internal Medicine at <http://www.annals.org/>, and Epidemiology at <http://www.epidem.com/>). Information on the STROBE Initiative is available at <http://www.strobe-statement.org>.
